# Supplementary material for: Immune cell infiltration characteristics and related core genes in lupus nephritis: results from bioinformatic analysis
Source: BMC Immunol. 2019 Oct 21;20:37. doi: 10.1186/s12865-019-0316-x (PMC6805654; doi:10.1186/s12865-019-0316-x)
Supplement: Supplementary file 1 — Additional file 1. The details of GO analysis. [file 12865_2019_316_MOESM1_ESM.csv]

	ID	Description	setSize	enrichmentScore	NES	pvalue	p.adjust	qvalues	rank	leading_edge	core_enrichment
GO:0002253	GO:0002253	activation of immune response	478	0.614573208	2.428009644	0.001239157	0.030113569	0.025636496	1070	tags=29%, list=10%, signal=28%	C1QA/RSAD2/C1QB/ITGB2/HCK/C3AR1/FCER1G/FCN1/CD36/CD14/PTPRC/LYN/IFIH1/LY96/PYCARD/VSIG4/CTSS/HLA-DQB1/TLR2/IRF7/CD300A/IGHM/GBP1/DDX58/IFI16/TLR1/PLSCR1/CFD/FPR3/BTN3A3/HLA-DPA1/HLA-DQA1/PSMB9/LCP2/CLEC7A/BTN3A2/HLA-DPB1/ARPC1B/ITGAM/MNDA/A2M/GATA3/ICAM2/FGR/ADA/MICB/LTF/DDX60/LAT2/NCKAP1L/IGHA1/MYD88/PTPN6/LPXN/HLA-DRA/CD3D/PSME2/C5AR1/HLA-DRB1/KRAS/CFP/SYK/PRKCB/CFH/DHX58/PRKCH/IGKV3-20/IGLV2-1…
GO:0006935	GO:0006935	chemotaxis	475	0.384158357	1.517355435	0.001239157	0.030113569	0.025636496	1140	tags=19%, list=10%, signal=17%	ITGB2/C3AR1/CX3CR1/FCER1G/LYN/DOCK2/CCR1/CCL4/CSF1R/CORO1A/PLA2G7/FPR3/CXCR4/PDGFD/CCRL2/RAC2/AGTR1/TYMP/CCL5/GATA3/NCKAP1L/DOK2/PDGFRA/C5AR1/KRAS/SYK/CKLF/CCL8/NRP1/NRAS/S1PR1/CMTM6/CCR5/S100A8/VAV1/FPR1/CXCL12/KDR/CXCL10/CCL19/RHOG/GPR18/RALA/ANGPT1/CDH13/LGALS9/EDNRB/PRKD2/PLAUR/RNASE2/SPON2/RPS19/VEGFC/MATN2/SEMA4C/CCR2/DOK5/LAMA2/ENAH/GRB2/CCL2/CD74/MAP2K1/DOCK4/SWAP70/PF4/ADAM10/VCAM1/PLXNA…
GO:0042330	GO:0042330	taxis	476	0.383531935	1.514598449	0.001239157	0.030113569	0.025636496	1140	tags=18%, list=10%, signal=17%	ITGB2/C3AR1/CX3CR1/FCER1G/LYN/DOCK2/CCR1/CCL4/CSF1R/CORO1A/PLA2G7/FPR3/CXCR4/PDGFD/CCRL2/RAC2/AGTR1/TYMP/CCL5/GATA3/NCKAP1L/DOK2/PDGFRA/C5AR1/KRAS/SYK/CKLF/CCL8/NRP1/NRAS/S1PR1/CMTM6/CCR5/S100A8/VAV1/FPR1/CXCL12/KDR/CXCL10/CCL19/RHOG/GPR18/RALA/ANGPT1/CDH13/LGALS9/EDNRB/PRKD2/PLAUR/RNASE2/SPON2/RPS19/VEGFC/MATN2/SEMA4C/CCR2/DOK5/LAMA2/ENAH/GRB2/CCL2/CD74/MAP2K1/DOCK4/SWAP70/PF4/ADAM10/VCAM1/PLXNA…
GO:0048514	GO:0048514	blood vessel morphogenesis	472	0.374397297	1.478402483	0.001239157	0.030113569	0.025636496	1565	tags=23%, list=14%, signal=21%	ITGB2/C3AR1/CX3CR1/TGFBI/CYBB/MMRN2/TIE1/FN1/APLNR/COL3A1/PPARG/AGTR1/COL4A1/COL4A2/TYMP/COL15A1/HPSE/HMOX1/STAT1/MCAM/PDGFRA/C5AR1/SYK/PRKCB/CDH5/PLK2/VASH1/NRP1/S1PR1/NOTCH4/CD34/PRCP/RAP1A/TWIST1/KDR/CXCL10/HEG1/HDAC9/FAP/SP100/C3/ANGPT1/CALCRL/RASIP1/CDH13/WARS/SOX18/CLIC4/MFGE8/PTN/SOX4/SERPINF1/SPHK1/SOX17/PRKD2/PTEN/STAB1/BTG1/VEGFC/PRKX/CCR2/CCL2/ACVRL1/BAK1/SFRP1/CD40/HEY1/PF4/SAT1/PDCD1…
GO:0030003	GO:0030003	cellular cation homeostasis	480	0.358595913	1.416018322	0.001240695	0.030113569	0.025636496	1178	tags=14%, list=11%, signal=13%	C3AR1/CD36/PTPRC/LYN/CD52/CCR1/PTGER2/CORO1A/FPR3/LPAR6/APLNR/CXCR4/HTR2B/GPR65/AGTR1/CCL5/HEPH/LTF/CLIC2/HMOX1/PTPN6/PDGFRA/C5AR1/PRKCB/ANXA6/CCL8/S1PR1/CCR5/S100A8/CD38/FPR1/CXCL12/CXCL10/CCL19/SLC31A1/GPR18/KCNJ2/GNA15/CLIC4/SLC26A2/ATP6V0A2/SLC39A8/EDNRB/LCK/CCR2/ATP6V1B2/BAK1/CD40/TCIRG1/SWAP70/CCL21/MAFG/CAV1/TMEM165/THY1/APP/NUBP1/FTH1/ATP6V0E1/GPR4/BAX/NMU/CALM3/ATP1B3/MYO5A/ITPR3
GO:0002757	GO:0002757	immune response-activating signal transduction	418	0.613383322	2.406509616	0.001246883	0.030113569	0.025636496	1271	tags=32%, list=12%, signal=30%	RSAD2/ITGB2/HCK/C3AR1/FCER1G/FCN1/CD36/CD14/PTPRC/LYN/IFIH1/LY96/CTSS/HLA-DQB1/TLR2/IRF7/CD300A/IGHM/GBP1/DDX58/TLR1/PLSCR1/FPR3/BTN3A3/HLA-DPA1/HLA-DQA1/PSMB9/LCP2/CLEC7A/BTN3A2/HLA-DPB1/ARPC1B/ITGAM/MNDA/GATA3/ICAM2/FGR/ADA/MICB/LTF/DDX60/LAT2/NCKAP1L/IGHA1/MYD88/PTPN6/LPXN/HLA-DRA/CD3D/PSME2/C5AR1/HLA-DRB1/KRAS/SYK/PRKCB/DHX58/PRKCH/IGKV3-20/IGLV2-14/NRAS/TRIM5/ARPC2/S100A8/CD38/MARCO/VAV1/PEL…
GO:0002444	GO:0002444	myeloid leukocyte mediated immunity	449	0.499511235	1.967370751	0.001251564	0.030113569	0.025636496	1223	tags=25%, list=11%, signal=23%	TYROBP/CD53/ITGB2/C3AR1/FCER1G/FCN1/LYZ/CD36/CD14/PTPRC/LYN/PYCARD/GLIPR1/CTSS/DOCK2/TLR2/PLAC8/CD300A/CYBB/FGL2/PTX3/CFD/HBB/TNFRSF1B/FCGR3B/RAC2/GMFG/CD44/ITGAM/MNDA/HPSE/FGR/PECAM1/LTF/LAT2/NCKAP1L/HMOX1/PTPN6/CD93/MAN2B1/LILRB2/STK10/LAIR1/C5AR1/IL13RA2/CFP/SYK/CD68/RNASET2/ALOX5/NRAS/HK3/CMTM6/S100A8/GCA/PLEKHO2/SELL/PRCP/PYGL/RAP1A/FPR1/QPCT/S100A11/RHOG/BTK/DSP/CTSZ/CD58/C3/RAP2C/PSMC2/LGA…
GO:0002764	GO:0002764	immune response-regulating signaling pathway	447	0.592753815	2.333064169	0.001251564	0.030113569	0.025636496	1271	tags=31%, list=12%, signal=29%	RSAD2/ITGB2/HCK/C3AR1/FCER1G/FCN1/CD36/CD14/PTPRC/LYN/IFIH1/LY96/CTSS/HLA-DQB1/TLR2/IRF7/CD300A/IGHM/GBP1/DDX58/TLR1/PLSCR1/FPR3/BTN3A3/HLA-DPA1/HLA-DQA1/PSMB9/LCP2/CLEC7A/BTN3A2/HLA-DPB1/ARPC1B/ITGAM/MNDA/GATA3/ICAM2/FGR/ADA/MICB/LTF/DDX60/LAT2/NCKAP1L/IGHA1/MYD88/PTPN6/LPXN/LILRB2/HLA-DRA/CD3D/PSME2/C5AR1/HLA-DRB1/KRAS/SYK/PRKCB/DHX58/PRKCH/IGKV3-20/IGLV2-14/NRAS/TRIM5/ARPC2/S100A8/CD38/MARCO/V…
GO:0002275	GO:0002275	myeloid cell activation involved in immune response	445	0.506226388	1.992998355	0.001253133	0.030113569	0.025636496	1223	tags=26%, list=11%, signal=24%	TYROBP/CD53/ITGB2/C3AR1/CX3CR1/FCER1G/FCN1/LYZ/CD36/CD14/PTPRC/LYN/PYCARD/GLIPR1/CTSS/DOCK2/TLR2/PLAC8/CD300A/CYBB/FGL2/PTX3/CFD/HBB/TNFRSF1B/FCGR3B/RAC2/GMFG/CD44/ITGAM/MNDA/HPSE/FGR/PECAM1/LTF/LAT2/NCKAP1L/HMOX1/PTPN6/CD93/MAN2B1/LILRB2/STK10/LAIR1/C5AR1/IL13RA2/CFP/SYK/CD68/RNASET2/ALOX5/NRAS/HK3/CMTM6/S100A8/GCA/PLEKHO2/SELL/PRCP/PYGL/RAP1A/FPR1/QPCT/S100A11/RHOG/BTK/DSP/CTSZ/CD58/C3/RAP2C/PS…
GO:0002790	GO:0002790	peptide secretion	441	0.414617669	1.631017837	0.001253133	0.030113569	0.025636496	782	tags=13%, list=7%, signal=13%	RSAD2/FCN1/CD36/CD14/LYN/IFIH1/PYCARD/TLR2/CASP1/POSTN/GBP1/DDX58/TLR1/CSF1R/FN1/HTR2B/LCP2/PLEK/BTN3A2/SRGN/CCL5/GATA3/FGR/UCP2/MARCKS/RAPGEF4/HYAL2/SYK/M6PR/SYT11/CD34/RHBDF2/S100A8/CD38/ABCA1/HLA-E/RAP1A/LRRC32/TWIST1/CCL19/MAP4K4/CD58/ANGPT1/LGALS9/SOX4/CLEC5A/CARD8/ANXA4/VEGFC/BTN3A1/CD74/NOD2/TNFRSF21/SFRP1/CD40/CRTAM/TNFRSF4
GO:0006875	GO:0006875	cellular metal ion homeostasis	428	0.381727536	1.497447742	0.001253133	0.030113569	0.025636496	1178	tags=14%, list=11%, signal=13%	C3AR1/CD36/PTPRC/LYN/CD52/CCR1/PTGER2/CORO1A/FPR3/LPAR6/APLNR/CXCR4/HTR2B/GPR65/AGTR1/CCL5/HEPH/LTF/CLIC2/HMOX1/PTPN6/PDGFRA/C5AR1/PRKCB/ANXA6/CCL8/S1PR1/CCR5/S100A8/CD38/FPR1/CXCL12/CXCL10/CCL19/SLC31A1/GPR18/KCNJ2/GNA15/ATP6V0A2/SLC39A8/EDNRB/LCK/CCR2/BAK1/CD40/SWAP70/CCL21/CAV1/TMEM165/THY1/APP/NUBP1/FTH1/GPR4/BAX/NMU/CALM3/ATP1B3/MYO5A/ITPR3
GO:0043299	GO:0043299	leukocyte degranulation	438	0.511223506	2.009884229	0.001253133	0.030113569	0.025636496	1223	tags=26%, list=11%, signal=24%	TYROBP/CD53/ITGB2/HCK/C3AR1/FCER1G/FCN1/LYZ/CD36/CD14/PTPRC/LYN/PYCARD/GLIPR1/CTSS/DOCK2/TLR2/PLAC8/CD300A/CYBB/FGL2/CORO1A/PTX3/CFD/HBB/TNFRSF1B/FCGR3B/RAC2/GMFG/CD44/ITGAM/MNDA/HPSE/FGR/PECAM1/LTF/LAT2/NCKAP1L/HMOX1/PTPN6/CD93/MAN2B1/LILRB2/STK10/LAIR1/C5AR1/IL13RA2/CFP/SYK/CD68/RNASET2/ALOX5/NRAS/HK3/CMTM6/S100A8/GCA/PLEKHO2/SELL/PRCP/PYGL/RAP1A/FPR1/QPCT/S100A11/RHOG/BTK/DSP/CTSZ/CD58/C3/RAP2…
GO:0002694	GO:0002694	regulation of leukocyte activation	389	0.511086743	1.9919269	0.001259446	0.030113569	0.025636496	1159	tags=25%, list=11%, signal=23%	ITGB2/FCER1G/PTPRC/LYN/PYCARD/HLA-DQB1/CD300A/IGHM/PLSCR1/LST1/CORO1A/SAMSN1/HLA-DPA1/HLA-DQA1/RAC2/HLX/IDO1/HLA-DPB1/CCL5/ITGAM/MNDA/GATA3/FGR/ADA/NCKAP1L/MERTK/IGHA1/HLA-DMB/HMOX1/PTPN6/LILRB2/HLA-DRA/CD3D/HLA-DRB1/IL13RA2/CD86/SYK/SASH3/EBI3/ITPKB/CD38/HLA-E/VAV1/PELI1/TRBC1/LRRC32/MEF2C/IGHV3-23/CCL19/BTK/CD247/LGALS9/CD83/CBFB/LCK/CSK/IGKC/PPP2R3C/CCR2/ZEB1/GRB2/CCL2/CD74/AHR/NOD2/CD27/TNFRS…
GO:0009306	GO:0009306	protein secretion	413	0.419336097	1.641180445	0.001259446	0.030113569	0.025636496	782	tags=13%, list=7%, signal=13%	RSAD2/FCN1/CD36/CD14/LYN/IFIH1/PYCARD/TLR2/CASP1/POSTN/GBP1/DDX58/TLR1/CSF1R/FN1/HTR2B/LCP2/PLEK/BTN3A2/SRGN/CCL5/GATA3/FGR/UCP2/MARCKS/RAPGEF4/HYAL2/SYK/M6PR/SYT11/CD34/RHBDF2/CD38/ABCA1/HLA-E/RAP1A/LRRC32/TWIST1/CCL19/MAP4K4/CD58/ANGPT1/LGALS9/SOX4/CLEC5A/CARD8/ANXA4/VEGFC/BTN3A1/NOD2/TNFRSF21/SFRP1/CD40/CRTAM/TNFRSF4
GO:0050865	GO:0050865	regulation of cell activation	420	0.487128928	1.908313584	0.001259446	0.030113569	0.025636496	1159	tags=24%, list=11%, signal=22%	ITGB2/FCER1G/PTPRC/LYN/PYCARD/HLA-DQB1/CD300A/IGHM/PLSCR1/LST1/CORO1A/SAMSN1/HLA-DPA1/HLA-DQA1/RAC2/PLEK/HLX/IDO1/HLA-DPB1/CCL5/ITGAM/MNDA/GATA3/FGR/ADA/NCKAP1L/MERTK/IGHA1/HLA-DMB/HMOX1/PTPN6/LILRB2/HLA-DRA/CD3D/PDGFRA/HLA-DRB1/IL13RA2/CD86/SYK/SASH3/EBI3/ITPKB/CD38/HLA-E/VAV1/PELI1/TRBC1/LRRC32/MEF2C/IGHV3-23/CCL19/THBD/BTK/CD247/LGALS9/CD83/CBFB/LCK/CSK/IGKC/PPP2R3C/CCR2/ZEB1/GRB2/CCL2/CD74/AH…
GO:0050878	GO:0050878	regulation of body fluid levels	421	0.378938256	1.48387977	0.001262626	0.030113569	0.025636496	1021	tags=16%, list=9%, signal=15%	OAS2/FCER1G/COL1A2/CD36/LYN/TFPI2/PLSCR1/CCND1/HBB/APLNR/PDGFD/COL3A1/RAC2/LCP2/PLEK/SH2B3/A2M/HPSE/GATA3/ADA/MERTK/CAPZA1/PTPN6/HYAL2/ENTPD1/ADCY7/PDGFRA/SYK/PRKCB/PRKCH/CDO1/CD34/NME1/VAV1/PRCP/EHD3/HEG1/THBD/RHOG/FAP/GNA15/RAP2B/EDNRB/PLAUR/LCK/SERPING1/FLI1/PROCR/VWF/F8/MICAL1/CD40/PROS1/PF4/HDAC2/CLIC1/CBX5/EMP2/MAFG/PLAU/C1QBP/CAV1/SERPINE2/LAT/ADCY3/F13A1/TLR4
GO:0002283	GO:0002283	neutrophil activation involved in immune response	399	0.500035922	1.951150088	0.001265823	0.030113569	0.025636496	1859	tags=35%, list=17%, signal=30%	TYROBP/CD53/ITGB2/C3AR1/FCER1G/FCN1/LYZ/CD36/CD14/PTPRC/PYCARD/GLIPR1/CTSS/DOCK2/TLR2/PLAC8/CD300A/CYBB/FGL2/PTX3/CFD/HBB/TNFRSF1B/FCGR3B/GMFG/CD44/ITGAM/MNDA/HPSE/FGR/PECAM1/LTF/NCKAP1L/PTPN6/CD93/MAN2B1/LILRB2/STK10/LAIR1/C5AR1/CFP/SYK/CD68/RNASET2/ALOX5/NRAS/HK3/CMTM6/S100A8/GCA/PLEKHO2/SELL/PRCP/PYGL/RAP1A/FPR1/QPCT/S100A11/RHOG/DSP/CTSZ/CD58/C3/RAP2C/PSMC2/RAP2B/DEFA4/STOM/IDH1/PLAUR/CLEC5A/…
GO:0009617	GO:0009617	response to bacterium	422	0.468674132	1.834324611	0.001265823	0.030113569	0.025636496	1775	tags=29%, list=16%, signal=25%	ISG15/HCK/CX3CR1/FCER1G/LYZ/CD36/CD14/RNASE6/LYN/LY96/IL10RA/PYCARD/TLR2/PLAC8/CASP1/IGHM/LY86/PTGER2/TLR1/TNFRSF1B/IRF8/ADAMTS5/IDO1/CCL5/FGR/LTF/IGHA1/MYD88/LILRB2/TREM2/GCH1/C5AR1/CD86/CFP/SYK/HIST2H2BE/IGKV3-20/SYT11/TRIM5/CCR5/S100A8/ABCA1/HLA-E/PELI1/TRBC1/MEF2C/CXCL10/IGHV3-23/THBD/RPS6KA3/GNLY/LGALS9/DEFA4/EDNRB/CNP/STAB1/SPON2/SCARB2/CARD8/RPS19/IGKC/CCL2/NOD2/CD27/TNFRSF21/MGST2/CD40/MR…
GO:0042110	GO:0042110	T cell activation	375	0.489771818	1.907904731	0.001265823	0.030113569	0.025636496	1426	tags=26%, list=13%, signal=24%	RSAD2/FCER1G/PTPRC/LYN/PYCARD/LCP1/HLA-DQB1/DOCK2/CD300A/CORO1A/HLA-DPA1/HLA-DQA1/RAC2/CLEC7A/HLX/IDO1/HLA-DPB1/CCL5/GATA3/ADA/MICB/NCKAP1L/HLA-DMB/PTPN6/LILRB2/HLA-DRA/CD3D/HLA-DRB1/CD86/SYK/SASH3/EBI3/ITPKB/HLA-E/VAV1/PELI1/TRBC1/LRRC32/CCL19/JAG2/CD247/GPR18/LGALS9/SOX4/CD83/CBFB/LCK/CSK/CCR2/BTN3A1/ZEB1/GRB2/CCL2/CD74/NOD2/CD27/TNFRSF21/TNFRSF4/CD8A/MSN/NCK1/CASP3/VCAM1/SATB1/LILRB4/CCL21/LGA…
GO:0042119	GO:0042119	neutrophil activation	405	0.502397375	1.96215947	0.001265823	0.030113569	0.025636496	1859	tags=35%, list=17%, signal=30%	TYROBP/CD53/ITGB2/C3AR1/FCER1G/FCN1/LYZ/CD36/CD14/PTPRC/PYCARD/GLIPR1/CTSS/DOCK2/TLR2/PLAC8/CD300A/CYBB/FGL2/PTX3/CFD/HBB/TNFRSF1B/FCGR3B/GMFG/CD44/CCL5/ITGAM/MNDA/HPSE/FGR/PECAM1/LTF/NCKAP1L/PTPN6/CD93/MAN2B1/LILRB2/STK10/LAIR1/C5AR1/CFP/SYK/CD68/RNASET2/ALOX5/NRAS/HK3/CMTM6/S100A8/GCA/PLEKHO2/SELL/PRCP/PYGL/RAP1A/FPR1/QPCT/S100A11/RHOG/DSP/CTSZ/CD58/C3/RAP2C/PSMC2/RAP2B/DEFA4/STOM/IDH1/PLAUR/CL…
GO:0001525	GO:0001525	angiogenesis	396	0.407245131	1.58803136	0.001267427	0.030113569	0.025636496	1565	tags=26%, list=14%, signal=23%	ITGB2/C3AR1/CX3CR1/TGFBI/CYBB/MMRN2/TIE1/FN1/APLNR/PPARG/AGTR1/COL4A1/COL4A2/TYMP/COL15A1/HPSE/HMOX1/STAT1/MCAM/PDGFRA/C5AR1/SYK/PRKCB/CDH5/PLK2/VASH1/NRP1/S1PR1/NOTCH4/CD34/PRCP/TWIST1/KDR/CXCL10/HDAC9/FAP/SP100/C3/ANGPT1/CALCRL/RASIP1/CDH13/WARS/SOX18/CLIC4/MFGE8/PTN/SERPINF1/SPHK1/SOX17/PRKD2/PTEN/STAB1/BTG1/VEGFC/PRKX/CCR2/CCL2/ACVRL1/SFRP1/CD40/HEY1/PF4/SAT1/PDCD10/ANGPT2/EMP2/ENG/HTATIP2/TH…
GO:0036230	GO:0036230	granulocyte activation	410	0.501313286	1.95843334	0.001267427	0.030113569	0.025636496	1859	tags=35%, list=17%, signal=30%	TYROBP/CD53/ITGB2/C3AR1/FCER1G/FCN1/LYZ/CD36/CD14/PTPRC/PYCARD/GLIPR1/CTSS/DOCK2/TLR2/PLAC8/CD300A/CYBB/FGL2/PTX3/CFD/HBB/TNFRSF1B/FCGR3B/GMFG/CD44/CCL5/ITGAM/MNDA/HPSE/FGR/PECAM1/LTF/NCKAP1L/PTPN6/CD93/MAN2B1/LILRB2/STK10/LAIR1/C5AR1/CFP/SYK/CD68/RNASET2/ALOX5/NRAS/HK3/CMTM6/S100A8/GCA/PLEKHO2/SELL/PRCP/PYGL/RAP1A/FPR1/QPCT/S100A11/RHOG/DSP/CTSZ/CD58/C3/RAP2C/PSMC2/RAP2B/DEFA4/STOM/IDH1/PLAUR/CL…
GO:0043312	GO:0043312	neutrophil degranulation	396	0.499901697	1.949340853	0.001267427	0.030113569	0.025636496	1859	tags=35%, list=17%, signal=30%	TYROBP/CD53/ITGB2/C3AR1/FCER1G/FCN1/LYZ/CD36/CD14/PTPRC/PYCARD/GLIPR1/CTSS/DOCK2/TLR2/PLAC8/CD300A/CYBB/FGL2/PTX3/CFD/HBB/TNFRSF1B/FCGR3B/GMFG/CD44/ITGAM/MNDA/HPSE/FGR/PECAM1/LTF/NCKAP1L/PTPN6/CD93/MAN2B1/LILRB2/STK10/LAIR1/C5AR1/CFP/SYK/CD68/RNASET2/ALOX5/NRAS/HK3/CMTM6/S100A8/GCA/PLEKHO2/SELL/PRCP/PYGL/RAP1A/FPR1/QPCT/S100A11/RHOG/DSP/CTSZ/CD58/C3/RAP2C/PSMC2/RAP2B/DEFA4/STOM/IDH1/PLAUR/CLEC5A/…
GO:0002446	GO:0002446	neutrophil mediated immunity	409	0.49359737	1.927351784	0.001272265	0.030113569	0.025636496	1859	tags=34%, list=17%, signal=29%	TYROBP/CD53/ITGB2/C3AR1/FCER1G/FCN1/LYZ/CD36/CD14/PTPRC/PYCARD/GLIPR1/CTSS/DOCK2/TLR2/PLAC8/CD300A/CYBB/FGL2/PTX3/CFD/HBB/TNFRSF1B/FCGR3B/GMFG/CD44/ITGAM/MNDA/HPSE/FGR/PECAM1/LTF/NCKAP1L/PTPN6/CD93/MAN2B1/LILRB2/STK10/LAIR1/C5AR1/CFP/SYK/CD68/RNASET2/ALOX5/NRAS/HK3/CMTM6/S100A8/GCA/PLEKHO2/SELL/PRCP/PYGL/RAP1A/FPR1/QPCT/S100A11/RHOG/DSP/CTSZ/CD58/C3/RAP2C/PSMC2/RAP2B/DEFA4/STOM/IDH1/PLAUR/CLEC5A/…
GO:0002521	GO:0002521	leukocyte differentiation	400	0.464877936	1.811121266	0.001278772	0.030113569	0.025636496	1336	tags=23%, list=12%, signal=21%	TYROBP/RSAD2/FCER1G/PTPRC/LYN/HCLS1/DOCK2/EVI2B/TLR2/CCR1/IRF7/IFI16/CSF1R/RASSF2/PPARG/HLX/UBD/GATA3/CEBPA/ADA/DOCK10/LTF/NCKAP1L/MERTK/PTPN6/MFNG/LILRB2/TREM2/CD3D/CD86/SYK/SASH3/ITPKB/CEBPG/NME1/VAV1/MEF2C/CCL19/JAG2/BTK/HDAC9/GPR18/LGALS9/SOX4/CD83/ITM2A/CBFB/LCK/CD79B/FBN1/PPP2R3C/ZEB1/CD74/CD27/BAK1/SFRP1/CD8A/TSPAN2/TJP2/PF4/INPP5D/VCAM1/SATB1/LILRB4/LGALS1/BCL6/LYL1/APP/TESC/CASP8/SMAD7/O…
GO:0031349	GO:0031349	positive regulation of defense response	366	0.548299663	2.129315076	0.001285347	0.030113569	0.025636496	2018	tags=37%, list=18%, signal=32%	RSAD2/ITGB2/HCK/FCER1G/FCN1/CD36/CD14/LYN/IFIH1/LY96/PYCARD/CTSS/TLR2/IRF7/CD300A/CCL4/DDX58/IFI16/TLR1/PLSCR1/PLA2G7/FABP4/PSMB9/CLEC7A/AGTR1/IDO1/CCL5/ITGAM/ICAM2/LTF/DDX60/MYD88/HYAL2/PSME2/KRAS/SYK/DHX58/NRAS/TRIM5/S100A8/MARCO/HLA-E/VAV1/PELI1/CTSK/MEF2C/BTK/RFTN1/CLEC10A/RPS6KA3/LGMN/PSMB8/CLEC4A/C3/RNF125/PSMC2/PDE2A/PSMA7/GYPC/RPS19/TLR7/PSME1/CCR2/BIRC3/NOD2/MGST2/CRTAM/PSMA3/PSMD7/GPRC5…
GO:0072503	GO:0072503	cellular divalent inorganic cation homeostasis	355	0.400659362	1.549634696	0.001295337	0.030113569	0.025636496	1178	tags=14%, list=11%, signal=13%	C3AR1/CD36/PTPRC/LYN/CD52/CCR1/PTGER2/CORO1A/FPR3/LPAR6/APLNR/CXCR4/HTR2B/GPR65/AGTR1/CCL5/CLIC2/PTPN6/PDGFRA/C5AR1/PRKCB/ANXA6/CCL8/S1PR1/CCR5/S100A8/CD38/FPR1/CXCL12/CXCL10/CCL19/GPR18/GNA15/SLC39A8/EDNRB/LCK/CCR2/BAK1/CD40/SWAP70/CCL21/CAV1/TMEM165/THY1/APP/GPR4/BAX/NMU/CALM3/MYO5A/ITPR3
GO:0002791	GO:0002791	regulation of peptide secretion	362	0.431413629	1.670533545	0.001302083	0.030113569	0.025636496	1178	tags=17%, list=11%, signal=16%	RSAD2/FCN1/CD14/LYN/IFIH1/PYCARD/TLR2/CASP1/POSTN/GBP1/DDX58/TLR1/CSF1R/FN1/HTR2B/SRGN/CCL5/GATA3/FGR/UCP2/MARCKS/RAPGEF4/HYAL2/SYK/SYT11/CD34/RHBDF2/S100A8/CD38/HLA-E/RAP1A/LRRC32/TWIST1/CCL19/MAP4K4/CD58/ANGPT1/LGALS9/SOX4/CLEC5A/CARD8/ANXA4/VEGFC/CD74/NOD2/TNFRSF21/SFRP1/CD40/CRTAM/TNFRSF4/DNAJC1/AIM2/RAB11FIP1/TLR4/ANXA1/IRS1/ANO1/RAB8B/NMU/ERP29/ITPR3
GO:0050900	GO:0050900	leukocyte migration	362	0.5123665	1.984001821	0.001302083	0.030113569	0.025636496	1430	tags=30%, list=13%, signal=27%	ITGB2/HCK/C3AR1/CX3CR1/FCER1G/COL1A2/LYN/CD48/PYCARD/CCR1/CD300A/CCL4/IGHM/CORO1A/PLA2G7/FPR3/FN1/CXCR4/PDGFD/RAC2/CD44/CCL5/ITGAM/GATA3/ADA/PECAM1/NCKAP1L/MERTK/IGHA1/HMOX1/PTPN6/DOK2/STK10/C5AR1/KRAS/SYK/CKLF/IGKV3-20/IGLV2-14/CCL8/NRAS/S1PR1/CD34/JAM2/CCR5/S100A8/VAV1/SELL/FPR1/CXCL12/CXCL10/IGHV3-23/CCL19/THBD/IGLV1-40/GPR18/CD58/ANGPT1/LGALS9/EDNRB/LCK/TREM1/GYPC/RPS19/PROCR/VEGFC/IGKC/CCR2/…
GO:0018212	GO:0018212	peptidyl-tyrosine modification	317	0.413841732	1.587158357	0.00130719	0.030113569	0.025636496	965	tags=15%, list=9%, signal=14%	ITGB2/HCK/CD36/LYN/HCLS1/CD300A/TIE1/CSF1R/SAMSN1/PDGFD/CD44/CCL5/EIF2AK2/FGR/MERTK/SLA/PTPN6/HYAL2/TREM2/PDGFRA/SYK/MELK/NRP1/CNOT7/KDR/BTK/ANGPT1/RAP2C/RAP2B/LCK/VEGFC/CSK/GRB2/CD74/MAP2K1/SFRP1/CD40/MATK/HDAC2/CDC37/GPRC5B/FES/IL6ST/CAV1/THY1/FGFR3/APP
GO:0045785	GO:0045785	positive regulation of cell adhesion	317	0.465930093	1.786926702	0.00130719	0.030113569	0.025636496	1616	tags=29%, list=15%, signal=26%	CD36/PTPRC/LYN/PYCARD/HLA-DQB1/CORO1A/FN1/HLA-DPA1/HLA-DQA1/HLX/CD44/HLA-DPB1/CCL5/GATA3/ADA/NCKAP1L/HLA-DMB/PTPN6/LILRB2/HLA-DRA/CD3D/HLA-DRB1/CD86/SYK/SASH3/EBI3/NRP1/ITPKB/ARPC2/HLA-E/VAV1/TRBC1/CXCL12/KDR/CCL19/CD247/ANGPT1/CDH13/PTN/LGALS9/CD83/PRKD2/LCK/VEGFC/CSK/CCR2/GRB2/CCL2/CD74/NOD2/CD27/SFRP1/NCK1/VCAM1/LILRB4/CCL21/LIMS1/LGALS1/EMP2/IL6ST/BCL6/C1QBP/FAM49B/CAV1/THY1/MYO10/SMAD7/FADD/…
GO:0050708	GO:0050708	regulation of protein secretion	338	0.436618808	1.680822288	0.001308901	0.030113569	0.025636496	782	tags=14%, list=7%, signal=14%	RSAD2/FCN1/CD14/LYN/IFIH1/PYCARD/TLR2/CASP1/POSTN/GBP1/DDX58/TLR1/CSF1R/FN1/HTR2B/SRGN/CCL5/GATA3/FGR/UCP2/MARCKS/RAPGEF4/HYAL2/SYK/SYT11/CD34/RHBDF2/CD38/HLA-E/RAP1A/LRRC32/TWIST1/CCL19/MAP4K4/CD58/ANGPT1/LGALS9/SOX4/CLEC5A/CARD8/ANXA4/VEGFC/NOD2/TNFRSF21/SFRP1/CD40/CRTAM/TNFRSF4
GO:0051249	GO:0051249	regulation of lymphocyte activation	338	0.509933516	1.963057028	0.001308901	0.030113569	0.025636496	1346	tags=28%, list=12%, signal=25%	PTPRC/LYN/PYCARD/HLA-DQB1/CD300A/IGHM/LST1/CORO1A/SAMSN1/HLA-DPA1/HLA-DQA1/RAC2/HLX/IDO1/HLA-DPB1/CCL5/MNDA/GATA3/ADA/NCKAP1L/MERTK/IGHA1/HLA-DMB/PTPN6/LILRB2/HLA-DRA/CD3D/HLA-DRB1/CD86/SYK/SASH3/EBI3/ITPKB/CD38/HLA-E/VAV1/PELI1/TRBC1/LRRC32/MEF2C/IGHV3-23/CCL19/BTK/CD247/LGALS9/CD83/CBFB/LCK/CSK/IGKC/PPP2R3C/CCR2/ZEB1/GRB2/CCL2/CD74/AHR/NOD2/CD27/TNFRSF21/SFRP1/CD40/TNFRSF4/NCK1/INPP5D/CASP3/VCA…
GO:0098542	GO:0098542	defense response to other organism	338	0.653129955	2.514310803	0.001308901	0.030113569	0.025636496	779	tags=25%, list=7%, signal=24%	IFI44L/MX1/RSAD2/ISG15/MX2/ISG20/OAS3/OAS2/HERC5/FCER1G/LYZ/OAS1/CD36/PTPRC/APOBEC3A/RNASE6/IFIH1/PYCARD/IFIT1/IFIT3/TLR2/IRF7/IFITM1/PLAC8/IGHM/GBP1/DDX58/IFI16/TLR1/PLSCR1/RTP4/IFIT2/TRIM22/IRF8/CLEC7A/ADAMTS5/EIF2AK2/OASL/FGR/SAMHD1/MICB/LTF/APOBEC3G/DDX60/IGHA1/MYD88/IFITM3/HYAL2/STAT1/IFIT5/APOBEC3B/C5AR1/CFP/SYK/ADAR/HIST2H2BE/DHX58/IGKV3-20/SYT11/TRIM5/S100A8/HLA-E/PRF1/TRBC1/C19orf66/CNOT…
GO:0006874	GO:0006874	cellular calcium ion homeostasis	333	0.417062891	1.602503109	0.001310616	0.030113569	0.025636496	1178	tags=15%, list=11%, signal=14%	C3AR1/CD36/PTPRC/LYN/CD52/CCR1/PTGER2/CORO1A/FPR3/LPAR6/APLNR/CXCR4/HTR2B/GPR65/AGTR1/CCL5/CLIC2/PTPN6/PDGFRA/C5AR1/PRKCB/ANXA6/CCL8/S1PR1/CCR5/CD38/FPR1/CXCL12/CXCL10/CCL19/GPR18/GNA15/EDNRB/LCK/CCR2/BAK1/CD40/SWAP70/CCL21/CAV1/TMEM165/THY1/APP/GPR4/BAX/NMU/CALM3/MYO5A/ITPR3
GO:0045088	GO:0045088	regulation of innate immune response	337	0.583420996	2.243600669	0.001310616	0.030113569	0.025636496	1603	tags=33%, list=15%, signal=29%	RSAD2/ITGB2/HCK/FCER1G/FCN1/CD36/CD14/LYN/IFIH1/LY96/PYCARD/CTSS/TLR2/IRF7/CD300A/NMI/DDX58/IFI16/TLR1/PLSCR1/PSMB9/PPARG/CLEC7A/CCL5/ITGAM/A2M/ICAM2/FGR/SAMHD1/LTF/DDX60/MYD88/PTPN6/STAT1/PSME2/KRAS/SYK/ADAR/DHX58/NRAS/TRIM5/S100A8/MARCO/HLA-E/VAV1/PELI1/CTSK/CNOT7/BTK/RFTN1/CLEC10A/RPS6KA3/LGMN/PSMB8/CLEC4A/RNF125/PSMC2/LGALS9/PSMA7/GYPC/SERPING1/RPS19/TLR7/PSME1/BIRC3/NOD2/CRTAM/PSMA3/PSMD7/IF…
GO:0002429	GO:0002429	immune response-activating cell surface receptor signaling pathway	305	0.609926284	2.335944238	0.001312336	0.030113569	0.025636496	1271	tags=32%, list=12%, signal=30%	HCK/C3AR1/FCER1G/FCN1/PTPRC/LYN/HLA-DQB1/CD300A/IGHM/GBP1/PLSCR1/FPR3/BTN3A3/HLA-DPA1/HLA-DQA1/PSMB9/LCP2/CLEC7A/BTN3A2/HLA-DPB1/ARPC1B/MNDA/GATA3/ICAM2/FGR/ADA/MICB/LAT2/NCKAP1L/IGHA1/PTPN6/LPXN/HLA-DRA/CD3D/PSME2/C5AR1/HLA-DRB1/KRAS/SYK/PRKCB/PRKCH/IGKV3-20/IGLV2-14/NRAS/ARPC2/CD38/VAV1/TRBC1/RAP1A/FPR1/MEF2C/IGHV3-23/BTK/CD247/IGLV1-40/RFTN1/CLEC10A/PSMB8/CLEC4A/PSMC2/WIPF1/PRKD2/PSMA7/CBFB/LC…
GO:0002768	GO:0002768	immune response-regulating cell surface receptor signaling pathway	335	0.581701197	2.236069649	0.00131406	0.030113569	0.025636496	1509	tags=34%, list=14%, signal=30%	HCK/C3AR1/FCER1G/FCN1/PTPRC/LYN/HLA-DQB1/CD300A/IGHM/GBP1/PLSCR1/FPR3/BTN3A3/HLA-DPA1/HLA-DQA1/PSMB9/LCP2/CLEC7A/BTN3A2/HLA-DPB1/ARPC1B/MNDA/GATA3/ICAM2/FGR/ADA/MICB/LAT2/NCKAP1L/IGHA1/PTPN6/LPXN/LILRB2/HLA-DRA/CD3D/PSME2/C5AR1/HLA-DRB1/KRAS/SYK/PRKCB/PRKCH/IGKV3-20/IGLV2-14/NRAS/ARPC2/CD38/VAV1/TRBC1/RAP1A/FPR1/MEF2C/IGHV3-23/BTK/CD247/IGLV1-40/RFTN1/CLEC10A/PSMB8/CLEC4A/PSMC2/WIPF1/PRKD2/PSMA7/…
GO:0052548	GO:0052548	regulation of endopeptidase activity	306	0.398710232	1.527000197	0.00131406	0.030113569	0.025636496	1542	tags=26%, list=14%, signal=23%	IFI6/IFI27/LYN/COL6A3/PYCARD/CSTA/CASP1/IFI16/TFPI2/TNFRSF1B/PSMB9/PPARG/CD44/TNFAIP8/A2M/LTF/BID/PSME2/WFDC1/TNFSF10/CASP4/S100A8/CST7/CASP7/RPS6KA3/PSMB8/C3/PTTG1/TRIAP1/LGALS9/SERPINF1/TIMP1/PLAUR/LCK/ARL6IP1/SERPINH1/CARD8/SERPING1/CFLAR/PSME1/LXN/BIRC3/ARL6IP5/MICAL1/CD27/BAK1/PSMA3/PROS1/FAS/PSMD14/CASP3/AIM2/SERPINE2/RPS27L/APP/CASP8/GPX1/FADD/BAX/EPHA4/ANP32B/ARRB2/VCP/SORL1/PTGS2/MAP3K5/…
GO:1903706	GO:1903706	regulation of hemopoiesis	344	0.41455955	1.597075261	0.00131406	0.030113569	0.025636496	1682	tags=26%, list=15%, signal=22%	TYROBP/LYN/HCLS1/EVI2B/CCR1/IRF7/RASSF2/PSMB9/HLX/EIF2AK2/GATA3/ADA/LTF/NCKAP1L/PTPN6/STAT1/LILRB2/PSME2/CD86/SYK/PRKCB/SASH3/ITPKB/NME1/MEIS2/MEF2C/CCL19/BTK/PSMB8/PSMC2/LGALS9/CD83/PSMA7/CBFB/FBN1/PSME1/PPP2R3C/ZEB1/CD74/CD27/SFRP1/PSMA3/LMO2/PSMD7/TJP2/PF4/INPP5D/PSMD14/CDC73/LILRB4/FES/BCL6/PSMA5/TESC/CASP8/SMAD7/TLR4/PSMA6/JAG1/FADD/ANXA1/HLA-G/IL7R/IL18/PSMC6/TGFBR2/CD2/CYLD/HIST1H3G/TLR3/T…
GO:0055074	GO:0055074	calcium ion homeostasis	341	0.402706814	1.549880759	0.001315789	0.030113569	0.025636496	1178	tags=14%, list=11%, signal=13%	C3AR1/CD36/PTPRC/LYN/CD52/CCR1/PTGER2/CORO1A/FPR3/LPAR6/APLNR/CXCR4/HTR2B/GPR65/AGTR1/CCL5/CLIC2/PTPN6/PDGFRA/C5AR1/PRKCB/ANXA6/CCL8/S1PR1/CCR5/CD38/FPR1/CXCL12/CXCL10/CCL19/GPR18/GNA15/EDNRB/LCK/CCR2/BAK1/CD40/SWAP70/CCL21/CAV1/TMEM165/THY1/APP/GPR4/BAX/NMU/CALM3/MYO5A/ITPR3
GO:0018108	GO:0018108	peptidyl-tyrosine phosphorylation	315	0.415486685	1.590603942	0.001317523	0.030113569	0.025636496	965	tags=15%, list=9%, signal=14%	ITGB2/HCK/CD36/LYN/HCLS1/CD300A/TIE1/CSF1R/SAMSN1/PDGFD/CD44/CCL5/EIF2AK2/FGR/MERTK/SLA/PTPN6/HYAL2/TREM2/PDGFRA/SYK/MELK/NRP1/CNOT7/KDR/BTK/ANGPT1/RAP2C/RAP2B/LCK/VEGFC/CSK/GRB2/CD74/MAP2K1/SFRP1/CD40/MATK/HDAC2/CDC37/GPRC5B/FES/IL6ST/CAV1/THY1/FGFR3/APP
GO:0022407	GO:0022407	regulation of cell-cell adhesion	308	0.442133638	1.693505917	0.001317523	0.030113569	0.025636496	1346	tags=25%, list=12%, signal=23%	PTPRC/LYN/PYCARD/HLA-DQB1/CD300A/CORO1A/HLA-DPA1/HLA-DQA1/FXYD5/HLX/CD44/IDO1/HLA-DPB1/CCL5/GATA3/ADA/NCKAP1L/HLA-DMB/PTPN6/LILRB2/HLA-DRA/CD3D/HLA-DRB1/CD86/SYK/SASH3/EBI3/ITPKB/SNAI2/HLA-E/VAV1/PELI1/TRBC1/LRRC32/CXCL12/CCL19/CD247/LGALS9/CD83/LCK/CSK/CCR2/GRB2/CCL2/CD74/NOD2/CD27/TNFRSF21/SWAP70/NCK1/CASP3/VCAM1/LILRB4/CCL21/LGALS1/IL6ST/BCL6/FAM49B/CAV1/THY1/SERPINE2/MYO10/SMAD7/JAG1/FADD/ANX…
GO:0030099	GO:0030099	myeloid cell differentiation	308	0.419903237	1.608356737	0.001317523	0.030113569	0.025636496	1593	tags=23%, list=15%, signal=20%	TYROBP/LYN/HCLS1/EVI2B/TLR2/CCR1/IRF7/IFI16/CSF1R/RASSF2/PPARG/IRF8/UBD/GATA3/CEBPA/LTF/NCKAP1L/ACTN1/PTPN6/STAT1/PRKCB/ADAR/ITPKB/CEBPG/NME1/MEIS2/MEF2C/CCL19/CLEC5A/CBFB/FBN1/RPS19/FLI1/PRKX/CD74/SFRP1/TSPAN2/TJP2/PF4/INPP5D/CASP3/CDC73/LILRB4/FES/BCL6/APP/TESC/CASP8/OSTM1/TLR4/JAG1/FADD/SNRK/GPR183/TGFBR2/TMOD3/BATF3/BATF/HIST1H3G/PIP4K2A/TLR3/TAL1/B2M/HHEX/MED1/CTR9/SMAP1/RBPJ/MMP9/HDAC1/HMGB2
GO:0007599	GO:0007599	hemostasis	298	0.408023387	1.558236038	0.001319261	0.030113569	0.025636496	1021	tags=18%, list=9%, signal=17%	FCER1G/COL1A2/CD36/LYN/TFPI2/PLSCR1/HBB/PDGFD/COL3A1/RAC2/LCP2/PLEK/SH2B3/A2M/HPSE/GATA3/MERTK/CAPZA1/PTPN6/ENTPD1/PDGFRA/SYK/PRKCB/PRKCH/CD34/VAV1/PRCP/EHD3/THBD/RHOG/FAP/GNA15/RAP2B/PLAUR/LCK/SERPING1/FLI1/PROCR/VWF/F8/MICAL1/CD40/PROS1/PF4/HDAC2/CLIC1/CBX5/MAFG/PLAU/C1QBP/CAV1/SERPINE2/LAT/F13A1/TLR4
GO:0043900	GO:0043900	regulation of multi-organism process	303	0.582788601	2.228793918	0.001321004	0.030113569	0.025636496	991	tags=23%, list=9%, signal=22%	MX1/RSAD2/ISG15/ISG20/OAS3/OAS2/HERC5/FCN1/OAS1/CD36/APOBEC3A/LY96/PYCARD/IFIT1/IFITM1/CCL4/DDX58/IFI16/LY86/PLSCR1/PTX3/LHFPL2/IRF8/CCL5/EIF2AK2/OASL/ADA/MICB/LTF/APOBEC3G/DDX60/TRIM21/IFITM3/STAT1/IFIT5/ADAR/ARHGDIB/DHX58/SYT11/TRIM5/TRIM38/PRF1/C19orf66/CNOT7/TAF11/FCN3/TRIM14/RNF125/POLR2D/LGALS9/EDNRB/STOM/TIMP1/SCARB2/CARD8/PKN2/PPP2R3C/BIRC3/CD74/AIM2/LGALS1/LILRA2/TOP2A/C1QBP/VPS4B/POLR2F…
GO:0050817	GO:0050817	coagulation	297	0.407199624	1.554048436	0.001321004	0.030113569	0.025636496	1021	tags=18%, list=9%, signal=17%	FCER1G/COL1A2/CD36/LYN/TFPI2/PLSCR1/HBB/PDGFD/COL3A1/RAC2/LCP2/PLEK/SH2B3/A2M/HPSE/GATA3/MERTK/CAPZA1/PTPN6/ENTPD1/PDGFRA/SYK/PRKCB/PRKCH/CD34/VAV1/PRCP/EHD3/THBD/RHOG/FAP/GNA15/RAP2B/PLAUR/LCK/SERPING1/PROCR/VWF/F8/MICAL1/CD40/PROS1/PF4/HDAC2/CLIC1/CBX5/MAFG/PLAU/C1QBP/CAV1/SERPINE2/LAT/F13A1/TLR4
GO:0002237	GO:0002237	response to molecule of bacterial origin	295	0.458310599	1.746806349	0.001324503	0.030113569	0.025636496	1904	tags=31%, list=17%, signal=26%	HCK/CX3CR1/CD36/CD14/LYN/LY96/IL10RA/PYCARD/TLR2/CASP1/LY86/PTGER2/TLR1/TNFRSF1B/IRF8/IDO1/CCL5/LTF/LILRB2/TREM2/GCH1/C5AR1/CD86/TRIM5/CCR5/S100A8/ABCA1/PELI1/MEF2C/CXCL10/THBD/RPS6KA3/LGALS9/DEFA4/EDNRB/CNP/SPON2/SCARB2/CARD8/CCL2/NOD2/CD27/TNFRSF21/MGST2/CD40/TNFRSF4/FAS/IFNAR1/PF4/HDAC2/CASP3/VCAM1/CDC73/LILRA2/TNIP2/CASP8/TLR4/PLSCR3/IL18/ACP5/TNFRSF14/PTGS2/HDAC5/CDK4/CCL20/PDCD4/TNFRSF10B/C…
GO:0002683	GO:0002683	negative regulation of immune system process	331	0.486473823	1.864111063	0.001328021	0.030113569	0.025636496	1140	tags=22%, list=10%, signal=20%	FCER1G/CD14/PTPRC/LYN/LY96/IFIT1/CD300A/NMI/GBP1/IFI16/LST1/SAMSN1/COL3A1/PPARG/HLX/IDO1/MNDA/A2M/ADA/MICB/LTF/MERTK/HMOX1/PTPN6/LPXN/LILRB2/IL13RA2/CD86/ADAR/DHX58/ITPKB/NME1/HLA-E/PELI1/MEIS2/LRRC32/CNOT7/CXCL12/BTK/GPR18/ANGPT1/RNF125/LGALS9/FBN1/SERPING1/RPS19/CCR2/CCL2/CD74/NOD2/TNFRSF21/SFRP1/TJP2/PF4/INPP5D/CASP3/CDC73/LILRB4/CCL21/LILRA2/BCL6/C1QBP/THY1/GPX1/SMAD7/TLR4/FADD/ANXA1/HLA-G/IL…
GO:0052547	GO:0052547	regulation of peptidase activity	327	0.40011305	1.532210001	0.001328021	0.030113569	0.025636496	1542	tags=26%, list=14%, signal=23%	IFI6/IFI27/LYN/COL6A3/PYCARD/CSTA/CASP1/IFI16/TFPI2/FN1/TNFRSF1B/PSMB9/PPARG/CD44/TNFAIP8/A2M/LTF/BID/PSME2/WFDC1/TNFSF10/CASP4/S100A8/CST7/CASP7/PCOLCE/RPS6KA3/PSMB8/C3/PTTG1/TRIAP1/LGALS9/SERPINF1/TIMP1/PLAUR/LCK/ARL6IP1/SERPINH1/CARD8/SERPING1/CFLAR/PSME1/LXN/BIRC3/ARL6IP5/MICAL1/CD27/BAK1/PSMA3/PROS1/FAS/PSMD14/CASP3/AIM2/CAV1/SERPINE2/RPS27L/APP/CASP8/GPX1/ECM1/FADD/BAX/EPHA4/ANP32B/ARRB2/VC…
GO:0001819	GO:0001819	positive regulation of cytokine production	330	0.552457166	2.116503077	0.001331558	0.030113569	0.025636496	1072	tags=24%, list=10%, signal=22%	RSAD2/C3AR1/FCER1G/FCN1/CD36/CD14/IFIH1/LY96/PYCARD/TLR2/IRF7/CASP1/POSTN/CYBB/DDX58/IFI16/TLR1/CSF1R/HTR2B/HLA-DPA1/IRF8/IDO1/HLA-DPB1/EIF2AK2/HPSE/GATA3/FGR/DDX60/MYD88/HMOX1/HYAL2/STAT1/LILRB2/C5AR1/CD86/SYK/SASH3/DHX58/EBI3/CEBPG/LTB/CD34/HLA-E/PELI1/TWIST1/CCL19/HEG1/CD58/LUM/C3/RNF125/LGALS9/CD83/PRKD2/DDX41/CLEC5A/SPON2/CARD8/TLR7/CCR2/BIRC3/CD74/NOD2/CD40/CRTAM/PF4/HDAC2/GPRC5B/AIM2/IL6ST…
GO:0002250	GO:0002250	adaptive immune response	328	0.563310079	2.155974949	0.001333333	0.030113569	0.025636496	1502	tags=30%, list=14%, signal=26%	C1QA/RSAD2/C1QB/FCER1G/PTPRC/LYN/CD48/PYCARD/CTSS/HLA-DQB1/IRF7/IGHM/BTN3A3/SAMSN1/HLX/BTN3A2/GATA3/ADA/MICB/LAT2/IGHA1/PTPN6/LILRB2/LAIR1/CD3D/IL13RA2/CD86/SYK/PRKCB/SASH3/TAP1/EBI3/IGKV3-20/IGLV2-14/HLA-E/TRBC1/MEF2C/IGHV3-23/CCL19/BTK/CD247/IGLV1-40/RFTN1/CLEC10A/CLEC4A/C3/RNF125/PRKD2/CD79B/SERPING1/CSK/IGKC/CCR2/BTN3A1/CD74/CD27/TNFRSF21/CD40/CD8A/SWAP70/C2/INPP5D/LILRB4/EMP2/IGKV4-1/IL6ST/B…
GO:0002697	GO:0002697	regulation of immune effector process	294	0.584394947	2.223830813	0.001333333	0.030113569	0.025636496	1140	tags=27%, list=10%, signal=25%	C1QA/RSAD2/C1QB/ITGB2/HERC5/C3AR1/FCER1G/CD36/PTPRC/LYN/PYCARD/IFIT1/CD300A/DDX58/RAC2/HLX/ITGAM/A2M/GATA3/FGR/MICB/APOBEC3G/DDX60/HLA-DMB/HMOX1/PTPN6/STAT1/C5AR1/IL13RA2/CD86/CFP/SYK/CFH/SASH3/DHX58/IGKV3-20/IGLV2-14/CFB/HLA-E/VAV1/RAP1A/IGHV3-23/CCL19/BTK/IGLV1-40/C3/ANGPT1/RNF125/LGALS9/SPON2/GYPC/SERPING1/RPS19/IGKC/CCR2/BIRC3/CD74/NOD2/CD40/CRTAM/TNFRSF4/PROS1/C2/GPRC5B/FES/AIM2/IGKV4-1/BCL6…
GO:0007596	GO:0007596	blood coagulation	294	0.408302059	1.553734686	0.001333333	0.030113569	0.025636496	1021	tags=18%, list=9%, signal=17%	FCER1G/COL1A2/CD36/LYN/TFPI2/PLSCR1/HBB/PDGFD/COL3A1/RAC2/LCP2/PLEK/SH2B3/A2M/HPSE/GATA3/MERTK/CAPZA1/PTPN6/ENTPD1/PDGFRA/SYK/PRKCB/PRKCH/CD34/VAV1/PRCP/EHD3/THBD/RHOG/FAP/GNA15/RAP2B/PLAUR/LCK/SERPING1/PROCR/VWF/F8/MICAL1/CD40/PROS1/PF4/HDAC2/CLIC1/CBX5/MAFG/PLAU/C1QBP/CAV1/SERPINE2/LAT/F13A1/TLR4
GO:0045089	GO:0045089	positive regulation of innate immune response	277	0.588666833	2.231277272	0.001333333	0.030113569	0.025636496	2004	tags=40%, list=18%, signal=33%	RSAD2/ITGB2/HCK/FCER1G/FCN1/CD36/CD14/LYN/IFIH1/LY96/PYCARD/CTSS/TLR2/IRF7/CD300A/DDX58/IFI16/TLR1/PLSCR1/PSMB9/CLEC7A/CCL5/ITGAM/ICAM2/LTF/DDX60/MYD88/PSME2/KRAS/SYK/DHX58/NRAS/TRIM5/S100A8/MARCO/HLA-E/VAV1/PELI1/CTSK/BTK/RFTN1/CLEC10A/RPS6KA3/LGMN/PSMB8/CLEC4A/RNF125/PSMC2/PSMA7/GYPC/RPS19/TLR7/PSME1/BIRC3/NOD2/CRTAM/PSMA3/PSMD7/PSMD14/AIM2/LILRA2/TNIP2/PSMA5/C1QBP/CAV1/MMP2/CTSB/CASP8/TLR4/PSM…
GO:0050727	GO:0050727	regulation of inflammatory response	281	0.508776502	1.933847326	0.001333333	0.030113569	0.025636496	1610	tags=30%, list=15%, signal=26%	C1QA/C1QB/HCK/C3AR1/FCER1G/LYN/PYCARD/TLR2/CASP1/CCL4/PLA2G7/FABP4/TNFRSF1B/PPARG/AGTR1/IDO1/CCL5/A2M/GATA3/ADA/MYD88/HYAL2/C5AR1/CFP/CFH/CDH5/IGKV3-20/IGLV2-14/MGLL/WFDC1/CFB/CASP4/S100A8/NR1D2/IGHV3-23/BTK/IGLV1-40/C3/CALCRL/SERPINF1/EDNRB/PDE2A/SERPING1/RPS19/NT5E/TLR7/IGKC/CCR2/BIRC3/NOD2/MGST2/PROS1/C2/GPRC5B/IGKV4-1/IL6ST/BCL6/CCL18/C1QBP/GPX1/TLR4/PSMA6/ANXA1/DNASE1L3/IL18/ACP5/PTGS2/IGHV1…
GO:0032496	GO:0032496	response to lipopolysaccharide	282	0.457147868	1.737875304	0.001338688	0.030113569	0.025636496	1904	tags=31%, list=17%, signal=26%	HCK/CX3CR1/CD36/CD14/LYN/LY96/IL10RA/PYCARD/TLR2/CASP1/LY86/PTGER2/TNFRSF1B/IRF8/IDO1/CCL5/LTF/LILRB2/TREM2/GCH1/C5AR1/CD86/TRIM5/CCR5/S100A8/ABCA1/PELI1/MEF2C/CXCL10/THBD/RPS6KA3/LGALS9/DEFA4/EDNRB/CNP/SPON2/SCARB2/CARD8/CCL2/CD27/TNFRSF21/MGST2/CD40/TNFRSF4/FAS/IFNAR1/PF4/HDAC2/CASP3/VCAM1/CDC73/LILRA2/TNIP2/CASP8/TLR4/PLSCR3/IL18/ACP5/TNFRSF14/PTGS2/HDAC5/CDK4/CCL20/PDCD4/TNFRSF10B/CD180/SPARC…
GO:0007159	GO:0007159	leukocyte cell-cell adhesion	271	0.513600642	1.942283042	0.001340483	0.030113569	0.025636496	1346	tags=29%, list=12%, signal=26%	ITGB2/PTPRC/LYN/PYCARD/HLA-DQB1/CD300A/CORO1A/HLA-DPA1/HLA-DQA1/RAC2/HLX/CD44/IDO1/HLA-DPB1/CCL5/GATA3/ADA/PECAM1/NCKAP1L/HLA-DMB/PTPN6/LILRB2/STK10/HLA-DRA/CD3D/HLA-DRB1/CD86/SYK/SASH3/EBI3/ITPKB/S100A8/HLA-E/VAV1/SELL/PELI1/TRBC1/LRRC32/CXCL12/CCL19/CD247/LGALS9/CD83/LCK/NT5E/CSK/CCR2/GRB2/CCL2/CD74/NOD2/CD27/TNFRSF21/MSN/NCK1/CASP3/VCAM1/LILRB4/CCL21/LGALS1/IL6ST/BCL6/FAM49B/CAV1/THY1/ITGAL/SM…
GO:0030098	GO:0030098	lymphocyte differentiation	271	0.456008766	1.724487902	0.001340483	0.030113569	0.025636496	1558	tags=26%, list=14%, signal=23%	RSAD2/FCER1G/PTPRC/DOCK2/HLX/GATA3/ADA/DOCK10/NCKAP1L/MERTK/PTPN6/MFNG/LILRB2/CD3D/CD86/SYK/SASH3/ITPKB/CEBPG/VAV1/CCL19/JAG2/BTK/HDAC9/GPR18/LGALS9/SOX4/CD83/ITM2A/CBFB/LCK/CD79B/PPP2R3C/ZEB1/CD74/CD27/BAK1/SFRP1/CD8A/INPP5D/VCAM1/SATB1/LILRB4/LGALS1/BCL6/LYL1/SMAD7/IL18R1/FADD/ANXA1/HLA-G/BAX/IL7R/IL18/GPR183/TGFBR2/CD2/RHOH/HDAC5/CYLD/BLNK/BATF/ITGA4/B2M/HHEX/TBX21/FCGR2B/FLT3LG/RBPJ/BCL11B
GO:0050867	GO:0050867	positive regulation of cell activation	268	0.547312563	2.069524118	0.001342282	0.030113569	0.025636496	1346	tags=31%, list=12%, signal=28%	ITGB2/FCER1G/PTPRC/LYN/PYCARD/HLA-DQB1/IGHM/CORO1A/HLA-DPA1/HLA-DQA1/PLEK/HLX/HLA-DPB1/CCL5/ITGAM/GATA3/FGR/ADA/NCKAP1L/IGHA1/HLA-DMB/PTPN6/LILRB2/HLA-DRA/CD3D/HLA-DRB1/CD86/SYK/SASH3/EBI3/ITPKB/CD38/HLA-E/VAV1/PELI1/TRBC1/MEF2C/IGHV3-23/CCL19/BTK/CD247/LGALS9/CD83/LCK/CSK/IGKC/PPP2R3C/CCR2/GRB2/CCL2/CD74/NOD2/CD27/CD40/TNFRSF4/NCK1/INPP5D/VCAM1/LILRB4/CCL21/LGALS1/TNIP2/IL6ST/BCL6/FAM49B/CAV1/TH…
GO:0019058	GO:0019058	viral life cycle	254	0.550980766	2.069535094	0.001364256	0.030113569	0.025636496	1248	tags=25%, list=11%, signal=23%	MX1/RSAD2/ISG15/ISG20/OAS3/OAS2/FCN1/OAS1/APOBEC3A/IFIT1/IFITM1/IFI16/PLSCR1/PTX3/CXCR4/CCL5/EIF2AK2/OASL/LTF/APOBEC3G/TRIM21/IFITM3/HYAL2/IFIT5/CD86/ADAR/TRIM5/TRIM38/CCR5/C19orf66/CNOT7/FCN3/KPNA2/CHMP5/LGALS9/STOM/CLEC5A/SCARB2/PKN2/NUP93/CCL2/CD74/TNFRSF4/DEK/LGALS1/NUP155/TOP2A/VPS4B/CAV1/NUP214/CTSB/NUP88/CAV2/ZC3HAV1/NPC1/NUP153/SIVA1/VPS37B/VCP/TNFRSF14/DYNLT1/NUP43/NUP107
GO:0051480	GO:0051480	regulation of cytosolic calcium ion concentration	264	0.457490962	1.719836619	0.00136612	0.030113569	0.025636496	1178	tags=16%, list=11%, signal=14%	C3AR1/CD36/PTPRC/LYN/CD52/CCR1/PTGER2/CORO1A/FPR3/LPAR6/APLNR/CXCR4/HTR2B/GPR65/AGTR1/CLIC2/PTPN6/PDGFRA/C5AR1/S1PR1/CCR5/CD38/FPR1/CXCL10/CCL19/GPR18/GNA15/EDNRB/LCK/CCR2/BAK1/SWAP70/CCL21/CAV1/THY1/GPR4/BAX/NMU/CALM3/MYO5A/ITPR3
GO:0007204	GO:0007204	positive regulation of cytosolic calcium ion concentration	241	0.489324338	1.830176818	0.001367989	0.030113569	0.025636496	1178	tags=17%, list=11%, signal=16%	C3AR1/CD36/PTPRC/LYN/CD52/CCR1/PTGER2/CORO1A/FPR3/LPAR6/APLNR/CXCR4/HTR2B/GPR65/AGTR1/CLIC2/PTPN6/PDGFRA/C5AR1/S1PR1/CCR5/CD38/FPR1/CXCL10/CCL19/GPR18/GNA15/EDNRB/LCK/CCR2/BAK1/SWAP70/CCL21/CAV1/THY1/GPR4/BAX/NMU/CALM3/MYO5A/ITPR3
GO:0070372	GO:0070372	regulation of ERK1 and ERK2 cascade	241	0.407340588	1.523540201	0.001367989	0.030113569	0.025636496	1140	tags=19%, list=10%, signal=17%	CD36/LYN/PYCARD/CCR1/CCL4/GBP1/TIE1/CSF1R/FN1/HTR2B/PDGFD/CD44/CCL5/MERTK/PTPN6/TREM2/PDGFRA/C5AR1/SYK/CCL8/NRP1/MARCO/RAP1A/KDR/CCL19/SPRY1/ANGPT1/DUSP6/LGALS9/PRKD2/PTEN/CFLAR/CSK/CCL2/CD74/NOD2/MAP2K1/CCL21/CCL18/FGFR3/APP/TLR4/EPHA4/GPR183/ARRB2
GO:1903037	GO:1903037	regulation of leukocyte cell-cell adhesion	241	0.525162854	1.964220466	0.001367989	0.030113569	0.025636496	1346	tags=29%, list=12%, signal=26%	PTPRC/LYN/PYCARD/HLA-DQB1/CD300A/CORO1A/HLA-DPA1/HLA-DQA1/HLX/CD44/IDO1/HLA-DPB1/CCL5/GATA3/ADA/NCKAP1L/HLA-DMB/PTPN6/LILRB2/HLA-DRA/CD3D/HLA-DRB1/CD86/SYK/SASH3/EBI3/ITPKB/HLA-E/VAV1/PELI1/TRBC1/LRRC32/CXCL12/CCL19/CD247/LGALS9/CD83/LCK/CSK/CCR2/GRB2/CCL2/CD74/NOD2/CD27/TNFRSF21/NCK1/CASP3/VCAM1/LILRB4/CCL21/LGALS1/IL6ST/BCL6/FAM49B/CAV1/THY1/SMAD7/FADD/ANXA1/HLA-G/IL7R/IL18/TNFRSF14/TGFBR2/CYLD…
GO:0032103	GO:0032103	positive regulation of response to external stimulus	243	0.44188149	1.651284301	0.001371742	0.030113569	0.025636496	1784	tags=31%, list=16%, signal=27%	C3AR1/FCER1G/LY96/TLR2/CCR1/CCL4/LY86/PLA2G7/FABP4/PDGFD/RAC2/AGTR1/IDO1/CCL5/DDX60/NCKAP1L/MYD88/HYAL2/C5AR1/DHX58/NRP1/S1PR1/S100A8/CXCL12/KDR/CXCL10/CCL19/THBD/BTK/C3/CDH13/LGALS9/PDE2A/PRKD2/RPS19/VEGFC/TLR7/CCR2/CD74/NOD2/MGST2/SWAP70/PF4/GPRC5B/ADAM10/CCL21/IL16/IL6ST/CCL18/C1QBP/TLR4/IL18/PTGS2/PGF/SCARF1/TLR3/PDCD4/TNFSF14/CD180/FPR2/FKBP1B/PPM1F/IL1B/CX3CL1/STX4/TGM2/TICAM1/CD47/MAPK13/D…
GO:0045765	GO:0045765	regulation of angiogenesis	226	0.440431724	1.633860266	0.00137741	0.030113569	0.025636496	1565	tags=29%, list=14%, signal=25%	ITGB2/C3AR1/CX3CR1/CYBB/MMRN2/TIE1/APLNR/PPARG/AGTR1/COL4A2/HMOX1/STAT1/C5AR1/PRKCB/CDH5/PLK2/VASH1/NRP1/CD34/TWIST1/KDR/CXCL10/HDAC9/SP100/C3/WARS/PTN/SERPINF1/SPHK1/PRKD2/STAB1/BTG1/VEGFC/CCR2/ACVRL1/SFRP1/CD40/PF4/PDCD10/ANGPT2/EMP2/ENG/HTATIP2/THBS2/PLXND1/ECM1/ANXA1/GPR4/RAMP2/PTGS2/TGFBR2/ERAP1/HDAC5/PGF/TLR3/TNFRSF12A/SPARC/HHEX/HK2/IL1B/CX3CL1/ANXA3/NOS3/TNFSF12/ITGA5
GO:0050863	GO:0050863	regulation of T cell activation	256	0.510466079	1.915093855	0.00137931	0.030113569	0.025636496	1346	tags=28%, list=12%, signal=25%	PTPRC/LYN/PYCARD/HLA-DQB1/CD300A/CORO1A/HLA-DPA1/HLA-DQA1/RAC2/HLX/IDO1/HLA-DPB1/CCL5/GATA3/ADA/NCKAP1L/HLA-DMB/PTPN6/LILRB2/HLA-DRA/CD3D/HLA-DRB1/CD86/SYK/SASH3/EBI3/ITPKB/HLA-E/VAV1/PELI1/TRBC1/LRRC32/CCL19/CD247/LGALS9/CD83/CBFB/LCK/CSK/CCR2/ZEB1/GRB2/CCL2/CD74/NOD2/CD27/TNFRSF21/NCK1/CASP3/VCAM1/LILRB4/CCL21/LGALS1/IL6ST/BCL6/FAM49B/CAV1/THY1/LAT/SMAD7/FADD/ANXA1/HLA-G/IL7R/IL18/TNFRSF14/TGFB…
GO:0002696	GO:0002696	positive regulation of leukocyte activation	259	0.558526111	2.09351745	0.001381215	0.030113569	0.025636496	1346	tags=32%, list=12%, signal=28%	ITGB2/FCER1G/PTPRC/LYN/PYCARD/HLA-DQB1/IGHM/CORO1A/HLA-DPA1/HLA-DQA1/HLX/HLA-DPB1/CCL5/ITGAM/GATA3/FGR/ADA/NCKAP1L/IGHA1/HLA-DMB/PTPN6/LILRB2/HLA-DRA/CD3D/HLA-DRB1/CD86/SYK/SASH3/EBI3/ITPKB/CD38/HLA-E/VAV1/PELI1/TRBC1/MEF2C/IGHV3-23/CCL19/BTK/CD247/LGALS9/CD83/LCK/CSK/IGKC/PPP2R3C/CCR2/GRB2/CCL2/CD74/NOD2/CD27/CD40/TNFRSF4/NCK1/INPP5D/VCAM1/LILRB4/CCL21/LGALS1/TNIP2/IL6ST/BCL6/FAM49B/CAV1/THY1/AP…
GO:0070661	GO:0070661	leukocyte proliferation	227	0.488781353	1.812749333	0.001385042	0.030113569	0.025636496	1497	tags=28%, list=14%, signal=24%	PTPRC/LYN/PYCARD/DOCK2/CD300A/LST1/CORO1A/HLA-DPA1/RAC2/IDO1/HLA-DPB1/CCL5/MNDA/ADA/NCKAP1L/HLA-DMB/PTPN6/LILRB2/CD86/SYK/SASH3/EBI3/CCL8/CD38/HLA-E/PELI1/LRRC32/MEF2C/CCL19/BTK/LGALS9/CCR2/BTN3A1/CD74/AHR/TNFRSF21/CD40/TNFRSF4/MSN/NCK1/INPP5D/CASP3/VCAM1/SATB1/IL6ST/BCL6/TLR4/FADD/ANXA1/HLA-G/BAX/IL7R/IL18/GPR183/TGFBR2/TNFSF14/ELF4/CD180/SLC11A1/FKBP1B/IL1B/FCGR2B/FLT3LG
GO:0002218	GO:0002218	activation of innate immune response	235	0.595136715	2.215208722	0.001386963	0.030113569	0.025636496	1060	tags=27%, list=10%, signal=25%	RSAD2/ITGB2/HCK/FCER1G/FCN1/CD36/CD14/LYN/IFIH1/LY96/PYCARD/CTSS/TLR2/IRF7/CD300A/DDX58/IFI16/TLR1/PSMB9/CLEC7A/ITGAM/ICAM2/LTF/DDX60/MYD88/PSME2/KRAS/SYK/DHX58/NRAS/TRIM5/S100A8/MARCO/PELI1/CTSK/BTK/RFTN1/CLEC10A/RPS6KA3/LGMN/PSMB8/CLEC4A/RNF125/PSMC2/PSMA7/TLR7/PSME1/BIRC3/NOD2/PSMA3/PSMD7/PSMD14/AIM2/LILRA2/TNIP2/PSMA5/C1QBP/CAV1/CTSB/CASP8/TLR4/PSMA6/FADD/COLEC12
GO:0071356	GO:0071356	cellular response to tumor necrosis factor	230	0.460116678	1.707498582	0.001386963	0.030113569	0.025636496	1820	tags=33%, list=17%, signal=28%	PYCARD/CASP1/POSTN/CCL4/FABP4/TNFRSF1B/PSMB9/CCL5/GATA3/CEBPA/HYAL2/STAT1/PSME2/SYK/CCL8/CASP4/LTB/PID1/CCL19/CD58/PSMB8/PSMC2/SPHK1/PSMA7/CARD8/PSME1/BIRC3/CCL2/CD27/TNFRSF21/SFRP1/CD40/PSMA3/TNFRSF4/PSMD7/FAS/TJP2/PSMD14/VCAM1/CCL21/LIMS1/AIM2/CCL18/PSMA5/CASP8/TRAF1/PSMA6/TNFRSF14/RBCK1/PSMC6/MAP3K5/CYLD/CCL20/TNFRSF12A/TNFSF14/IKBKB/TNFRSF10B/TNFRSF17/INPP5K/PSMB4/PSMC4/CX3CL1/PSMA4/SNRNP70/T…
GO:1901342	GO:1901342	regulation of vasculature development	247	0.430999139	1.608663237	0.001386963	0.030113569	0.025636496	1565	tags=28%, list=14%, signal=25%	ITGB2/C3AR1/CX3CR1/CYBB/MMRN2/TIE1/APLNR/PDGFD/PPARG/AGTR1/COL4A2/HMOX1/STAT1/C5AR1/PRKCB/CDH5/PLK2/VASH1/NRP1/CD34/RAP1A/TWIST1/KDR/CXCL10/HDAC9/SP100/C3/WARS/PTN/SERPINF1/SPHK1/PRKD2/STAB1/BTG1/VEGFC/CFLAR/CCR2/ACVRL1/SFRP1/CD40/HEY1/PF4/PDCD10/ANGPT2/EMP2/ENG/HTATIP2/THBS2/PLXND1/ECM1/ANXA1/GPR4/RAMP2/PTGS2/TGFBR2/ERAP1/HDAC5/PGF/TLR3/PDCD4/TNFRSF12A/SPARC/HHEX/HK2/IL1B/CX3CL1/ANXA3/NOS3/TNFSF…
GO:0009615	GO:0009615	response to virus	245	0.711339355	2.654704182	0.001388889	0.030113569	0.025636496	695	tags=26%, list=6%, signal=25%	IFI44L/MX1/IFI44/RSAD2/ISG15/MX2/ISG20/OAS3/OAS2/HERC5/OAS1/PTPRC/APOBEC3A/RNASE6/IFIH1/PYCARD/IFIT1/IFIT3/IRF7/IFITM1/CCL4/GBP1/DDX58/IFI16/PLSCR1/RTP4/IFIT2/CXCR4/TRIM22/CCL5/EIF2AK2/OASL/GATA3/FGR/SAMHD1/MICB/APOBEC3G/DDX60/ACTA2/IFITM3/HYAL2/STAT1/IFIT5/APOBEC3B/ADAR/DHX58/CCL8/TRIM5/PRF1/C19orf66/CNOT7/CXCL12/CXCL10/CCL19/FCN3/RNF125/LGALS9/IRF9/DDX41/RNASE2/SPON2/TLR7/BIRC3
GO:0034612	GO:0034612	response to tumor necrosis factor	246	0.476947179	1.77939802	0.001390821	0.030113569	0.025636496	1820	tags=34%, list=17%, signal=29%	CD14/PYCARD/CASP1/POSTN/CCL4/FABP4/TNFRSF1B/PSMB9/CCL5/UBD/GATA3/CEBPA/HYAL2/STAT1/GCH1/PSME2/SYK/CCL8/CASP4/LTB/PID1/CCL19/CD58/PSMB8/PSMC2/SPHK1/PSMA7/CARD8/PSME1/BIRC3/CCL2/CD27/TNFRSF21/SFRP1/CD40/PSMA3/TNFRSF4/PSMD7/FAS/TJP2/PSMD14/CASP3/ADAM10/VCAM1/CCL21/LIMS1/AIM2/CCL18/PSMA5/CASP8/TRAF1/PSMA6/TNFRSF14/PTGS2/RBCK1/PSMC6/MAP3K5/CYLD/CCL20/TNFRSF12A/TNFSF14/IKBKB/TNFRSF10B/TNFRSF17/INPP5K/P…
GO:0051251	GO:0051251	positive regulation of lymphocyte activation	231	0.563587509	2.092209772	0.001390821	0.030113569	0.025636496	1346	tags=33%, list=12%, signal=29%	PTPRC/LYN/PYCARD/HLA-DQB1/IGHM/CORO1A/HLA-DPA1/HLA-DQA1/HLX/HLA-DPB1/CCL5/GATA3/ADA/NCKAP1L/IGHA1/HLA-DMB/PTPN6/LILRB2/HLA-DRA/CD3D/HLA-DRB1/CD86/SYK/SASH3/EBI3/ITPKB/CD38/HLA-E/VAV1/PELI1/TRBC1/MEF2C/IGHV3-23/CCL19/BTK/CD247/LGALS9/CD83/LCK/CSK/IGKC/PPP2R3C/CCR2/GRB2/CCL2/CD74/NOD2/CD27/CD40/TNFRSF4/NCK1/INPP5D/VCAM1/LILRB4/CCL21/LGALS1/TNIP2/IL6ST/BCL6/FAM49B/CAV1/THY1/TLR4/FADD/ANXA1/HLA-G/IL7…
GO:0006898	GO:0006898	receptor-mediated endocytosis	225	0.438304338	1.62063569	0.0013947	0.030113569	0.025636496	1531	tags=26%, list=14%, signal=23%	ITGB2/CD163/FCER1G/CD36/CD14/HBB/HBA2/HTR2B/APOC1/IGHA1/SYK/IGKV3-20/IGLV2-14/M6PR/SYT11/MARCO/FOLR2/ADRB2/IGHV3-23/CCL19/IGLV1-40/ARAP3/ANGPT1/CALCRL/LGALS3BP/MICALL1/STAB1/SCARB2/RAB31/IGKC/SDCBP/GRB2/CCL21/IGKV4-1/CAV1/SCARA3/CAV2/APOL1/DNM3/COLEC12/ARRB2/RAMP2/CD5L/SORL1/TGFBR2/PPT1/IGHV1-69/IGHV3-9/ITGA4/SCARF1/SPARC/B2M/MSR1/FPR2/IGF2R/FCGR2B/GPR107/IGLV3-19/SMAP1
GO:0002758	GO:0002758	innate immune response-activating signal transduction	223	0.599060557	2.214761468	0.001398601	0.030113569	0.025636496	1060	tags=27%, list=10%, signal=25%	RSAD2/ITGB2/HCK/FCER1G/FCN1/CD36/CD14/LYN/IFIH1/LY96/CTSS/TLR2/IRF7/CD300A/DDX58/TLR1/PSMB9/CLEC7A/ITGAM/ICAM2/LTF/DDX60/MYD88/PSME2/KRAS/SYK/DHX58/NRAS/TRIM5/S100A8/MARCO/PELI1/CTSK/BTK/RFTN1/CLEC10A/RPS6KA3/LGMN/PSMB8/CLEC4A/RNF125/PSMC2/PSMA7/TLR7/PSME1/BIRC3/NOD2/PSMA3/PSMD7/PSMD14/LILRA2/TNIP2/PSMA5/C1QBP/CAV1/CTSB/CASP8/TLR4/PSMA6/FADD/COLEC12
GO:0006909	GO:0006909	phagocytosis	220	0.640137149	2.360885175	0.001398601	0.030113569	0.025636496	1537	tags=38%, list=14%, signal=33%	ITGB2/HCK/FCER1G/FCN1/CD36/CD14/LYN/PYCARD/DOCK2/NCF2/TLR2/CD300A/IGHM/CORO1A/PTX3/PPARG/RAC2/IRF8/CLEC7A/ARPC1B/ITGAM/FGR/CORO1C/PECAM1/NCKAP1L/MERTK/IGHA1/CD93/NCF4/TREM2/SYK/IGKV3-20/IGLV2-14/SYT11/ARHGAP25/ARPC2/ABCA1/MARCO/VAV1/TRBC1/RAP1A/IGHV3-23/RHOG/CD247/IGLV1-40/FCN3/C3/MFGE8/WIPF1/PTEN/SPON2/SCARB2/CSK/IGKC/GRB2/CCL2/C2/NCK1/ACTR3/ATG3/IGKV4-1/MYO10/ITGAL/CD302/ANXA1/COLEC12/CYFIP1/BI…
GO:0002460	GO:0002460	adaptive immune response based on somatic recombination of immune receptors built from immunoglobulin superfamily domains	202	0.583966205	2.136106796	0.001402525	0.030113569	0.025636496	1502	tags=32%, list=14%, signal=28%	C1QA/RSAD2/C1QB/FCER1G/PTPRC/HLA-DQB1/IRF7/IGHM/BTN3A3/HLX/BTN3A2/GATA3/ADA/MICB/IGHA1/PTPN6/IL13RA2/SASH3/EBI3/IGKV3-20/IGLV2-14/HLA-E/TRBC1/MEF2C/IGHV3-23/CCL19/BTK/IGLV1-40/RFTN1/C3/SERPING1/IGKC/CCR2/CD74/CD27/CD40/CD8A/SWAP70/C2/INPP5D/EMP2/IGKV4-1/BCL6/C1QBP/FAM49B/SMAD7/TLR4/IL18R1/JAG1/FADD/ANXA1/IL7R/IL18/IGHV1-69/IGHV3-9/TRDC/BATF/SLC11A1/B2M/TBX21/IL1B/NBN/FCGR2B/IGLV3-19
GO:0051091	GO:0051091	positive regulation of DNA binding transcription factor activity	203	0.431685151	1.579226881	0.00140647	0.030113569	0.025636496	1034	tags=17%, list=9%, signal=15%	ITGB2/CD36/PYCARD/TLR2/DDX58/TRIM22/PPARG/EIF2AK2/LTF/TRIM21/MYD88/KRAS/PRKCB/PRKCH/CEBPG/TRIM5/TRIM38/S100A8/BTK/TRIM14/LGALS9/SPHK1/PRKD2/PTEN/CFLAR/COPS5/NOD2/RWDD1/CD40/AIM2/APP/TRAF1/TLR4/PSMA6
GO:1902105	GO:1902105	regulation of leukocyte differentiation	203	0.462118701	1.690561447	0.00140647	0.030113569	0.025636496	1336	tags=24%, list=12%, signal=22%	TYROBP/LYN/HCLS1/EVI2B/CCR1/IRF7/RASSF2/HLX/GATA3/ADA/LTF/NCKAP1L/PTPN6/LILRB2/CD86/SYK/SASH3/ITPKB/NME1/CCL19/BTK/LGALS9/CD83/CBFB/FBN1/PPP2R3C/ZEB1/CD74/CD27/SFRP1/TJP2/PF4/INPP5D/LILRB4/BCL6/TESC/CASP8/SMAD7/TLR4/FADD/ANXA1/HLA-G/IL7R/IL18/TGFBR2/CD2/CYLD/TLR3/TAL1
GO:0006959	GO:0006959	humoral immune response	204	0.555649987	2.03070473	0.001410437	0.030113569	0.025636496	1001	tags=25%, list=9%, signal=24%	C1QA/C1QB/C3AR1/FCN1/LYZ/RNASE6/VSIG4/HLA-DQB1/IGHM/LY86/CFD/A2M/GATA3/LTF/IGHA1/PTPN6/TREM2/C5AR1/CFP/CFH/HIST2H2BE/EBI3/IGKV3-20/IGLV2-14/CFB/S100A8/HLA-E/TRBC1/MEF2C/IGHV3-23/IGLV1-40/FCN3/GNLY/C3/DEFA4/CD83/TREM1/SPON2/SERPING1/RPS19/IGKC/PPP2R3C/CCR2/CCL2/TNFRSF21/PROS1/C2/PF4/IGKV4-1/C1QBP/POU2AF1/ST6GAL1
GO:0050851	GO:0050851	antigen receptor-mediated signaling pathway	204	0.592275596	2.164558413	0.001410437	0.030113569	0.025636496	1304	tags=33%, list=12%, signal=29%	PTPRC/LYN/HLA-DQB1/CD300A/IGHM/GBP1/BTN3A3/HLA-DPA1/HLA-DQA1/PSMB9/LCP2/BTN3A2/HLA-DPB1/MNDA/GATA3/ADA/LAT2/NCKAP1L/IGHA1/PTPN6/LPXN/HLA-DRA/CD3D/PSME2/HLA-DRB1/SYK/PRKCB/PRKCH/CD38/TRBC1/MEF2C/IGHV3-23/BTK/CD247/RFTN1/PSMB8/PSMC2/PRKD2/PSMA7/CBFB/LCK/CD79B/PSME1/CSK/IGKC/PLEKHA1/BTN3A1/TNFRSF21/PSMA3/PSMD7/NCK1/INPP5D/PSMD14/LILRB4/PSMA5/THY1/LAT/SPG21/PSMA6/BAX/PVRIG/RBCK1/PSMC6/CYLD/UBE2D1/TRD…
GO:1903039	GO:1903039	positive regulation of leukocyte cell-cell adhesion	185	0.575954192	2.089933358	0.001412429	0.030113569	0.025636496	1346	tags=34%, list=12%, signal=30%	PTPRC/LYN/PYCARD/HLA-DQB1/CORO1A/HLA-DPA1/HLA-DQA1/HLX/CD44/HLA-DPB1/CCL5/GATA3/ADA/NCKAP1L/HLA-DMB/PTPN6/LILRB2/HLA-DRA/CD3D/HLA-DRB1/CD86/SYK/SASH3/EBI3/ITPKB/HLA-E/VAV1/TRBC1/CCL19/CD247/LGALS9/CD83/LCK/CSK/CCR2/GRB2/CCL2/CD74/NOD2/CD27/NCK1/VCAM1/LILRB4/CCL21/LGALS1/IL6ST/BCL6/FAM49B/CAV1/THY1/FADD/ANXA1/HLA-G/IL7R/IL18/TNFRSF14/TGFBR2/CYLD/HLA-DQB2/ITGA4/MAP3K8/TNFSF14
GO:0002793	GO:0002793	positive regulation of peptide secretion	212	0.422280136	1.546920372	0.001414427	0.030113569	0.025636496	782	tags=14%, list=7%, signal=13%	FCN1/CD14/IFIH1/PYCARD/TLR2/CASP1/POSTN/DDX58/TLR1/CSF1R/HTR2B/GATA3/FGR/HYAL2/SYK/CD34/S100A8/CD38/HLA-E/TWIST1/CCL19/CD58/LGALS9/SOX4/CLEC5A/CARD8/VEGFC/NOD2/CRTAM/TNFRSF4
GO:0022409	GO:0022409	positive regulation of cell-cell adhesion	210	0.510630329	1.869641384	0.001414427	0.030113569	0.025636496	1346	tags=30%, list=12%, signal=27%	PTPRC/LYN/PYCARD/HLA-DQB1/CORO1A/HLA-DPA1/HLA-DQA1/HLX/CD44/HLA-DPB1/CCL5/GATA3/ADA/NCKAP1L/HLA-DMB/PTPN6/LILRB2/HLA-DRA/CD3D/HLA-DRB1/CD86/SYK/SASH3/EBI3/ITPKB/HLA-E/VAV1/TRBC1/CCL19/CD247/LGALS9/CD83/LCK/CSK/CCR2/GRB2/CCL2/CD74/NOD2/CD27/NCK1/VCAM1/LILRB4/CCL21/LGALS1/IL6ST/BCL6/FAM49B/CAV1/THY1/MYO10/SMAD7/FADD/ANXA1/HLA-G/IL7R/IL18/TNFRSF14/TGFBR2/CYLD/HLA-DQB2/ITGA4/MAP3K8/TNFSF14
GO:0032943	GO:0032943	mononuclear cell proliferation	214	0.501685703	1.838900621	0.001414427	0.030113569	0.025636496	1482	tags=29%, list=13%, signal=25%	PTPRC/LYN/PYCARD/DOCK2/CD300A/LST1/CORO1A/HLA-DPA1/RAC2/IDO1/HLA-DPB1/CCL5/MNDA/ADA/NCKAP1L/HLA-DMB/PTPN6/LILRB2/CD86/SYK/SASH3/EBI3/CD38/HLA-E/PELI1/LRRC32/MEF2C/CCL19/BTK/LGALS9/CCR2/BTN3A1/CD74/AHR/TNFRSF21/CD40/TNFRSF4/MSN/NCK1/INPP5D/CASP3/VCAM1/SATB1/IL6ST/BCL6/TLR4/FADD/ANXA1/HLA-G/BAX/IL7R/IL18/GPR183/TGFBR2/TNFSF14/ELF4/CD180/SLC11A1/FKBP1B/IL1B/FCGR2B
GO:0046651	GO:0046651	lymphocyte proliferation	212	0.502726665	1.841616625	0.001414427	0.030113569	0.025636496	1482	tags=29%, list=13%, signal=25%	PTPRC/LYN/PYCARD/DOCK2/CD300A/LST1/CORO1A/HLA-DPA1/RAC2/IDO1/HLA-DPB1/CCL5/MNDA/ADA/NCKAP1L/HLA-DMB/PTPN6/LILRB2/CD86/SYK/SASH3/EBI3/CD38/HLA-E/PELI1/LRRC32/MEF2C/CCL19/BTK/LGALS9/CCR2/BTN3A1/CD74/AHR/TNFRSF21/CD40/TNFRSF4/MSN/NCK1/INPP5D/CASP3/VCAM1/SATB1/IL6ST/BCL6/TLR4/FADD/ANXA1/HLA-G/BAX/IL7R/IL18/GPR183/TGFBR2/TNFSF14/ELF4/CD180/SLC11A1/FKBP1B/IL1B/FCGR2B
GO:0060326	GO:0060326	cell chemotaxis	218	0.482209991	1.771462603	0.001414427	0.030113569	0.025636496	1165	tags=26%, list=11%, signal=23%	ITGB2/C3AR1/CX3CR1/FCER1G/LYN/CCR1/CCL4/CORO1A/PLA2G7/FPR3/CXCR4/PDGFD/RAC2/AGTR1/CCL5/NCKAP1L/PDGFRA/C5AR1/SYK/CKLF/CCL8/NRP1/S1PR1/CCR5/S100A8/VAV1/FPR1/CXCL12/KDR/CXCL10/CCL19/RHOG/GPR18/LGALS9/EDNRB/PRKD2/RPS19/VEGFC/CCR2/CCL2/CD74/DOCK4/SWAP70/PF4/ADAM10/VCAM1/CCL21/IL16/CCL18/C1QBP/MTUS1/ANXA1/MPP1/GPR183/ARRB2/BIN2
GO:0002449	GO:0002449	lymphocyte mediated immunity	200	0.586131466	2.139716089	0.001416431	0.030113569	0.025636496	1502	tags=32%, list=14%, signal=28%	C1QA/RSAD2/C1QB/FCER1G/PTPRC/HLA-DQB1/IRF7/IGHM/CORO1A/BTN3A3/BTN3A2/GATA3/MICB/IGHA1/PTPN6/IL13RA2/GZMB/SASH3/IGKV3-20/IGLV2-14/CEBPG/HLA-E/VAV1/TRBC1/IGHV3-23/BTK/IGLV1-40/RFTN1/C3/LGALS9/GYPC/SERPING1/IGKC/CD74/CD27/CD40/CRTAM/CD8A/SWAP70/C2/INPP5D/EMP2/IGKV4-1/BCL6/C1QBP/FAM49B/SMAD7/JAG1/FADD/IL7R/IL18/ARRB2/SLAMF7/IGHV1-69/IGHV3-9/TRDC/BATF/SLC11A1/B2M/TBX21/IL1B/NBN/FCGR2B/IGLV3-19
GO:0051607	GO:0051607	defense response to virus	172	0.754229135	2.73194703	0.00141844	0.030113569	0.025636496	695	tags=30%, list=6%, signal=29%	IFI44L/MX1/RSAD2/ISG15/MX2/ISG20/OAS3/OAS2/HERC5/OAS1/PTPRC/APOBEC3A/RNASE6/IFIH1/PYCARD/IFIT1/IFIT3/IRF7/IFITM1/GBP1/DDX58/IFI16/PLSCR1/RTP4/IFIT2/TRIM22/EIF2AK2/OASL/SAMHD1/MICB/APOBEC3G/DDX60/IFITM3/HYAL2/STAT1/IFIT5/APOBEC3B/ADAR/DHX58/TRIM5/PRF1/C19orf66/CNOT7/CXCL10/FCN3/RNF125/IRF9/DDX41/RNASE2/SPON2/TLR7/BIRC3
GO:0070663	GO:0070663	regulation of leukocyte proliferation	172	0.548538201	1.986899258	0.00141844	0.030113569	0.025636496	1136	tags=28%, list=10%, signal=25%	PTPRC/LYN/PYCARD/CD300A/LST1/CORO1A/HLA-DPA1/RAC2/IDO1/HLA-DPB1/CCL5/MNDA/ADA/NCKAP1L/HLA-DMB/PTPN6/LILRB2/CD86/SYK/SASH3/EBI3/CCL8/CD38/HLA-E/PELI1/LRRC32/MEF2C/CCL19/BTK/LGALS9/CCR2/CD74/AHR/TNFRSF21/CD40/TNFRSF4/NCK1/INPP5D/CASP3/VCAM1/IL6ST/BCL6/TLR4/FADD/ANXA1/HLA-G/IL18/GPR183
GO:2000116	GO:2000116	regulation of cysteine-type endopeptidase activity	199	0.429981619	1.569667554	0.00141844	0.030113569	0.025636496	1542	tags=27%, list=14%, signal=24%	IFI6/IFI27/PYCARD/CASP1/IFI16/TNFRSF1B/PSMB9/PPARG/CD44/TNFAIP8/LTF/BID/TNFSF10/CASP4/S100A8/CST7/CASP7/RPS6KA3/TRIAP1/LGALS9/PLAUR/LCK/ARL6IP1/CARD8/CFLAR/BIRC3/ARL6IP5/MICAL1/CD27/BAK1/FAS/CASP3/AIM2/RPS27L/CASP8/GPX1/FADD/BAX/ANP32B/ARRB2/VCP/PTGS2/MAP3K5/TNFSF14/TNFRSF10B/HSPE1/PDCD5/PPM1F/HTRA2/IGBP1/CYCS/CST6/PMAIP1/MMP9
GO:0019882	GO:0019882	antigen processing and presentation	193	0.566710739	2.062377833	0.001424501	0.030113569	0.025636496	1785	tags=37%, list=16%, signal=32%	IFI30/FCER1G/CD36/PYCARD/CTSS/HLA-DQB1/NCF2/CYBB/HLA-DPA1/HLA-DQA1/PSMB9/HLA-DPB1/HLA-DMB/CAPZA1/LILRB2/NCF4/HLA-DRA/TREM2/PSME2/HLA-DRB1/HLA-DMA/TAP1/HLA-E/CCL19/AP1S2/RFTN1/LGMN/PSMB8/PSMC2/PSMA7/HLA-F/HLA-B/PSME1/SEC24D/CD74/HLA-A/NOD2/MR1/PSMA3/PSMD7/CD8A/PSMD14/CCL21/DYNC1LI2/PSMA5/PSMA6/HLA-G/RAB8B/TAP2/RACGAP1/PSMC6/ERAP1/RAB32/HLA-DQB2/IKBKB/SLC11A1/B2M/HLA-C/PSMB4/PSMC4/FCGR2B/PSMA4/KIF2…
GO:0030100	GO:0030100	regulation of endocytosis	187	0.438620457	1.587770298	0.001424501	0.030113569	0.025636496	940	tags=17%, list=9%, signal=15%	HCK/FCER1G/CD36/CD14/PYCARD/DOCK2/TLR2/CD300A/PTX3/PPARG/FGR/APOC1/NCKAP1L/MERTK/SYK/SYT11/RAP1A/CCL19/ARAP3/C3/ANGPT1/CDH13/MFGE8/PTEN/CSK/SDCBP/CCL2/C2/ATG3/CCL21/CAV1
GO:0030217	GO:0030217	T cell differentiation	187	0.456502445	1.652501637	0.001424501	0.030113569	0.025636496	1298	tags=23%, list=12%, signal=21%	RSAD2/FCER1G/PTPRC/DOCK2/HLX/GATA3/ADA/NCKAP1L/LILRB2/CD3D/CD86/SYK/SASH3/ITPKB/VAV1/CCL19/JAG2/GPR18/LGALS9/SOX4/CD83/CBFB/LCK/ZEB1/CD74/CD27/CD8A/SATB1/LILRB4/BCL6/SMAD7/IL18R1/FADD/ANXA1/HLA-G/IL7R/IL18/GPR183/TGFBR2/CD2/RHOH/CYLD/BATF
GO:0043122	GO:0043122	regulation of I-kappaB kinase/NF-kappaB signaling	173	0.505209149	1.829377739	0.001424501	0.030113569	0.025636496	1660	tags=30%, list=15%, signal=26%	CD36/PYCARD/CASP1/HTR2B/TRIM22/UBD/LTF/MYD88/HMOX1/STAT1/IFIT5/APOL3/PRKCB/PLK2/TNFSF10/TRIM5/TRIM38/PELI1/CCL19/ANGPT1/SECTM1/LGALS9/CARD8/CFLAR/BIRC3/CD74/NOD2/CD40/SLC20A1/GPRC5B/S100A4/CCL21/LGALS1/TNIP2/CASP8/ECM1/FADD/GOLT1B/RBCK1/RHOH/UBE2I/IKBKB/TNFRSF10B/ECT2/IL1B/TGM2/TICAM1/IRAK1/TANK/NLRP1/REL/ZFAND6
GO:0007249	GO:0007249	I-kappaB kinase/NF-kappaB signaling	195	0.534987706	1.950237011	0.001426534	0.030113569	0.025636496	1660	tags=31%, list=15%, signal=27%	CD36/CD14/LY96/PYCARD/TLR2/CASP1/HTR2B/TRIM22/UBD/LTF/MYD88/HMOX1/STAT1/IFIT5/APOL3/PRKCB/PLK2/TNFSF10/TRIM5/TRIM38/PELI1/CCL19/BTK/ANGPT1/SECTM1/LGALS9/CARD8/CFLAR/TLR7/BIRC3/CD74/NOD2/CD40/SLC20A1/GPRC5B/S100A4/CCL21/LGALS1/TNIP2/CASP8/TLR4/ECM1/FADD/GOLT1B/RBCK1/RHOH/UBE2I/TLR3/IKBKB/TNFRSF10B/ECT2/IL1B/TGM2/TICAM1/PRDX4/IRAK1/TANK/NLRP1/REL/ZFAND6
GO:0048872	GO:0048872	homeostasis of number of cells	195	0.427805275	1.559515613	0.001426534	0.030113569	0.025636496	1593	tags=26%, list=15%, signal=22%	FCER1G/LYN/HCLS1/CORO1A/RASSF2/GATA3/ADA/DOCK10/LIPA/NCKAP1L/MERTK/HMOX1/STAT1/KRAS/ADAR/SASH3/ITPKB/CEBPG/MEF2C/EZH2/LGALS9/RPS19/PPP2R3C/CCR2/HOXB6/CD74/BAK1/INPP5D/CASP3/BCL6/LAT/FADD/ANXA1/BAX/IL7R/GPR183/TMOD3/CYLD/TAL1/TNFSF14/CCNB2/TNFRSF17/B2M/MED1/FLT3LG/POLB/SMAP1/PMAIP1/SART3/HMGB2
GO:0050714	GO:0050714	positive regulation of protein secretion	195	0.428085281	1.560536343	0.001426534	0.030113569	0.025636496	782	tags=15%, list=7%, signal=14%	FCN1/CD14/IFIH1/PYCARD/TLR2/CASP1/POSTN/DDX58/TLR1/CSF1R/HTR2B/GATA3/FGR/HYAL2/SYK/CD34/CD38/HLA-E/TWIST1/CCL19/CD58/LGALS9/SOX4/CLEC5A/CARD8/VEGFC/NOD2/CRTAM/TNFRSF4
GO:0050730	GO:0050730	regulation of peptidyl-tyrosine phosphorylation	195	0.416357749	1.517784955	0.001426534	0.030113569	0.025636496	1140	tags=17%, list=10%, signal=15%	ITGB2/CD36/LYN/HCLS1/CD300A/CSF1R/SAMSN1/PDGFD/CD44/CCL5/PTPN6/HYAL2/TREM2/SYK/NRP1/CNOT7/ANGPT1/RAP2C/RAP2B/VEGFC/CD74/SFRP1/CD40/HDAC2/GPRC5B/IL6ST/CAV1/THY1/FGFR3/APP/EPHA4/IL18/ARRB2
GO:0043281	GO:0043281	regulation of cysteine-type endopeptidase activity involved in apoptotic process	174	0.416410437	1.505566372	0.001430615	0.030113569	0.025636496	1718	tags=30%, list=16%, signal=26%	IFI6/IFI27/PYCARD/CASP1/TNFRSF1B/PPARG/CD44/TNFAIP8/BID/TNFSF10/CASP4/S100A8/CASP7/RPS6KA3/TRIAP1/LGALS9/PLAUR/LCK/ARL6IP1/CARD8/CFLAR/BIRC3/ARL6IP5/MICAL1/CD27/BAK1/FAS/CASP3/RPS27L/CASP8/GPX1/FADD/BAX/ANP32B/ARRB2/VCP/PTGS2/MAP3K5/TNFSF14/TNFRSF10B/HSPE1/PDCD5/PPM1F/HTRA2/IGBP1/CYCS/PMAIP1/MMP9/PDCD2/NLRP1/S100A9/RPS6KA1
GO:0043903	GO:0043903	regulation of symbiosis, encompassing mutualism through parasitism	183	0.628361007	2.273031289	0.001430615	0.030113569	0.025636496	988	tags=25%, list=9%, signal=23%	MX1/RSAD2/ISG15/ISG20/OAS3/OAS2/FCN1/OAS1/CD36/APOBEC3A/IFIT1/IFITM1/CCL4/IFI16/PLSCR1/PTX3/IRF8/CCL5/EIF2AK2/OASL/LTF/APOBEC3G/TRIM21/IFITM3/STAT1/IFIT5/ADAR/TRIM5/TRIM38/C19orf66/CNOT7/TAF11/FCN3/TRIM14/POLR2D/LGALS9/STOM/PKN2/CD74/LGALS1/TOP2A/VPS4B/POLR2F/CAV1/CAV2/ZC3HAV1
GO:0071216	GO:0071216	cellular response to biotic stimulus	171	0.55100228	1.991511535	0.001430615	0.030113569	0.025636496	1904	tags=35%, list=17%, signal=29%	HCK/CX3CR1/CD36/CD14/LYN/LY96/PYCARD/TLR2/CASP1/LY86/TLR1/TNFRSF1B/IRF8/CCL5/LTF/LILRB2/TREM2/CD86/SYK/TRIM5/CCR5/ABCA1/MEF2C/CXCL10/BTK/DEFA4/EDNRB/SPON2/SCARB2/CARD8/CCL2/NOD2/CD40/CDC73/LILRA2/TNIP2/TLR4/PLSCR3/IL18/HDAC5/CDK4/CCL20/PDCD4/CD180/IL1B/FCGR2B/CTR9/NOS3/TICAM1/IRAK1/HMGB2/PABPN1/TSPO/MTDH/CCDC47/PLAA/RHOA/IL12A/GSK3B/KLRK1
GO:0070374	GO:0070374	positive regulation of ERK1 and ERK2 cascade	192	0.415303291	1.508167977	0.001432665	0.030113569	0.025636496	1190	tags=20%, list=11%, signal=18%	CD36/PYCARD/CCR1/CCL4/TIE1/CSF1R/HTR2B/PDGFD/CD44/CCL5/MERTK/TREM2/PDGFRA/C5AR1/CCL8/NRP1/MARCO/RAP1A/KDR/CCL19/ANGPT1/LGALS9/PRKD2/PTEN/CFLAR/CCL2/CD74/NOD2/MAP2K1/CCL21/CCL18/FGFR3/APP/TLR4/EPHA4/GPR183/ARRB2/FLT4
GO:0001818	GO:0001818	negative regulation of cytokine production	196	0.492966682	1.795900788	0.001436782	0.030113569	0.025636496	1181	tags=21%, list=11%, signal=19%	ISG15/HERC5/IFIH1/PYCARD/NMI/GBP1/DDX58/FN1/IDO1/SRGN/GATA3/LTF/NCKAP1L/MERTK/HMOX1/UBE2L6/DHX58/SYT11/CD34/LRRC32/TWIST1/BTK/GPR18/ANGPT1/RNF125/LGALS9/CD83/CARD8/ANXA4/CSK/TNFRSF21/INPP5D/TIA1/BCL6/C1QBP/SMAD7/TLR4/YY1/ANXA1/ARRB2/ACP5/UBA7
GO:0042113	GO:0042113	B cell activation	196	0.550967918	2.007202018	0.001436782	0.030113569	0.025636496	1553	tags=33%, list=14%, signal=29%	PTPRC/LYN/CD300A/IGHM/SAMSN1/MNDA/ADA/DOCK10/LAT2/NCKAP1L/IGHA1/PTPN6/MFNG/SYK/PRKCB/SASH3/CEBPG/CD38/PELI1/TRBC1/MEF2C/IGHV3-23/BTK/HDAC9/ITM2A/CD79B/IGKC/PPP2R3C/CD74/AHR/NOD2/CD27/BAK1/TNFRSF21/SFRP1/CD40/TNFRSF4/SWAP70/INPP5D/CASP3/VCAM1/LGALS1/TNIP2/BCL6/LYL1/CASP8/TLR4/BAX/IL7R/GPR183/HDAC5/CYLD/TRDC/BLNK/BATF/ITGA4/CD180/HHEX/TBX21/NBN/IGBP1/FCGR2B/RBPJ/TICAM1
GO:0050870	GO:0050870	positive regulation of T cell activation	176	0.582629683	2.103160314	0.001438849	0.030113569	0.025636496	1346	tags=34%, list=12%, signal=30%	PTPRC/LYN/PYCARD/HLA-DQB1/CORO1A/HLA-DPA1/HLA-DQA1/HLX/HLA-DPB1/CCL5/GATA3/ADA/NCKAP1L/HLA-DMB/PTPN6/LILRB2/HLA-DRA/CD3D/HLA-DRB1/CD86/SYK/SASH3/EBI3/ITPKB/HLA-E/VAV1/TRBC1/CCL19/CD247/LGALS9/CD83/LCK/CSK/CCR2/GRB2/CCL2/CD74/NOD2/CD27/NCK1/VCAM1/LILRB4/CCL21/LGALS1/IL6ST/BCL6/FAM49B/CAV1/THY1/FADD/ANXA1/HLA-G/IL7R/IL18/TNFRSF14/TGFBR2/CYLD/HLA-DQB2/MAP3K8/TNFSF14
GO:0038093	GO:0038093	Fc receptor signaling pathway	177	0.50520926	1.822091161	0.001440922	0.030113569	0.025636496	2464	tags=45%, list=22%, signal=35%	HCK/FCER1G/LYN/PSMB9/LCP2/ARPC1B/FGR/LAT2/NCKAP1L/PSME2/KRAS/SYK/IGKV3-20/IGLV2-14/NRAS/ARPC2/VAV1/RAP1A/IGHV3-23/BTK/CD247/IGLV1-40/PSMB8/PSMC2/WIPF1/PSMA7/PSME1/IGKC/GRB2/PSMA3/PSMD7/NCK1/ACTR3/PSMD14/IGKV4-1/PSMA5/LAT/MYO10/PSMA6/CYFIP1/FCGRT/PSMC6/IGHV1-69/UBE2D1/IGHV3-9/PPP3CA/IKBKB/PSMB4/PSMC4/FCGR2B/IGLV3-19/PSMA4/PSMB2/PSME4/HSP90AA1/PSMD11/PSMB10/UBE2D2/ARPC5/CALM1/LIMK1/BCL10/ACTR2/PLCG…
GO:0050852	GO:0050852	T cell receptor signaling pathway	167	0.533281714	1.916124932	0.001455604	0.030113569	0.025636496	1509	tags=31%, list=14%, signal=27%	PTPRC/HLA-DQB1/CD300A/GBP1/BTN3A3/HLA-DPA1/HLA-DQA1/PSMB9/LCP2/BTN3A2/HLA-DPB1/GATA3/ADA/PTPN6/HLA-DRA/CD3D/PSME2/HLA-DRB1/TRBC1/BTK/CD247/RFTN1/PSMB8/PSMC2/PRKD2/PSMA7/LCK/PSME1/CSK/BTN3A1/TNFRSF21/PSMA3/PSMD7/NCK1/INPP5D/PSMD14/LILRB4/PSMA5/THY1/LAT/PSMA6/PVRIG/RBCK1/PSMC6/CYLD/UBE2D1/HLA-DQB2/IKBKB/PSMB4/PSMC4/EIF2B1/PSMA4
GO:0050920	GO:0050920	regulation of chemotaxis	167	0.425160903	1.527637991	0.001455604	0.030113569	0.025636496	1136	tags=23%, list=10%, signal=21%	C3AR1/LYN/CCR1/CCL4/PLA2G7/CXCR4/PDGFD/RAC2/CCL5/NCKAP1L/PDGFRA/C5AR1/NRP1/S1PR1/CXCL12/KDR/CXCL10/CCL19/GPR18/CDH13/LGALS9/PRKD2/VEGFC/SEMA4C/CCR2/CCL2/CD74/SWAP70/PF4/ADAM10/PLXNA2/CCL21/IL16/ANGPT2/C1QBP/MTUS1/SEMA3F/MPP1/GPR183
GO:0030595	GO:0030595	leukocyte chemotaxis	166	0.49276319	1.768532153	0.001461988	0.030113569	0.025636496	1136	tags=26%, list=10%, signal=24%	ITGB2/C3AR1/CX3CR1/FCER1G/LYN/CCR1/CCL4/CORO1A/PLA2G7/CXCR4/RAC2/CCL5/NCKAP1L/C5AR1/SYK/CKLF/CCL8/S1PR1/CCR5/S100A8/VAV1/CXCL12/CXCL10/CCL19/GPR18/LGALS9/EDNRB/RPS19/VEGFC/CCR2/CCL2/CD74/SWAP70/PF4/ADAM10/CCL21/IL16/CCL18/C1QBP/MTUS1/ANXA1/MPP1/GPR183
GO:0032944	GO:0032944	regulation of mononuclear cell proliferation	165	0.552736432	1.978647122	0.001470588	0.030113569	0.025636496	1136	tags=28%, list=10%, signal=26%	PTPRC/LYN/PYCARD/CD300A/LST1/CORO1A/HLA-DPA1/RAC2/IDO1/HLA-DPB1/CCL5/MNDA/ADA/NCKAP1L/HLA-DMB/PTPN6/LILRB2/CD86/SYK/SASH3/EBI3/CD38/HLA-E/PELI1/LRRC32/MEF2C/CCL19/BTK/LGALS9/CCR2/CD74/AHR/TNFRSF21/CD40/TNFRSF4/NCK1/INPP5D/CASP3/VCAM1/IL6ST/BCL6/TLR4/FADD/ANXA1/HLA-G/IL18/GPR183
GO:0042742	GO:0042742	defense response to bacterium	165	0.547899519	1.961332279	0.001470588	0.030113569	0.025636496	779	tags=21%, list=7%, signal=19%	ISG15/FCER1G/LYZ/CD36/RNASE6/PYCARD/TLR2/PLAC8/IGHM/TLR1/IRF8/ADAMTS5/FGR/LTF/IGHA1/MYD88/C5AR1/CFP/SYK/HIST2H2BE/IGKV3-20/SYT11/S100A8/HLA-E/TRBC1/IGHV3-23/GNLY/DEFA4/STAB1/SPON2/RPS19/IGKC/NOD2/MR1
GO:0050670	GO:0050670	regulation of lymphocyte proliferation	164	0.55375018	1.981226956	0.001470588	0.030113569	0.025636496	1136	tags=29%, list=10%, signal=26%	PTPRC/LYN/PYCARD/CD300A/LST1/CORO1A/HLA-DPA1/RAC2/IDO1/HLA-DPB1/CCL5/MNDA/ADA/NCKAP1L/HLA-DMB/PTPN6/LILRB2/CD86/SYK/SASH3/EBI3/CD38/HLA-E/PELI1/LRRC32/MEF2C/CCL19/BTK/LGALS9/CCR2/CD74/AHR/TNFRSF21/CD40/TNFRSF4/NCK1/INPP5D/CASP3/VCAM1/IL6ST/BCL6/TLR4/FADD/ANXA1/HLA-G/IL18/GPR183
GO:0002573	GO:0002573	myeloid leukocyte differentiation	162	0.486567601	1.736052847	0.001481481	0.030113569	0.025636496	1542	tags=26%, list=14%, signal=23%	TYROBP/LYN/HCLS1/EVI2B/TLR2/CCR1/IRF7/IFI16/CSF1R/RASSF2/PPARG/UBD/GATA3/CEBPA/LTF/NME1/MEF2C/CCL19/FBN1/CD74/SFRP1/TSPAN2/TJP2/PF4/INPP5D/LILRB4/APP/TESC/CASP8/OSTM1/TLR4/FADD/GPR183/TGFBR2/BATF3/BATF/TLR3/TAL1/HHEX/MED1/RBPJ/MMP9
GO:0048002	GO:0048002	antigen processing and presentation of peptide antigen	162	0.589948889	2.104912958	0.001481481	0.030113569	0.025636496	1785	tags=38%, list=16%, signal=33%	IFI30/FCER1G/CD36/PYCARD/CTSS/HLA-DQB1/NCF2/CYBB/HLA-DPA1/HLA-DQA1/PSMB9/HLA-DPB1/HLA-DMB/CAPZA1/NCF4/HLA-DRA/TREM2/PSME2/HLA-DRB1/HLA-DMA/TAP1/HLA-E/AP1S2/LGMN/PSMB8/PSMC2/PSMA7/HLA-F/HLA-B/PSME1/SEC24D/CD74/HLA-A/MR1/PSMA3/PSMD7/PSMD14/DYNC1LI2/PSMA5/PSMA6/HLA-G/TAP2/RACGAP1/PSMC6/ERAP1/HLA-DQB2/IKBKB/SLC11A1/B2M/HLA-C/PSMB4/PSMC4/FCGR2B/PSMA4/KIF2A/PSMB2/PSME4/PSMD11/OSBPL1A/KIF4A/PSMB10/SAR1B
GO:0019884	GO:0019884	antigen processing and presentation of exogenous antigen	157	0.578607744	2.059403485	0.001492537	0.030113569	0.025636496	1785	tags=37%, list=16%, signal=31%	IFI30/FCER1G/CD36/CTSS/HLA-DQB1/NCF2/CYBB/HLA-DPA1/HLA-DQA1/PSMB9/HLA-DPB1/HLA-DMB/CAPZA1/NCF4/HLA-DRA/PSME2/HLA-DRB1/HLA-DMA/TAP1/HLA-E/AP1S2/LGMN/PSMB8/PSMC2/PSMA7/HLA-F/HLA-B/PSME1/SEC24D/CD74/HLA-A/PSMA3/PSMD7/PSMD14/DYNC1LI2/PSMA5/PSMA6/HLA-G/TAP2/RACGAP1/PSMC6/HLA-DQB2/IKBKB/B2M/HLA-C/PSMB4/PSMC4/FCGR2B/PSMA4/KIF2A/PSMB2/CD1D/PSME4/PSMD11/OSBPL1A/KIF4A/PSMB10/SAR1B
GO:0050792	GO:0050792	regulation of viral process	160	0.642284547	2.285193845	0.001497006	0.030113569	0.025636496	988	tags=27%, list=9%, signal=25%	MX1/RSAD2/ISG15/ISG20/OAS3/OAS2/FCN1/OAS1/APOBEC3A/IFIT1/IFITM1/CCL4/IFI16/PLSCR1/PTX3/CCL5/EIF2AK2/OASL/LTF/APOBEC3G/TRIM21/IFITM3/STAT1/IFIT5/ADAR/TRIM5/TRIM38/C19orf66/CNOT7/TAF11/FCN3/TRIM14/POLR2D/LGALS9/STOM/PKN2/CD74/LGALS1/TOP2A/VPS4B/POLR2F/CAV2/ZC3HAV1
GO:0071219	GO:0071219	cellular response to molecule of bacterial origin	156	0.576463315	2.04529947	0.001506024	0.030113569	0.025636496	1593	tags=31%, list=15%, signal=27%	HCK/CX3CR1/CD36/CD14/LYN/LY96/PYCARD/TLR2/CASP1/LY86/TLR1/TNFRSF1B/IRF8/CCL5/LTF/LILRB2/TREM2/CD86/TRIM5/CCR5/ABCA1/MEF2C/CXCL10/DEFA4/EDNRB/SPON2/SCARB2/CARD8/CCL2/NOD2/CD40/CDC73/LILRA2/TNIP2/TLR4/PLSCR3/IL18/HDAC5/CDK4/CCL20/PDCD4/CD180/IL1B/FCGR2B/CTR9/NOS3/TICAM1/IRAK1/HMGB2
GO:0034341	GO:0034341	response to interferon-gamma	155	0.670576004	2.380545571	0.001510574	0.030113569	0.025636496	1535	tags=44%, list=14%, signal=38%	OAS3/OAS2/HCK/IFI30/OAS1/HLA-DQB1/GBP2/IRF7/IFITM1/CASP1/CCL4/NMI/GBP1/HLA-DPA1/TRIM22/HLA-DQA1/PPARG/IRF8/CD44/HLA-DPB1/CCL5/UBD/OASL/TRIM21/IFITM3/STAT1/HLA-DRA/GCH1/HLA-DRB1/CCL8/TRIM5/TRIM38/HLA-E/C19orf66/CCL19/CD58/SP100/LGALS9/IRF9/HLA-F/KYNU/HLA-B/CCL2/HLA-A/CD40/CDC37/ACTR3/VCAM1/SYNCRIP/CCL21/CCL18/MID1/HLA-G/IFNGR1/IFNGR2/SUMO1/HLA-DQB2/TLR3/CCL20/RAB20/SLC11A1/B2M/HLA-C/MED1/CX3CL1/FL…
GO:0061025	GO:0061025	membrane fusion	155	0.432282936	1.53460491	0.001510574	0.030113569	0.025636496	1781	tags=25%, list=16%, signal=21%	MX1/MX2/BCL2A1/TIE1/CORO1A/CXCR4/HYAL2/DYSF/TAP1/SAMD9/SYT11/CCR5/GCA/FOLR2/PID1/TBC1D8/LRMP/BAK1/STX18/CAV2/DNM3/ANXA1/TRIM9/BAX/RAB8B/TAP2/SNAP29/TBC1D12/RAB20/RABGAP1L/STX4/DNM1L/TBC1D2B/TBC1D2/STX8/SPG11/NAPG/TBC1D9
GO:0002440	GO:0002440	production of molecular mediator of immune response	152	0.509734479	1.800545587	0.001533742	0.030113569	0.025636496	1528	tags=27%, list=14%, signal=24%	RSAD2/FCER1G/CD36/PTPRC/HLA-DQB1/TLR2/GATA3/HMOX1/IL13RA2/SASH3/HLA-E/BTK/ANGPT1/ITM2A/SPON2/IGKC/CD74/NOD2/CD40/MR1/TNFRSF4/SWAP70/GPRC5B/IGKV4-1/BCL6/SMAD7/TLR4/IGLV3-10/IL7R/IL18/BATF/TLR3/SLC11A1/B2M/TBX21/CD244/NBN/FCGR2B/HK1/POLB/STX4
GO:0002478	GO:0002478	antigen processing and presentation of exogenous peptide antigen	150	0.584308546	2.058548641	0.001533742	0.030113569	0.025636496	1785	tags=38%, list=16%, signal=32%	IFI30/FCER1G/CD36/CTSS/HLA-DQB1/NCF2/CYBB/HLA-DPA1/HLA-DQA1/PSMB9/HLA-DPB1/HLA-DMB/CAPZA1/NCF4/HLA-DRA/PSME2/HLA-DRB1/HLA-DMA/TAP1/HLA-E/AP1S2/LGMN/PSMB8/PSMC2/PSMA7/HLA-F/HLA-B/PSME1/SEC24D/CD74/HLA-A/PSMA3/PSMD7/PSMD14/DYNC1LI2/PSMA5/PSMA6/HLA-G/TAP2/RACGAP1/PSMC6/HLA-DQB2/IKBKB/B2M/HLA-C/PSMB4/PSMC4/FCGR2B/PSMA4/KIF2A/PSMB2/PSME4/PSMD11/OSBPL1A/KIF4A/PSMB10/SAR1B
GO:0002699	GO:0002699	positive regulation of immune effector process	152	0.570424025	2.014920519	0.001533742	0.030113569	0.025636496	1059	tags=28%, list=10%, signal=25%	RSAD2/ITGB2/FCER1G/CD36/LYN/CD300A/RAC2/HLX/ITGAM/GATA3/FGR/DDX60/HLA-DMB/HMOX1/IL13RA2/CD86/SYK/SASH3/DHX58/HLA-E/VAV1/RAP1A/CCL19/BTK/C3/LGALS9/SPON2/GYPC/RPS19/CCR2/CD74/NOD2/CD40/CRTAM/TNFRSF4/GPRC5B/FES/FAM49B/C12orf4/TLR4/FADD/ANXA1
GO:0010952	GO:0010952	positive regulation of peptidase activity	149	0.469890362	1.65623481	0.001538462	0.030113569	0.025636496	1643	tags=32%, list=15%, signal=27%	IFI27/LYN/PYCARD/CASP1/IFI16/FN1/PPARG/BID/PSME2/TNFSF10/CASP4/S100A8/CASP7/PCOLCE/LGALS9/LCK/CARD8/CFLAR/PSME1/ARL6IP5/BAK1/FAS/PSMD14/CASP3/AIM2/CAV1/RPS27L/APP/CASP8/FADD/BAX/EPHA4/ANP32B/VCP/MAP3K5/CLPX/TNFRSF10B/HSPE1/PDCD5/PPM1F/HTRA2/CYCS/PMAIP1/TANK/PSME4/PDCD2/NLRP1
GO:0071222	GO:0071222	cellular response to lipopolysaccharide	149	0.565294267	1.992507442	0.001538462	0.030113569	0.025636496	1593	tags=30%, list=15%, signal=26%	HCK/CX3CR1/CD36/CD14/LYN/LY96/PYCARD/TLR2/CASP1/LY86/TNFRSF1B/IRF8/CCL5/LTF/LILRB2/CD86/TRIM5/CCR5/ABCA1/MEF2C/CXCL10/DEFA4/EDNRB/SPON2/SCARB2/CARD8/CCL2/CD40/CDC73/LILRA2/TNIP2/TLR4/PLSCR3/IL18/HDAC5/CDK4/CCL20/PDCD4/CD180/IL1B/CTR9/NOS3/TICAM1/IRAK1/HMGB2
GO:0002526	GO:0002526	acute inflammatory response	145	0.524207335	1.840041529	0.001547988	0.030113569	0.025636496	933	tags=22%, list=8%, signal=20%	C1QA/C1QB/CD163/C3AR1/FCER1G/PLSCR1/FN1/PPARG/A2M/GATA3/C5AR1/CFP/CFH/IGKV3-20/IGLV2-14/CFB/S100A8/PRCP/IGHV3-23/BTK/IGLV1-40/C3/EDNRB/SERPING1/IGKC/F8/PROS1/C2/VCAM1/IGKV4-1/IL6ST/C1QBP
GO:1903531	GO:1903531	negative regulation of secretion by cell	145	0.456124549	1.601061366	0.001547988	0.030113569	0.025636496	1153	tags=19%, list=10%, signal=17%	RSAD2/CD300A/GBP1/FN1/SRGN/UCP2/HMOX1/IL13RA2/SYT11/CD34/RHBDF2/RAP1A/LRRC32/MAP4K4/ANGPT1/LGALS9/CARD8/ANXA4/CCR2/TNFRSF21/SFRP1/VPS4B/RAB11FIP1/ANXA1/TRIM9/IRS1/ERP29
GO:0002685	GO:0002685	regulation of leukocyte migration	147	0.480475595	1.686978008	0.001550388	0.030113569	0.025636496	1092	tags=26%, list=10%, signal=24%	C3AR1/LYN/PYCARD/CCR1/CD300A/CCL4/PLA2G7/PDGFD/RAC2/CCL5/ADA/NCKAP1L/HMOX1/STK10/C5AR1/CCL8/CXCL12/CXCL10/CCL19/GPR18/LGALS9/VEGFC/CCR2/CCL2/CD74/SWAP70/MSN/PF4/ADAM10/CCL21/C1QBP/THY1/APP/MTUS1/ECM1/FADD/ANXA1/MPP1
GO:0002703	GO:0002703	regulation of leukocyte mediated immunity	143	0.556341141	1.950322887	0.001550388	0.030113569	0.025636496	1140	tags=24%, list=10%, signal=22%	RSAD2/ITGB2/FCER1G/PTPRC/LYN/CD300A/RAC2/ITGAM/GATA3/FGR/HMOX1/PTPN6/IL13RA2/SYK/SASH3/HLA-E/VAV1/BTK/C3/LGALS9/GYPC/CCR2/NOD2/CD40/CRTAM/FES/BCL6/FAM49B/C12orf4/SMAD7/TLR4/FADD/DNASE1L3/IL7R/ARRB2
GO:0042098	GO:0042098	T cell proliferation	143	0.509197116	1.785053659	0.001550388	0.030113569	0.025636496	1454	tags=30%, list=13%, signal=26%	PTPRC/PYCARD/DOCK2/CORO1A/HLA-DPA1/RAC2/IDO1/HLA-DPB1/CCL5/NCKAP1L/HLA-DMB/PTPN6/LILRB2/CD86/SYK/SASH3/EBI3/HLA-E/PELI1/LRRC32/CCL19/LGALS9/CCR2/BTN3A1/TNFRSF21/TNFRSF4/MSN/NCK1/CASP3/VCAM1/SATB1/IL6ST/FADD/ANXA1/HLA-G/BAX/IL18/TGFBR2/TNFSF14/ELF4/SLC11A1/FKBP1B/IL1B
GO:0050663	GO:0050663	cytokine secretion	148	0.60397566	2.123764284	0.001550388	0.030113569	0.025636496	775	tags=26%, list=7%, signal=24%	FCN1/CD36/CD14/LYN/IFIH1/PYCARD/TLR2/CASP1/POSTN/GBP1/DDX58/TLR1/CSF1R/FN1/HTR2B/LCP2/BTN3A2/SRGN/GATA3/FGR/HYAL2/SYK/SYT11/CD34/ABCA1/LRRC32/TWIST1/CCL19/CD58/ANGPT1/LGALS9/CLEC5A/CARD8/ANXA4/BTN3A1/NOD2/TNFRSF21/CRTAM
GO:1903708	GO:1903708	positive regulation of hemopoiesis	143	0.44605845	1.563713235	0.001550388	0.030113569	0.025636496	1682	tags=30%, list=15%, signal=26%	HCLS1/EVI2B/CCR1/HLX/GATA3/ADA/NCKAP1L/STAT1/LILRB2/CD86/SYK/SASH3/ITPKB/CCL19/BTK/LGALS9/CD83/PPP2R3C/CD74/CD27/PF4/INPP5D/LILRB4/FES/BCL6/TESC/CASP8/JAG1/FADD/ANXA1/HLA-G/IL7R/IL18/TGFBR2/CYLD/TAL1/MED1/FLT3LG/SMAP1/HMGB2/PDCD2/PRMT1/ETS1
GO:1904018	GO:1904018	positive regulation of vasculature development	147	0.436669773	1.533173197	0.001550388	0.030113569	0.025636496	1565	tags=29%, list=14%, signal=25%	ITGB2/C3AR1/CX3CR1/CYBB/APLNR/PDGFD/AGTR1/HMOX1/C5AR1/PRKCB/CDH5/PLK2/NRP1/CD34/RAP1A/TWIST1/KDR/HDAC9/C3/SPHK1/PRKD2/BTG1/VEGFC/CFLAR/ACVRL1/CD40/ANGPT2/ENG/ECM1/ANXA1/RAMP2/PTGS2/TGFBR2/ERAP1/PGF/TLR3/HK2/IL1B/CX3CL1/ANXA3/NOS3/TNFSF12/ITGA5
GO:0002244	GO:0002244	hematopoietic progenitor cell differentiation	142	0.494510774	1.731475136	0.001552795	0.030113569	0.025636496	1909	tags=30%, list=17%, signal=25%	HERC6/PTPRC/PSMB9/PLEK/EIF2AK2/GATA3/PTPN6/HYAL2/PSME2/ADAR/PSMB8/PSMC2/SOX4/PSMA7/CBFB/PSME1/SFRP1/EML1/PSMA3/LMO2/PSMD7/PSMD14/TOP2A/PSMA5/PSMA6/PSMC6/RRS1/BATF/HIST1H3G/TAL1/PSMB4/PSMC4/PSMA4/PSMB2/ARHGEF7/PSME4/PDCD2/PSMD11/PSMB10/JAM3/NOTCH1/TCF3/AGPAT5
GO:0033209	GO:0033209	tumor necrosis factor-mediated signaling pathway	142	0.497983568	1.743634742	0.001552795	0.030113569	0.025636496	1817	tags=35%, list=17%, signal=30%	PYCARD/CASP1/TNFRSF1B/PSMB9/STAT1/PSME2/SYK/CASP4/LTB/PSMB8/PSMC2/SPHK1/PSMA7/CARD8/PSME1/BIRC3/CD27/TNFRSF21/CD40/PSMA3/TNFRSF4/PSMD7/FAS/TJP2/PSMD14/LIMS1/AIM2/PSMA5/CASP8/TRAF1/PSMA6/TNFRSF14/RBCK1/PSMC6/CYLD/TNFRSF12A/TNFSF14/IKBKB/TNFRSF10B/TNFRSF17/PSMB4/PSMC4/PSMA4/TNFSF12/PSMB2/PSME4/PSMD11/PSMB10/SPPL2B/TNFRSF11B
GO:0050866	GO:0050866	negative regulation of cell activation	137	0.488114021	1.704368491	0.001552795	0.030113569	0.025636496	1064	tags=22%, list=10%, signal=20%	LYN/CD300A/LST1/SAMSN1/HLX/IDO1/MNDA/MERTK/HMOX1/PTPN6/LILRB2/PDGFRA/IL13RA2/CD86/PELI1/LRRC32/THBD/BTK/LGALS9/CCR2/CD74/TNFRSF21/SFRP1/INPP5D/CASP3/BCL6/SERPINE2/SMAD7/ANXA1/HLA-G
GO:0002221	GO:0002221	pattern recognition receptor signaling pathway	138	0.632421012	2.21000589	0.00155521	0.030113569	0.025636496	1060	tags=30%, list=10%, signal=28%	RSAD2/ITGB2/FCN1/CD36/CD14/LYN/IFIH1/LY96/CTSS/TLR2/IRF7/CD300A/DDX58/TLR1/CLEC7A/ITGAM/LTF/DDX60/MYD88/DHX58/TRIM5/S100A8/MARCO/PELI1/CTSK/BTK/RFTN1/RPS6KA3/LGMN/RNF125/TLR7/BIRC3/NOD2/LILRA2/TNIP2/C1QBP/CAV1/CTSB/CASP8/TLR4/FADD/COLEC12
GO:0071346	GO:0071346	cellular response to interferon-gamma	139	0.691035802	2.417564115	0.00155521	0.030113569	0.025636496	1528	tags=42%, list=14%, signal=37%	OAS3/OAS2/HCK/IFI30/OAS1/HLA-DQB1/GBP2/IRF7/CASP1/CCL4/NMI/GBP1/HLA-DPA1/TRIM22/HLA-DQA1/PPARG/IRF8/CD44/HLA-DPB1/CCL5/OASL/TRIM21/STAT1/HLA-DRA/HLA-DRB1/CCL8/TRIM5/TRIM38/HLA-E/CCL19/CD58/SP100/LGALS9/IRF9/HLA-F/HLA-B/CCL2/HLA-A/CDC37/ACTR3/VCAM1/SYNCRIP/CCL21/CCL18/MID1/HLA-G/IFNGR1/IFNGR2/SUMO1/HLA-DQB2/TLR3/CCL20/RAB20/B2M/HLA-C/MED1/CX3CL1/FLNB/STX4
GO:0097529	GO:0097529	myeloid leukocyte migration	146	0.491549115	1.724264391	0.00155521	0.030113569	0.025636496	1092	tags=25%, list=10%, signal=23%	ITGB2/C3AR1/CX3CR1/FCER1G/LYN/CCR1/CD300A/CCL4/PLA2G7/PDGFD/RAC2/CCL5/PECAM1/NCKAP1L/C5AR1/SYK/CKLF/CCL8/S100A8/VAV1/CXCL12/CXCL10/CCL19/EDNRB/RPS19/VEGFC/CCR2/CCL2/CD74/SWAP70/PF4/CCL21/CCL18/C1QBP/MTUS1/ANXA1/MPP1
GO:0001959	GO:0001959	regulation of cytokine-mediated signaling pathway	132	0.498981106	1.728202656	0.001560062	0.030113569	0.025636496	1484	tags=28%, list=14%, signal=25%	PTPRC/PYCARD/IRF7/CASP1/PPARG/CCL5/PTPN6/STAT1/TREM2/SYK/ADAR/CASP4/CNOT7/ANGPT1/SPHK1/CBFB/CARD8/BIRC3/CD74/IFNAR1/CDC37/SLIT3/CAV1/CASP8/TRAF1/ECM1/FADD/IFNGR1/UBE2K/RBCK1/IFNGR2/SUMO1/CYLD/IKBKB/ABCE1/IFNAR2/MED1
GO:0010950	GO:0010950	positive regulation of endopeptidase activity	132	0.453846423	1.571880347	0.001560062	0.030113569	0.025636496	1643	tags=30%, list=15%, signal=26%	IFI27/LYN/PYCARD/CASP1/IFI16/PPARG/BID/PSME2/TNFSF10/CASP4/S100A8/CASP7/LGALS9/LCK/CARD8/CFLAR/PSME1/ARL6IP5/BAK1/FAS/PSMD14/CASP3/AIM2/RPS27L/CASP8/FADD/BAX/EPHA4/ANP32B/VCP/MAP3K5/TNFRSF10B/HSPE1/PDCD5/PPM1F/HTRA2/CYCS/PMAIP1/PDCD2/NLRP1
GO:0043123	GO:0043123	positive regulation of I-kappaB kinase/NF-kappaB signaling	135	0.539048985	1.874622348	0.001560062	0.030113569	0.025636496	1644	tags=32%, list=15%, signal=27%	CD36/CASP1/HTR2B/TRIM22/UBD/LTF/MYD88/HMOX1/IFIT5/APOL3/PRKCB/PLK2/TNFSF10/TRIM5/TRIM38/PELI1/CCL19/SECTM1/LGALS9/CFLAR/BIRC3/CD74/NOD2/CD40/SLC20A1/GPRC5B/S100A4/CCL21/LGALS1/TNIP2/CASP8/ECM1/FADD/GOLT1B/RBCK1/UBE2I/IKBKB/TNFRSF10B/ECT2/TGM2/TICAM1/IRAK1/REL
GO:0043901	GO:0043901	negative regulation of multi-organism process	134	0.701668768	2.433640987	0.001560062	0.030113569	0.025636496	632	tags=28%, list=6%, signal=27%	MX1/RSAD2/ISG15/ISG20/OAS3/OAS2/FCN1/OAS1/CD36/APOBEC3A/IFIT1/IFITM1/CCL4/IFI16/PLSCR1/PTX3/IRF8/CCL5/EIF2AK2/OASL/ADA/MICB/LTF/APOBEC3G/TRIM21/IFITM3/STAT1/IFIT5/ADAR/ARHGDIB/DHX58/TRIM5/C19orf66/FCN3/TRIM14/RNF125/TIMP1/CARD8
GO:0045766	GO:0045766	positive regulation of angiogenesis	132	0.447650487	1.55042095	0.001560062	0.030113569	0.025636496	1565	tags=30%, list=14%, signal=26%	ITGB2/C3AR1/CX3CR1/CYBB/APLNR/AGTR1/HMOX1/C5AR1/PRKCB/CDH5/PLK2/NRP1/CD34/TWIST1/KDR/HDAC9/C3/SPHK1/PRKD2/BTG1/VEGFC/ACVRL1/CD40/ANGPT2/ENG/ECM1/ANXA1/RAMP2/PTGS2/TGFBR2/ERAP1/PGF/TLR3/HK2/IL1B/CX3CL1/ANXA3/NOS3/TNFSF12/ITGA5
GO:0050707	GO:0050707	regulation of cytokine secretion	132	0.613574272	2.125091858	0.001560062	0.030113569	0.025636496	775	tags=25%, list=7%, signal=24%	FCN1/CD14/LYN/IFIH1/PYCARD/TLR2/CASP1/POSTN/GBP1/DDX58/TLR1/CSF1R/FN1/HTR2B/SRGN/GATA3/FGR/HYAL2/SYK/SYT11/CD34/LRRC32/TWIST1/CCL19/CD58/ANGPT1/LGALS9/CLEC5A/CARD8/ANXA4/NOD2/TNFRSF21/CRTAM
GO:0030168	GO:0030168	platelet activation	140	0.442616096	1.547078918	0.0015625	0.030113569	0.025636496	1021	tags=21%, list=9%, signal=19%	FCER1G/COL1A2/LYN/PLSCR1/HBB/COL3A1/RAC2/LCP2/PLEK/MERTK/PTPN6/PDGFRA/SYK/PRKCB/PRKCH/VAV1/THBD/RHOG/GNA15/RAP2B/LCK/VWF/F8/CD40/PF4/CLIC1/SERPINE2/LAT/TLR4
GO:0060759	GO:0060759	regulation of response to cytokine stimulus	140	0.520521086	1.819380737	0.0015625	0.030113569	0.025636496	1484	tags=28%, list=14%, signal=24%	PTPRC/IFIH1/PYCARD/IRF7/CASP1/DDX58/PPARG/CCL5/PTPN6/STAT1/TREM2/SYK/ADAR/CASP4/CNOT7/ANGPT1/SPHK1/CBFB/CARD8/BIRC3/CD74/IFNAR1/CDC37/SLIT3/CAV1/CASP8/TRAF1/ECM1/FADD/IFNGR1/UBE2K/RBCK1/IFNGR2/SUMO1/CYLD/IKBKB/ABCE1/IFNAR2/MED1
GO:0050864	GO:0050864	regulation of B cell activation	102	0.612360747	2.066459189	0.001584786	0.030113569	0.025636496	1271	tags=35%, list=12%, signal=32%	PTPRC/LYN/CD300A/IGHM/SAMSN1/MNDA/ADA/NCKAP1L/IGHA1/PTPN6/SYK/SASH3/CD38/PELI1/TRBC1/MEF2C/IGHV3-23/BTK/IGKC/PPP2R3C/CD74/AHR/NOD2/CD27/TNFRSF21/SFRP1/CD40/TNFRSF4/INPP5D/CASP3/TNIP2/BCL6/TLR4/GPR183/CYLD/TRDC
GO:0038095	GO:0038095	Fc-epsilon receptor signaling pathway	125	0.501392547	1.722060464	0.001587302	0.030113569	0.025636496	2464	tags=46%, list=22%, signal=36%	FCER1G/LYN/PSMB9/LCP2/LAT2/PSME2/KRAS/SYK/IGKV3-20/IGLV2-14/NRAS/VAV1/IGHV3-23/BTK/IGLV1-40/PSMB8/PSMC2/PSMA7/PSME1/IGKC/GRB2/PSMA3/PSMD7/PSMD14/IGKV4-1/PSMA5/LAT/PSMA6/PSMC6/IGHV1-69/UBE2D1/IGHV3-9/PPP3CA/IKBKB/PSMB4/PSMC4/IGLV3-19/PSMA4/PSMB2/PSME4/PSMD11/PSMB10/UBE2D2/CALM1/BCL10/PLCG1/PSMB5/PSMD4/PSMD12/PSMD10/MALT1/PLCG2/PSMD13/MAPK1/ITK/PSMD1/PAK2/IGLV6-57
GO:0002223	GO:0002223	stimulatory C-type lectin receptor signaling pathway	100	0.537708029	1.812767832	0.001589825	0.030113569	0.025636496	2490	tags=46%, list=23%, signal=36%	FCER1G/LYN/PSMB9/CLEC7A/ICAM2/PSME2/KRAS/SYK/NRAS/CLEC10A/PSMB8/CLEC4A/PSMC2/PSMA7/PSME1/PSMA3/PSMD7/PSMD14/PSMA5/PSMA6/PSMC6/ICAM3/UBE2D1/IKBKB/PSMB4/PSMC4/PSMA4/PSMB2/PSME4/PSMD11/PSMB10/UBE2D2/CREBBP/KLRK1/EP300/BCL10/PSMB5/PSMD4/PSMD12/PSMD10/MALT1/PLCG2/PSMD13/PSMD1/PAK2/RELB
GO:0030183	GO:0030183	B cell differentiation	100	0.501877053	1.691971345	0.001589825	0.030113569	0.025636496	1538	tags=29%, list=14%, signal=25%	ADA/DOCK10/NCKAP1L/PTPN6/MFNG/SYK/CEBPG/BTK/HDAC9/ITM2A/CD79B/PPP2R3C/CD27/BAK1/SFRP1/INPP5D/VCAM1/LGALS1/BCL6/LYL1/BAX/GPR183/HDAC5/CYLD/BLNK/ITGA4/HHEX/FCGR2B/RBPJ
GO:0002220	GO:0002220	innate immune response activating cell surface receptor signaling pathway	103	0.559443573	1.884589991	0.001594896	0.030113569	0.025636496	2490	tags=48%, list=23%, signal=37%	FCER1G/FCN1/LYN/PSMB9/CLEC7A/ICAM2/PSME2/KRAS/SYK/NRAS/CLEC10A/PSMB8/CLEC4A/PSMC2/PSMA7/PSME1/PSMA3/PSMD7/PSMD14/LILRA2/PSMA5/PSMA6/PSMC6/ICAM3/UBE2D1/IKBKB/PSMB4/PSMC4/PSMA4/PSMB2/PSME4/PSMD11/FFAR2/PSMB10/UBE2D2/CREBBP/KLRK1/EP300/BCL10/PSMB5/PSMD4/PSMD12/PSMD10/MALT1/PLCG2/PSMD13/PSMD1/PAK2/RELB
GO:0002224	GO:0002224	toll-like receptor signaling pathway	103	0.639025896	2.152677883	0.001594896	0.030113569	0.025636496	1378	tags=35%, list=13%, signal=31%	RSAD2/ITGB2/CD36/CD14/LYN/LY96/CTSS/TLR2/IRF7/CD300A/TLR1/ITGAM/LTF/MYD88/S100A8/PELI1/CTSK/BTK/RFTN1/RPS6KA3/LGMN/TLR7/BIRC3/LILRA2/TNIP2/CAV1/CTSB/CASP8/TLR4/FADD/COLEC12/ARRB2/UBE2D1/TLR3/IKBKB/CD180
GO:0002706	GO:0002706	regulation of lymphocyte mediated immunity	103	0.493081054	1.66103547	0.001594896	0.030113569	0.025636496	1482	tags=23%, list=13%, signal=20%	RSAD2/FCER1G/PTPRC/GATA3/PTPN6/SASH3/HLA-E/VAV1/BTK/C3/LGALS9/GYPC/CD40/CRTAM/BCL6/FAM49B/SMAD7/FADD/IL7R/ARRB2/B2M/TBX21/IL1B/FCGR2B
GO:0032946	GO:0032946	positive regulation of mononuclear cell proliferation	105	0.571915218	1.932526057	0.001594896	0.030113569	0.025636496	1195	tags=32%, list=11%, signal=29%	PTPRC/PYCARD/CORO1A/HLA-DPA1/HLA-DPB1/CCL5/ADA/NCKAP1L/HLA-DMB/LILRB2/CD86/SYK/SASH3/EBI3/CD38/HLA-E/PELI1/MEF2C/CCL19/LGALS9/CCR2/CD74/CD40/TNFRSF4/NCK1/VCAM1/IL6ST/BCL6/TLR4/FADD/ANXA1/IL18/GPR183/TGFBR2
GO:0050777	GO:0050777	negative regulation of immune response	111	0.573212805	1.945363709	0.001594896	0.030113569	0.025636496	1140	tags=28%, list=10%, signal=25%	PTPRC/LYN/CD300A/NMI/IFI16/SAMSN1/COL3A1/PPARG/HLX/A2M/HMOX1/PTPN6/IL13RA2/ADAR/DHX58/HLA-E/CNOT7/ANGPT1/LGALS9/SERPING1/RPS19/CCR2/NOD2/INPP5D/BCL6/GPX1/SMAD7/ANXA1/HLA-G/IL7R/ARRB2
GO:0051250	GO:0051250	negative regulation of lymphocyte activation	105	0.527438431	1.782237084	0.001594896	0.030113569	0.025636496	1064	tags=23%, list=10%, signal=21%	LYN/CD300A/LST1/SAMSN1/HLX/IDO1/MNDA/MERTK/PTPN6/LILRB2/CD86/PELI1/LRRC32/BTK/LGALS9/CD74/TNFRSF21/SFRP1/INPP5D/CASP3/BCL6/SMAD7/ANXA1/HLA-G
GO:0002285	GO:0002285	lymphocyte activation involved in immune response	124	0.509243366	1.748258106	0.001597444	0.030113569	0.025636496	1482	tags=25%, list=13%, signal=22%	FCER1G/LCP1/CORO1A/HLX/GATA3/ADA/DOCK10/HLA-DMB/MFNG/CD86/CCL19/LGALS9/ITM2A/CD40/SWAP70/LGALS1/BCL6/ITGAL/SMAD7/TLR4/IL18R1/ANXA1/IL18/GPR183/BATF/CD180/SLC11A1/TBX21/CD244/NBN/FCGR2B
GO:0042129	GO:0042129	regulation of T cell proliferation	120	0.527869205	1.804073357	0.001597444	0.030113569	0.025636496	1195	tags=27%, list=11%, signal=24%	PTPRC/PYCARD/CORO1A/HLA-DPA1/RAC2/IDO1/HLA-DPB1/CCL5/NCKAP1L/HLA-DMB/PTPN6/LILRB2/CD86/SYK/SASH3/EBI3/HLA-E/PELI1/LRRC32/CCL19/LGALS9/CCR2/TNFRSF21/NCK1/CASP3/VCAM1/IL6ST/FADD/ANXA1/HLA-G/IL18/TGFBR2
GO:0016064	GO:0016064	immunoglobulin mediated immune response	108	0.605028244	2.044227781	0.0016	0.030113569	0.025636496	1502	tags=32%, list=14%, signal=28%	C1QA/C1QB/FCER1G/HLA-DQB1/IRF7/IGHM/IGHA1/PTPN6/IL13RA2/IGKV3-20/IGLV2-14/TRBC1/IGHV3-23/BTK/IGLV1-40/C3/SERPING1/IGKC/CD74/CD27/CD40/SWAP70/C2/INPP5D/IGKV4-1/BCL6/C1QBP/IGHV1-69/IGHV3-9/TRDC/BATF/TBX21/NBN/FCGR2B/IGLV3-19
GO:0019724	GO:0019724	B cell mediated immunity	108	0.605028244	2.044227781	0.0016	0.030113569	0.025636496	1502	tags=32%, list=14%, signal=28%	C1QA/C1QB/FCER1G/HLA-DQB1/IRF7/IGHM/IGHA1/PTPN6/IL13RA2/IGKV3-20/IGLV2-14/TRBC1/IGHV3-23/BTK/IGLV1-40/C3/SERPING1/IGKC/CD74/CD27/CD40/SWAP70/C2/INPP5D/IGKV4-1/BCL6/C1QBP/IGHV1-69/IGHV3-9/TRDC/BATF/TBX21/NBN/FCGR2B/IGLV3-19
GO:0046718	GO:0046718	viral entry into host cell	101	0.48670905	1.642905852	0.0016	0.030113569	0.025636496	1198	tags=26%, list=11%, signal=23%	FCN1/IFITM1/PTX3/CXCR4/TRIM21/IFITM3/HYAL2/CD86/TRIM5/TRIM38/CCR5/FCN3/LGALS9/CLEC5A/SCARB2/CD74/TNFRSF4/LGALS1/CAV1/CTSB/CAV2/NPC1/NUP153/SIVA1/TNFRSF14/DYNLT1
GO:0071706	GO:0071706	tumor necrosis factor superfamily cytokine production	101	0.653161623	2.204773167	0.0016	0.030113569	0.025636496	1224	tags=33%, list=11%, signal=29%	FCER1G/CD36/CD14/IFIH1/LY96/PYCARD/TLR2/CYBB/DDX58/TLR1/LTF/CD86/SASH3/SYT11/CD34/HLA-E/TWIST1/CCL19/GPR18/ANGPT1/LGALS9/UBE2J1/SPON2/CCR2/NOD2/PF4/HDAC2/APP/TLR4/FADD/ARRB2/ACP5/CD2
GO:0002819	GO:0002819	regulation of adaptive immune response	109	0.579080533	1.960518451	0.001602564	0.030113569	0.025636496	1482	tags=28%, list=13%, signal=25%	RSAD2/FCER1G/PTPRC/CD48/PYCARD/IRF7/SAMSN1/HLX/GATA3/ADA/PTPN6/SASH3/HLA-E/MEF2C/CCL19/BTK/C3/CCR2/CD40/IL6ST/BCL6/FAM49B/SMAD7/FADD/ANXA1/IL7R/SLC11A1/B2M/TBX21/IL1B/FCGR2B
GO:0050671	GO:0050671	positive regulation of lymphocyte proliferation	104	0.573541043	1.93678702	0.001602564	0.030113569	0.025636496	1195	tags=33%, list=11%, signal=29%	PTPRC/PYCARD/CORO1A/HLA-DPA1/HLA-DPB1/CCL5/ADA/NCKAP1L/HLA-DMB/LILRB2/CD86/SYK/SASH3/EBI3/CD38/HLA-E/PELI1/MEF2C/CCL19/LGALS9/CCR2/CD74/CD40/TNFRSF4/NCK1/VCAM1/IL6ST/BCL6/TLR4/FADD/ANXA1/IL18/GPR183/TGFBR2
GO:0070665	GO:0070665	positive regulation of leukocyte proliferation	109	0.582422358	1.971832436	0.001602564	0.030113569	0.025636496	1195	tags=32%, list=11%, signal=29%	PTPRC/LYN/PYCARD/CORO1A/HLA-DPA1/HLA-DPB1/CCL5/ADA/NCKAP1L/HLA-DMB/LILRB2/CD86/SYK/SASH3/EBI3/CD38/HLA-E/PELI1/MEF2C/CCL19/LGALS9/CCR2/CD74/CD40/TNFRSF4/NCK1/VCAM1/IL6ST/BCL6/TLR4/FADD/ANXA1/IL18/GPR183/TGFBR2
GO:1903900	GO:1903900	regulation of viral life cycle	109	0.732589208	2.480233019	0.001602564	0.030113569	0.025636496	988	tags=34%, list=9%, signal=31%	MX1/RSAD2/ISG15/ISG20/OAS3/OAS2/FCN1/OAS1/APOBEC3A/IFIT1/IFITM1/IFI16/PLSCR1/PTX3/CCL5/EIF2AK2/OASL/LTF/APOBEC3G/TRIM21/IFITM3/IFIT5/ADAR/TRIM5/TRIM38/C19orf66/CNOT7/FCN3/LGALS9/STOM/PKN2/CD74/LGALS1/TOP2A/VPS4B/CAV2/ZC3HAV1
GO:0002822	GO:0002822	regulation of adaptive immune response based on somatic recombination of immune receptors built from immunoglobulin superfamily domains	99	0.529700615	1.78019978	0.001610306	0.030113569	0.025636496	1482	tags=26%, list=13%, signal=23%	RSAD2/FCER1G/PTPRC/HLX/GATA3/ADA/PTPN6/SASH3/HLA-E/MEF2C/CCL19/BTK/C3/CCR2/CD40/BCL6/FAM49B/SMAD7/FADD/ANXA1/IL7R/SLC11A1/B2M/TBX21/IL1B/FCGR2B
GO:0045619	GO:0045619	regulation of lymphocyte differentiation	122	0.451834964	1.545188323	0.001610306	0.030113569	0.025636496	1251	tags=25%, list=11%, signal=23%	HLX/GATA3/ADA/NCKAP1L/PTPN6/LILRB2/CD86/SYK/SASH3/ITPKB/CCL19/BTK/LGALS9/CD83/CBFB/PPP2R3C/ZEB1/CD74/CD27/SFRP1/INPP5D/LILRB4/BCL6/SMAD7/ANXA1/HLA-G/IL7R/IL18/TGFBR2/CD2/CYLD
GO:0050729	GO:0050729	positive regulation of inflammatory response	99	0.513661322	1.726295471	0.001610306	0.030113569	0.025636496	1736	tags=35%, list=16%, signal=30%	FCER1G/TLR2/CCL4/PLA2G7/FABP4/AGTR1/IDO1/MYD88/HYAL2/S100A8/BTK/C3/PDE2A/RPS19/TLR7/CCR2/NOD2/MGST2/GPRC5B/IL6ST/CCL18/TLR4/IL18/PTGS2/TLR3/PDCD4/IL1B/CX3CL1/TGM2/TICAM1/CD47/MAPK13/ETS1/S100A9/FFAR2
GO:0051092	GO:0051092	positive regulation of NF-kappaB transcription factor activity	122	0.516537053	1.766456973	0.001610306	0.030113569	0.025636496	1764	tags=30%, list=16%, signal=26%	ITGB2/CD36/PYCARD/TLR2/TRIM22/EIF2AK2/LTF/MYD88/KRAS/PRKCB/PRKCH/TRIM5/TRIM38/S100A8/BTK/TRIM14/LGALS9/SPHK1/PRKD2/CFLAR/NOD2/CD40/AIM2/APP/TRAF1/TLR4/PSMA6/RBCK1/TLR3/IKBKB/NPM1/IL1B/TICAM1/IRAK1/S100A9/MTDH/CAT
GO:0002695	GO:0002695	negative regulation of leukocyte activation	121	0.529549788	1.807757606	0.001612903	0.030113569	0.025636496	1064	tags=22%, list=10%, signal=20%	LYN/CD300A/LST1/SAMSN1/HLX/IDO1/MNDA/MERTK/HMOX1/PTPN6/LILRB2/IL13RA2/CD86/PELI1/LRRC32/BTK/LGALS9/CCR2/CD74/TNFRSF21/SFRP1/INPP5D/CASP3/BCL6/SMAD7/ANXA1/HLA-G
GO:0001906	GO:0001906	cell killing	107	0.473480778	1.594206866	0.001618123	0.030113569	0.025636496	1217	tags=25%, list=11%, signal=23%	LYZ/PTPRC/CORO1A/MICB/LTF/PTPN6/GZMB/CEBPG/HLA-E/VAV1/PRF1/GNLY/LGALS9/DEFA4/GYPC/RPS19/CRTAM/PF4/EMP2/FAM49B/APOL1/FADD/DNASE1L3/IL7R/IL18/ARRB2/SLAMF7
GO:0002687	GO:0002687	positive regulation of leukocyte migration	107	0.491040539	1.653330472	0.001618123	0.030113569	0.025636496	1346	tags=28%, list=12%, signal=25%	C3AR1/PYCARD/CCR1/CCL4/PLA2G7/PDGFD/RAC2/CCL5/NCKAP1L/C5AR1/CCL8/CXCL12/CXCL10/CCL19/LGALS9/VEGFC/CCR2/CD74/SWAP70/PF4/ADAM10/CCL21/C1QBP/THY1/APP/FADD/PGF/ITGA4/CCL20/TNFSF14
GO:0002673	GO:0002673	regulation of acute inflammatory response	88	0.599949127	1.980000787	0.001620746	0.030113569	0.025636496	1502	tags=35%, list=14%, signal=31%	C1QA/C1QB/C3AR1/FCER1G/PPARG/A2M/C5AR1/CFP/CFH/IGKV3-20/IGLV2-14/CFB/IGHV3-23/BTK/IGLV1-40/C3/EDNRB/SERPING1/IGKC/PROS1/C2/IGKV4-1/IL6ST/C1QBP/DNASE1L3/PTGS2/IGHV1-69/IGHV3-9/IL1B/FCGR2B/IGLV3-19
GO:0008037	GO:0008037	cell recognition	106	0.629633667	2.120880834	0.001623377	0.030113569	0.025636496	1271	tags=32%, list=12%, signal=29%	FCN1/CD36/DOCK2/IGHM/CLEC7A/PECAM1/IGHA1/PCDH12/NRP1/FOLR2/SMAGP/PRF1/TRBC1/IGHV3-23/CCL19/FCN3/VCAN/CRTAC1/MFGE8/CSGALNACT1/GYPC/IGKC/CRTAM/MSN/CCL21/CCT5/APP/CCT3/COLEC12/CCT2/EPHA4/CCT8/CCT4/TRDC
GO:1902107	GO:1902107	positive regulation of leukocyte differentiation	114	0.486864287	1.649844906	0.001623377	0.030113569	0.025636496	1251	tags=28%, list=11%, signal=25%	HCLS1/EVI2B/CCR1/HLX/GATA3/ADA/NCKAP1L/LILRB2/CD86/SYK/SASH3/ITPKB/CCL19/BTK/LGALS9/CD83/PPP2R3C/CD74/CD27/PF4/INPP5D/LILRB4/BCL6/TESC/CASP8/FADD/ANXA1/HLA-G/IL7R/IL18/TGFBR2/CYLD
GO:0002831	GO:0002831	regulation of response to biotic stimulus	96	0.559068845	1.861524315	0.001626016	0.030113569	0.025636496	933	tags=25%, list=8%, signal=23%	HERC5/LY96/PYCARD/IFIT1/DDX58/LY86/MICB/LTF/APOBEC3G/DDX60/STAT1/DHX58/SYT11/TRIM5/RNF125/GYPC/SCARB2/CARD8/PPP2R3C/BIRC3/CRTAM/AIM2/LILRA2/C1QBP
GO:0050921	GO:0050921	positive regulation of chemotaxis	115	0.484378497	1.645515038	0.001626016	0.030113569	0.025636496	933	tags=23%, list=8%, signal=22%	C3AR1/CCR1/CCL4/PLA2G7/PDGFD/RAC2/CCL5/NCKAP1L/C5AR1/NRP1/S1PR1/CXCL12/KDR/CXCL10/CCL19/CDH13/LGALS9/PRKD2/VEGFC/CCR2/CD74/SWAP70/PF4/ADAM10/CCL21/IL16/C1QBP
GO:0002761	GO:0002761	regulation of myeloid leukocyte differentiation	94	0.515417027	1.709419838	0.001631321	0.030113569	0.025636496	1057	tags=21%, list=10%, signal=19%	TYROBP/LYN/HCLS1/EVI2B/CCR1/IRF7/RASSF2/LTF/NME1/FBN1/CD74/SFRP1/TJP2/PF4/INPP5D/LILRB4/TESC/CASP8/TLR4/FADD
GO:0050715	GO:0050715	positive regulation of cytokine secretion	94	0.627510941	2.081187847	0.001631321	0.030113569	0.025636496	881	tags=27%, list=8%, signal=25%	FCN1/CD14/IFIH1/PYCARD/TLR2/CASP1/POSTN/DDX58/TLR1/CSF1R/HTR2B/GATA3/FGR/HYAL2/SYK/CD34/TWIST1/CCL19/CD58/LGALS9/CLEC5A/CARD8/NOD2/CRTAM/AIM2
GO:0032680	GO:0032680	regulation of tumor necrosis factor production	95	0.654189919	2.171208017	0.001633987	0.030113569	0.025636496	1224	tags=33%, list=11%, signal=29%	FCER1G/CD36/CD14/IFIH1/LY96/PYCARD/TLR2/CYBB/DDX58/TLR1/LTF/SASH3/SYT11/CD34/HLA-E/TWIST1/CCL19/GPR18/ANGPT1/LGALS9/UBE2J1/SPON2/CCR2/NOD2/PF4/HDAC2/TLR4/FADD/ARRB2/ACP5/CD2
GO:0032479	GO:0032479	regulation of type I interferon production	97	0.624715431	2.08019742	0.001636661	0.030113569	0.025636496	1644	tags=33%, list=15%, signal=28%	ISG15/HERC5/CD14/IFIH1/PYCARD/TLR2/IRF7/NMI/DDX58/IFI16/TRIM21/MYD88/STAT1/UBE2L6/SYK/DHX58/RNF125/DDX41/TLR7/TREX1/POLR2F/TLR4/YY1/LRRFIP1/UBA7/CYLD/TLR3/TICAM1/IRAK1/HMGB2/POLR2K/REL
GO:0032606	GO:0032606	type I interferon production	98	0.622953656	2.078081542	0.001636661	0.030113569	0.025636496	1644	tags=33%, list=15%, signal=28%	ISG15/HERC5/CD14/IFIH1/PYCARD/TLR2/IRF7/NMI/DDX58/IFI16/TRIM21/MYD88/STAT1/UBE2L6/SYK/DHX58/RNF125/DDX41/TLR7/TREX1/POLR2F/TLR4/YY1/LRRFIP1/UBA7/CYLD/TLR3/TICAM1/IRAK1/HMGB2/POLR2K/REL
GO:0032640	GO:0032640	tumor necrosis factor production	97	0.654758835	2.180236908	0.001636661	0.030113569	0.025636496	1224	tags=33%, list=11%, signal=30%	FCER1G/CD36/CD14/IFIH1/LY96/PYCARD/TLR2/CYBB/DDX58/TLR1/LTF/SASH3/SYT11/CD34/HLA-E/TWIST1/CCL19/GPR18/ANGPT1/LGALS9/UBE2J1/SPON2/CCR2/NOD2/PF4/HDAC2/APP/TLR4/FADD/ARRB2/ACP5/CD2
GO:0046631	GO:0046631	alpha-beta T cell activation	98	0.546455256	1.822894159	0.001636661	0.030113569	0.025636496	1417	tags=30%, list=13%, signal=26%	RSAD2/DOCK2/CD300A/HLX/GATA3/ADA/NCKAP1L/CD86/SYK/SASH3/EBI3/ITPKB/HLA-E/CCL19/GPR18/LGALS9/CD83/CCR2/SATB1/BCL6/SMAD7/IL18R1/ANXA1/IL18/GPR183/TGFBR2/BATF/ELF4/TBX21
GO:0051209	GO:0051209	release of sequestered calcium ion into cytosol	87	0.517330521	1.702483139	0.001636661	0.030113569	0.025636496	1178	tags=20%, list=11%, signal=18%	PTPRC/LYN/CORO1A/APLNR/HTR2B/CLIC2/PTPN6/CCR5/CXCL10/CCL19/LCK/CCL21/THY1/BAX/CALM3/MYO5A/ITPR3
GO:0051282	GO:0051282	regulation of sequestering of calcium ion	87	0.517330521	1.702483139	0.001636661	0.030113569	0.025636496	1178	tags=20%, list=11%, signal=18%	PTPRC/LYN/CORO1A/APLNR/HTR2B/CLIC2/PTPN6/CCR5/CXCL10/CCL19/LCK/CCL21/THY1/BAX/CALM3/MYO5A/ITPR3
GO:0051283	GO:0051283	negative regulation of sequestering of calcium ion	87	0.517330521	1.702483139	0.001636661	0.030113569	0.025636496	1178	tags=20%, list=11%, signal=18%	PTPRC/LYN/CORO1A/APLNR/HTR2B/CLIC2/PTPN6/CCR5/CXCL10/CCL19/LCK/CCL21/THY1/BAX/CALM3/MYO5A/ITPR3
GO:0071621	GO:0071621	granulocyte chemotaxis	87	0.521186148	1.715171622	0.001636661	0.030113569	0.025636496	1092	tags=25%, list=10%, signal=23%	ITGB2/C3AR1/FCER1G/CCL4/RAC2/CCL5/NCKAP1L/C5AR1/SYK/CKLF/CCL8/S100A8/VAV1/CCL19/CCL2/CD74/PF4/CCL21/CCL18/C1QBP/ANXA1/MPP1
GO:0072376	GO:0072376	protein activation cascade	98	0.590239768	1.968952835	0.001636661	0.030113569	0.025636496	1020	tags=31%, list=9%, signal=28%	C1QA/C1QB/C3AR1/FCN1/VSIG4/IGHM/CFD/A2M/IGHA1/C5AR1/CFP/CFH/IGKV3-20/IGLV2-14/CFB/TRBC1/PRCP/IGHV3-23/IGLV1-40/FCN3/C3/SERPING1/IGKC/VWF/F8/PROS1/C2/IGKV4-1/C1QBP/F13A1
GO:1903555	GO:1903555	regulation of tumor necrosis factor superfamily cytokine production	98	0.655911363	2.188023593	0.001636661	0.030113569	0.025636496	1224	tags=33%, list=11%, signal=29%	FCER1G/CD36/CD14/IFIH1/LY96/PYCARD/TLR2/CYBB/DDX58/TLR1/LTF/CD86/SASH3/SYT11/CD34/HLA-E/TWIST1/CCL19/GPR18/ANGPT1/LGALS9/UBE2J1/SPON2/CCR2/NOD2/PF4/HDAC2/TLR4/FADD/ARRB2/ACP5/CD2
GO:0051208	GO:0051208	sequestering of calcium ion	90	0.500111014	1.649299817	0.001642036	0.030113569	0.025636496	1178	tags=19%, list=11%, signal=17%	PTPRC/LYN/CORO1A/APLNR/HTR2B/CLIC2/PTPN6/CCR5/CXCL10/CCL19/LCK/CCL21/THY1/BAX/CALM3/MYO5A/ITPR3
GO:0010324	GO:0010324	membrane invagination	61	0.684331625	2.149677658	0.001647446	0.030113569	0.025636496	680	tags=34%, list=6%, signal=32%	ITGB2/FCER1G/CD36/CD300A/IGHM/PPARG/RAC2/ITGAM/NCKAP1L/IGHA1/TREM2/SYT11/ARHGAP25/ABCA1/TRBC1/IGHV3-23/RHOG/C3/MFGE8/SCARB2/IGKC
GO:0031295	GO:0031295	T cell costimulation	62	0.654287893	2.0487557	0.001647446	0.030113569	0.025636496	1346	tags=39%, list=12%, signal=34%	LYN/HLA-DQB1/HLA-DPA1/HLA-DQA1/HLA-DPB1/PTPN6/HLA-DRA/CD3D/HLA-DRB1/CD86/VAV1/TRBC1/CCL19/CD247/LCK/CSK/GRB2/CCL21/LGALS1/CAV1/TNFRSF14/HLA-DQB2/MAP3K8/TNFSF14
GO:0032945	GO:0032945	negative regulation of mononuclear cell proliferation	62	0.568547176	1.780277887	0.001647446	0.030113569	0.025636496	841	tags=24%, list=8%, signal=22%	LYN/CD300A/LST1/IDO1/MNDA/PTPN6/LILRB2/CD86/PELI1/LRRC32/BTK/LGALS9/TNFRSF21/INPP5D/CASP3
GO:0046634	GO:0046634	regulation of alpha-beta T cell activation	62	0.56920848	1.782348612	0.001647446	0.030113569	0.025636496	1195	tags=32%, list=11%, signal=29%	CD300A/HLX/GATA3/ADA/NCKAP1L/CD86/SYK/SASH3/EBI3/ITPKB/HLA-E/CCL19/LGALS9/CD83/CCR2/BCL6/SMAD7/ANXA1/IL18/TGFBR2
GO:0050672	GO:0050672	negative regulation of lymphocyte proliferation	62	0.568547176	1.780277887	0.001647446	0.030113569	0.025636496	841	tags=24%, list=8%, signal=22%	LYN/CD300A/LST1/IDO1/MNDA/PTPN6/LILRB2/CD86/PELI1/LRRC32/BTK/LGALS9/TNFRSF21/INPP5D/CASP3
GO:0050764	GO:0050764	regulation of phagocytosis	62	0.757787203	2.37284056	0.001647446	0.030113569	0.025636496	834	tags=35%, list=8%, signal=33%	HCK/FCER1G/CD36/PYCARD/DOCK2/TLR2/CD300A/PTX3/PPARG/FGR/NCKAP1L/MERTK/SYK/SYT11/RAP1A/C3/MFGE8/PTEN/CSK/CCL2/C2/ATG3
GO:1903557	GO:1903557	positive regulation of tumor necrosis factor superfamily cytokine production	61	0.731748699	2.298627993	0.001647446	0.030113569	0.025636496	1057	tags=38%, list=10%, signal=34%	FCER1G/CD36/CD14/IFIH1/LY96/PYCARD/TLR2/CYBB/DDX58/TLR1/CD86/SASH3/HLA-E/TWIST1/CCL19/LGALS9/SPON2/CCR2/NOD2/PF4/HDAC2/TLR4/FADD
GO:0032963	GO:0032963	collagen metabolic process	92	0.503344085	1.659179974	0.001650165	0.030113569	0.025636496	968	tags=18%, list=9%, signal=17%	COL1A2/COL6A3/CTSS/COL3A1/PPARG/COL4A1/COL4A2/COL15A1/COL5A2/CTSK/RAP1A/FAP/SERPINH1/HDAC2/ENG/MMP2/CTSB
GO:0042107	GO:0042107	cytokine metabolic process	92	0.497711746	1.640614019	0.001650165	0.030113569	0.025636496	1334	tags=22%, list=12%, signal=19%	IRF7/CYBB/NMI/TLR1/GATA3/HMOX1/CD86/SYK/EBI3/CEBPG/LTB/UBE2J1/TLR7/CCR2/INPP5D/TIA1/TLR4/IL18/TLR3/CCL20
GO:0002698	GO:0002698	negative regulation of immune effector process	91	0.542990896	1.785799788	0.001652893	0.030113569	0.025636496	1140	tags=25%, list=10%, signal=23%	PTPRC/IFIT1/CD300A/HLX/A2M/MICB/HMOX1/PTPN6/IL13RA2/DHX58/HLA-E/ANGPT1/RNF125/LGALS9/SERPING1/RPS19/CCR2/BCL6/C1QBP/SMAD7/ANXA1/IL7R/ARRB2
GO:0019079	GO:0019079	viral genome replication	91	0.720365361	2.369152628	0.001652893	0.030113569	0.025636496	816	tags=29%, list=7%, signal=27%	MX1/RSAD2/ISG15/ISG20/OAS3/OAS2/OAS1/APOBEC3A/IFIT1/IFITM1/IFI16/PLSCR1/CCL5/EIF2AK2/OASL/LTF/APOBEC3G/IFITM3/IFIT5/ADAR/C19orf66/CNOT7/STOM/PKN2/CCL2/DEK
GO:0032635	GO:0032635	interleukin-6 production	91	0.635975417	2.09160922	0.001652893	0.030113569	0.025636496	1140	tags=25%, list=10%, signal=23%	FCER1G/CD36/IFIH1/PYCARD/TLR2/DDX58/TLR1/NCKAP1L/MYD88/HYAL2/LILRB2/SYT11/TWIST1/LGALS9/SPON2/TLR7/CSK/NOD2/INPP5D/LILRA2/TLR4/IL18/ARRB2
GO:0042089	GO:0042089	cytokine biosynthetic process	91	0.499345114	1.64225663	0.001652893	0.030113569	0.025636496	1334	tags=22%, list=12%, signal=19%	IRF7/CYBB/NMI/TLR1/GATA3/HMOX1/CD86/SYK/EBI3/CEBPG/LTB/UBE2J1/TLR7/CCR2/INPP5D/TIA1/TLR4/IL18/TLR3/CCL20
GO:0070613	GO:0070613	regulation of protein processing	91	0.519622367	1.70894488	0.001652893	0.030113569	0.025636496	951	tags=25%, list=9%, signal=23%	C1QA/C1QB/C3AR1/A2M/C5AR1/CFP/CFH/IGKV3-20/IGLV2-14/CFB/IGHV3-23/IGLV1-40/CTSZ/C3/CARD8/SERPING1/IGKC/BIRC3/PROS1/C2/IGKV4-1/C1QBP/SERPINE2
GO:1903317	GO:1903317	regulation of protein maturation	93	0.525393346	1.732488346	0.001652893	0.030113569	0.025636496	951	tags=26%, list=9%, signal=24%	C1QA/C1QB/C3AR1/A2M/C5AR1/CFP/CFH/IGKV3-20/IGLV2-14/CFB/IGHV3-23/IGLV1-40/CTSZ/C3/SOX4/CARD8/SERPING1/IGKC/BIRC3/PROS1/C2/IGKV4-1/C1QBP/SERPINE2
GO:0001776	GO:0001776	leukocyte homeostasis	66	0.54469476	1.720832617	0.001655629	0.030113569	0.025636496	1373	tags=35%, list=13%, signal=31%	FCER1G/LYN/CORO1A/ADA/DOCK10/NCKAP1L/MERTK/ITPKB/MEF2C/LGALS9/PPP2R3C/CCR2/CD74/BAK1/CASP3/LAT/FADD/ANXA1/BAX/GPR183/TNFSF14/CCNB2/TNFRSF17
GO:0045582	GO:0045582	positive regulation of T cell differentiation	66	0.546022684	1.725027876	0.001655629	0.030113569	0.025636496	1251	tags=33%, list=11%, signal=30%	HLX/GATA3/ADA/NCKAP1L/LILRB2/CD86/SYK/SASH3/ITPKB/CCL19/LGALS9/CD83/CD74/CD27/LILRB4/BCL6/ANXA1/HLA-G/IL7R/IL18/TGFBR2/CYLD
GO:0070664	GO:0070664	negative regulation of leukocyte proliferation	66	0.567778648	1.793760633	0.001655629	0.030113569	0.025636496	841	tags=24%, list=8%, signal=23%	LYN/CD300A/LST1/IDO1/MNDA/PTPN6/LILRB2/CD86/CCL8/PELI1/LRRC32/BTK/LGALS9/TNFRSF21/INPP5D/CASP3
GO:0071674	GO:0071674	mononuclear cell migration	64	0.566309868	1.776887628	0.001658375	0.030113569	0.025636496	912	tags=27%, list=8%, signal=24%	C3AR1/LYN/CCR1/CCL4/PLA2G7/PDGFD/CCL5/C5AR1/CCL8/CXCL12/CXCL10/CCL19/RPS19/CCR2/CCL2/CCL21/CCL18
GO:1903901	GO:1903901	negative regulation of viral life cycle	64	0.832628492	2.612504829	0.001658375	0.030113569	0.025636496	470	tags=41%, list=4%, signal=39%	MX1/RSAD2/ISG15/ISG20/OAS3/OAS2/FCN1/OAS1/APOBEC3A/IFIT1/IFITM1/IFI16/PLSCR1/PTX3/CCL5/EIF2AK2/OASL/LTF/APOBEC3G/TRIM21/IFITM3/IFIT5/ADAR/TRIM5/C19orf66/FCN3
GO:0002504	GO:0002504	antigen processing and presentation of peptide or polysaccharide antigen via MHC class II	85	0.570098753	1.860115792	0.00166113	0.030113569	0.025636496	737	tags=21%, list=7%, signal=20%	IFI30/FCER1G/PYCARD/CTSS/HLA-DQB1/HLA-DPA1/HLA-DQA1/HLA-DPB1/HLA-DMB/CAPZA1/HLA-DRA/TREM2/HLA-DRB1/HLA-DMA/AP1S2/LGMN/SEC24D/CD74
GO:0060333	GO:0060333	interferon-gamma-mediated signaling pathway	74	0.784931709	2.513460366	0.00166113	0.030113569	0.025636496	1414	tags=54%, list=13%, signal=47%	OAS3/OAS2/HCK/IFI30/OAS1/HLA-DQB1/GBP2/IRF7/NMI/GBP1/HLA-DPA1/TRIM22/HLA-DQA1/PPARG/IRF8/CD44/HLA-DPB1/OASL/TRIM21/STAT1/HLA-DRA/HLA-DRB1/TRIM5/TRIM38/HLA-E/SP100/IRF9/HLA-F/HLA-B/HLA-A/CDC37/VCAM1/MID1/HLA-G/IFNGR1/IFNGR2/SUMO1/HLA-DQB2/B2M/HLA-C
GO:0002474	GO:0002474	antigen processing and presentation of peptide antigen via MHC class I	86	0.647359515	2.120683937	0.001663894	0.030113569	0.025636496	1785	tags=45%, list=16%, signal=38%	IFI30/FCER1G/CD36/NCF2/CYBB/PSMB9/NCF4/PSME2/TAP1/HLA-E/PSMB8/PSMC2/PSMA7/HLA-F/HLA-B/PSME1/SEC24D/HLA-A/MR1/PSMA3/PSMD7/PSMD14/PSMA5/PSMA6/HLA-G/TAP2/PSMC6/ERAP1/IKBKB/B2M/HLA-C/PSMB4/PSMC4/PSMA4/PSMB2/PSME4/PSMD11/PSMB10/SAR1B
GO:0002705	GO:0002705	positive regulation of leukocyte mediated immunity	86	0.539487912	1.767307538	0.001663894	0.030113569	0.025636496	1057	tags=21%, list=10%, signal=19%	RSAD2/ITGB2/FCER1G/ITGAM/GATA3/FGR/SYK/SASH3/HLA-E/VAV1/BTK/C3/GYPC/NOD2/CD40/CRTAM/FAM49B/FADD
GO:0031294	GO:0031294	lymphocyte costimulation	63	0.644440291	2.016712093	0.001663894	0.030113569	0.025636496	1346	tags=38%, list=12%, signal=34%	LYN/HLA-DQB1/HLA-DPA1/HLA-DQA1/HLA-DPB1/PTPN6/HLA-DRA/CD3D/HLA-DRB1/CD86/VAV1/TRBC1/CCL19/CD247/LCK/CSK/GRB2/CCL21/LGALS1/CAV1/TNFRSF14/HLA-DQB2/MAP3K8/TNFSF14
GO:1903305	GO:1903305	regulation of regulated secretory pathway	86	0.564440243	1.849048835	0.001663894	0.030113569	0.025636496	1061	tags=21%, list=10%, signal=19%	ITGB2/FCER1G/LYN/CD300A/RAC2/ITGAM/FGR/HMOX1/IL13RA2/SYK/SYT11/RAP1A/LGALS9/CCR2/MICAL1/FES/C12orf4/TRIM9
GO:0002495	GO:0002495	antigen processing and presentation of peptide antigen via MHC class II	84	0.579888735	1.891354777	0.001666667	0.030113569	0.025636496	737	tags=21%, list=7%, signal=20%	IFI30/FCER1G/PYCARD/CTSS/HLA-DQB1/HLA-DPA1/HLA-DQA1/HLA-DPB1/HLA-DMB/CAPZA1/HLA-DRA/TREM2/HLA-DRB1/HLA-DMA/AP1S2/LGMN/SEC24D/CD74
GO:0007229	GO:0007229	integrin-mediated signaling pathway	84	0.523049939	1.705970371	0.001666667	0.030113569	0.025636496	983	tags=23%, list=9%, signal=21%	TYROBP/ITGB2/HCK/FCER1G/COL3A1/PLEK/ITGAM/FGR/ITGA8/ADAMTS1/SYK/NRP1/VAV1/TIMP1/ADAM10/EMP2/THY1/LAT/ITGAL
GO:1902750	GO:1902750	negative regulation of cell cycle G2/M phase transition	84	0.532165538	1.735701645	0.001666667	0.030113569	0.025636496	2423	tags=48%, list=22%, signal=37%	PSMB9/PSME2/FOXN3/PSMB8/H2AFY/PSMC2/PSMA7/DTL/RBX1/PSME1/PSMA3/PSMD7/PSMD14/PSMA5/AURKA/PSMA6/AURKB/PSMC6/TAOK3/NBN/PSMB4/PSMC4/PSMA4/PSMB2/PSME4/PSMD11/PSMB10/TOPBP1/BRCC3/CDK5RAP3/FANCI/PSMB5/UIMC1/PSMD4/PSMD12/PSMD10/PSMD13/DONSON/ATF5/PSMD1
GO:0001909	GO:0001909	leukocyte mediated cytotoxicity	73	0.53342609	1.700980522	0.001669449	0.030113569	0.025636496	1917	tags=37%, list=17%, signal=31%	PTPRC/CORO1A/MICB/PTPN6/GZMB/CEBPG/HLA-E/VAV1/LGALS9/GYPC/CRTAM/EMP2/FAM49B/FADD/DNASE1L3/IL7R/IL18/ARRB2/SLAMF7/B2M/FCGR2B/RAB27A/LYST/IL12A/KLRK1/CADM1/NCR3
GO:0002286	GO:0002286	T cell activation involved in immune response	75	0.516614833	1.661204145	0.001669449	0.030113569	0.025636496	1482	tags=25%, list=13%, signal=22%	FCER1G/LCP1/HLX/GATA3/HLA-DMB/CD86/CCL19/LGALS9/BCL6/ITGAL/SMAD7/IL18R1/ANXA1/IL18/GPR183/BATF/SLC11A1/TBX21/FCGR2B
GO:0006919	GO:0006919	activation of cysteine-type endopeptidase activity involved in apoptotic process	75	0.531397058	1.708737222	0.001669449	0.030113569	0.025636496	1708	tags=37%, list=16%, signal=32%	IFI27/PYCARD/CASP1/PPARG/BID/TNFSF10/CASP4/S100A8/CASP7/LCK/CARD8/CFLAR/BAK1/FAS/CASP3/RPS27L/CASP8/FADD/BAX/ANP32B/VCP/TNFRSF10B/HSPE1/CYCS/PMAIP1/PDCD2/NLRP1/S100A9
GO:0010972	GO:0010972	negative regulation of G2/M transition of mitotic cell cycle	75	0.519180089	1.669452869	0.001669449	0.030113569	0.025636496	2423	tags=47%, list=22%, signal=37%	PSMB9/PSME2/FOXN3/PSMB8/PSMC2/PSMA7/RBX1/PSME1/PSMA3/PSMD7/PSMD14/PSMA5/AURKA/PSMA6/AURKB/PSMC6/TAOK3/NBN/PSMB4/PSMC4/PSMA4/PSMB2/PSME4/PSMD11/PSMB10/TOPBP1/CDK5RAP3/FANCI/PSMB5/PSMD4/PSMD12/PSMD10/PSMD13/DONSON/PSMD1
GO:0019886	GO:0019886	antigen processing and presentation of exogenous peptide antigen via MHC class II	82	0.54702919	1.777218586	0.001669449	0.030113569	0.025636496	737	tags=20%, list=7%, signal=18%	IFI30/FCER1G/CTSS/HLA-DQB1/HLA-DPA1/HLA-DQA1/HLA-DPB1/HLA-DMB/CAPZA1/HLA-DRA/HLA-DRB1/HLA-DMA/AP1S2/LGMN/SEC24D/CD74
GO:0032675	GO:0032675	regulation of interleukin-6 production	82	0.655181069	2.128588373	0.001669449	0.030113569	0.025636496	823	tags=23%, list=7%, signal=22%	FCER1G/CD36/IFIH1/PYCARD/TLR2/DDX58/TLR1/NCKAP1L/MYD88/HYAL2/LILRB2/SYT11/TWIST1/LGALS9/SPON2/TLR7/CSK/NOD2/INPP5D
GO:0042100	GO:0042100	B cell proliferation	73	0.598814669	1.909490568	0.001669449	0.030113569	0.025636496	1136	tags=32%, list=10%, signal=28%	PTPRC/LYN/CD300A/MNDA/ADA/NCKAP1L/SASH3/CD38/PELI1/MEF2C/BTK/CD74/AHR/TNFRSF21/CD40/TNFRSF4/INPP5D/CASP3/BCL6/TLR4/BAX/IL7R/GPR183
GO:0042102	GO:0042102	positive regulation of T cell proliferation	75	0.608486712	1.956623355	0.001669449	0.030113569	0.025636496	1195	tags=32%, list=11%, signal=29%	PTPRC/PYCARD/CORO1A/HLA-DPA1/HLA-DPB1/CCL5/NCKAP1L/HLA-DMB/LILRB2/CD86/SYK/SASH3/EBI3/HLA-E/CCL19/LGALS9/CCR2/NCK1/VCAM1/IL6ST/FADD/ANXA1/IL18/TGFBR2
GO:0046632	GO:0046632	alpha-beta T cell differentiation	75	0.570453266	1.834324664	0.001669449	0.030113569	0.025636496	1417	tags=31%, list=13%, signal=27%	RSAD2/HLX/GATA3/ADA/NCKAP1L/CD86/SYK/SASH3/ITPKB/CCL19/GPR18/LGALS9/CD83/SATB1/BCL6/SMAD7/IL18R1/ANXA1/IL18/GPR183/TGFBR2/BATF/TBX21
GO:0060337	GO:0060337	type I interferon signaling pathway	75	0.80478402	2.587828423	0.001669449	0.030113569	0.025636496	827	tags=48%, list=8%, signal=45%	MX1/RSAD2/IFI6/ISG15/MX2/ISG20/OAS3/OAS2/XAF1/OAS1/IFI27/IFIT1/IFIT3/GBP2/IRF7/IFITM1/IFIT2/IRF8/OASL/SAMHD1/MYD88/PTPN6/IFITM3/STAT1/IFI35/ADAR/HLA-E/CNOT7/PSMB8/SP100/IRF9/HLA-F/HLA-B/HLA-A/IFNAR1/CDC37
GO:0071357	GO:0071357	cellular response to type I interferon	75	0.80478402	2.587828423	0.001669449	0.030113569	0.025636496	827	tags=48%, list=8%, signal=45%	MX1/RSAD2/IFI6/ISG15/MX2/ISG20/OAS3/OAS2/XAF1/OAS1/IFI27/IFIT1/IFIT3/GBP2/IRF7/IFITM1/IFIT2/IRF8/OASL/SAMHD1/MYD88/PTPN6/IFITM3/STAT1/IFI35/ADAR/HLA-E/CNOT7/PSMB8/SP100/IRF9/HLA-F/HLA-B/HLA-A/IFNAR1/CDC37
GO:0071887	GO:0071887	leukocyte apoptotic process	82	0.60423347	1.963067004	0.001669449	0.030113569	0.025636496	1180	tags=33%, list=11%, signal=30%	FCER1G/LYN/HCLS1/IRF7/IDO1/CCL5/ADA/MERTK/ITPKB/CCR5/CXCL12/MEF2C/CCL19/BTK/LGALS9/PTEN/CD74/NOD2/CD27/BAK1/TNFRSF21/CCL21/BCL6/FADD/ANXA1/BAX/AURKB
GO:0032481	GO:0032481	positive regulation of type I interferon production	60	0.627401818	1.961396075	0.001672241	0.030113569	0.025636496	1623	tags=33%, list=15%, signal=29%	CD14/IFIH1/TLR2/IRF7/DDX58/IFI16/MYD88/STAT1/SYK/DHX58/DDX41/TLR7/POLR2F/TLR4/LRRFIP1/TLR3/TICAM1/IRAK1/HMGB2/POLR2K
GO:0032649	GO:0032649	regulation of interferon-gamma production	71	0.613511053	1.949923993	0.001672241	0.030113569	0.025636496	1454	tags=34%, list=13%, signal=30%	ISG15/CD14/PYCARD/HLA-DPA1/IRF8/HLA-DPB1/GATA3/SASH3/EBI3/CEBPG/LGALS9/TLR7/CCR2/C1QBP/FAM49B/TLR4/IL18R1/FADD/IL18/CD2/TLR3/SLC11A1/CD244/IL1B
GO:0002456	GO:0002456	T cell mediated immunity	68	0.534220871	1.689990546	0.001675042	0.030113569	0.025636496	1482	tags=32%, list=13%, signal=28%	RSAD2/PTPRC/BTN3A3/BTN3A2/GATA3/MICB/SASH3/HLA-E/RFTN1/CD8A/EMP2/FAM49B/SMAD7/JAG1/FADD/IL7R/IL18/SLC11A1/B2M/TBX21/IL1B/FCGR2B
GO:0002479	GO:0002479	antigen processing and presentation of exogenous peptide antigen via MHC class I, TAP-dependent	67	0.666918303	2.105187038	0.001675042	0.030113569	0.025636496	1769	tags=49%, list=16%, signal=42%	CD36/NCF2/CYBB/PSMB9/NCF4/PSME2/TAP1/HLA-E/PSMB8/PSMC2/PSMA7/HLA-F/HLA-B/PSME1/HLA-A/PSMA3/PSMD7/PSMD14/PSMA5/PSMA6/HLA-G/TAP2/PSMC6/IKBKB/B2M/HLA-C/PSMB4/PSMC4/PSMA4/PSMB2/PSME4/PSMD11/PSMB10
GO:0002821	GO:0002821	positive regulation of adaptive immune response	68	0.585830896	1.853257201	0.001675042	0.030113569	0.025636496	1454	tags=31%, list=13%, signal=27%	RSAD2/FCER1G/PYCARD/HLX/GATA3/ADA/SASH3/HLA-E/CCL19/BTK/C3/CCR2/CD40/IL6ST/FAM49B/FADD/ANXA1/SLC11A1/B2M/TBX21/IL1B
GO:0002824	GO:0002824	positive regulation of adaptive immune response based on somatic recombination of immune receptors built from immunoglobulin superfamily domains	65	0.567367464	1.784819257	0.001675042	0.030113569	0.025636496	1454	tags=29%, list=13%, signal=26%	RSAD2/FCER1G/HLX/GATA3/ADA/SASH3/HLA-E/CCL19/BTK/C3/CCR2/CD40/FAM49B/FADD/ANXA1/SLC11A1/B2M/TBX21/IL1B
GO:0002920	GO:0002920	regulation of humoral immune response	67	0.613020132	1.935052658	0.001675042	0.030113569	0.025636496	933	tags=31%, list=8%, signal=29%	C1QA/C1QB/C3AR1/A2M/PTPN6/C5AR1/CFP/CFH/IGKV3-20/IGLV2-14/CFB/IGHV3-23/IGLV1-40/C3/SERPING1/IGKC/PPP2R3C/PROS1/C2/IGKV4-1/C1QBP
GO:0031100	GO:0031100	animal organ regeneration	67	0.534660874	1.68770468	0.001675042	0.030113569	0.025636496	1618	tags=33%, list=15%, signal=28%	LCP1/CCND1/PPARG/NNMT/TYMS/UCP2/HMOX1/C5AR1/RAP1A/CXCL12/EZH2/BAK1/ANGPT2/AURKA/TGFBR2/PGF/CDK4/PCNA/IGF2R/MED1/ANXA3/UPF2
GO:0031145	GO:0031145	anaphase-promoting complex-dependent catabolic process	65	0.598976229	1.884253816	0.001675042	0.030113569	0.025636496	2423	tags=58%, list=22%, signal=46%	PSMB9/PSME2/PSMB8/PTTG1/PSMC2/PSMA7/CDC20/UBE2E1/PSME1/PSMA3/UBE2C/PSMD7/PSMD14/PSMA5/AURKA/PSMA6/AURKB/PSMC6/ANAPC10/UBE2D1/BUB3/PSMB4/PSMC4/PSMA4/PSMB2/CCNB1/PSME4/PSMD11/BUB1B/PSMB10/CDC23/MAD2L1/PSMB5/PSMD4/PSMD12/PSMD10/PSMD13/PSMD1
GO:0070098	GO:0070098	chemokine-mediated signaling pathway	67	0.626269429	1.976875245	0.001675042	0.030113569	0.025636496	912	tags=27%, list=8%, signal=25%	CX3CR1/CCR1/CCL4/CXCR4/CCRL2/CCL5/TREM2/CCL8/CCR5/CXCL12/CXCL10/CCL19/CCR2/CCL2/PF4/CCL21/SLIT3/CCL18
GO:2000106	GO:2000106	regulation of leukocyte apoptotic process	65	0.632096956	1.98844469	0.001675042	0.030113569	0.025636496	1180	tags=38%, list=11%, signal=35%	FCER1G/LYN/HCLS1/IRF7/IDO1/CCL5/ADA/MERTK/ITPKB/CCR5/CXCL12/MEF2C/CCL19/BTK/LGALS9/PTEN/CD74/NOD2/CD27/CCL21/BCL6/FADD/ANXA1/BAX/AURKB
GO:0002455	GO:0002455	humoral immune response mediated by circulating immunoglobulin	59	0.627264043	1.959374399	0.001677852	0.030113569	0.025636496	1271	tags=34%, list=12%, signal=30%	C1QA/C1QB/HLA-DQB1/IGHM/IGHA1/PTPN6/IGKV3-20/IGLV2-14/TRBC1/IGHV3-23/IGLV1-40/C3/SERPING1/IGKC/C2/IGKV4-1/C1QBP/IGHV1-69/IGHV3-9/TRDC
GO:0032637	GO:0032637	interleukin-8 production	59	0.606390236	1.89417123	0.001677852	0.030113569	0.025636496	1454	tags=36%, list=13%, signal=31%	FCN1/CD14/PYCARD/TLR2/DDX58/TLR1/HYAL2/CD58/LGALS9/PRKD2/ANXA4/TLR7/NOD2/LILRA2/TLR4/FADD/ANXA1/CD2/TLR3/CD244/IL1B
GO:0048525	GO:0048525	negative regulation of viral process	78	0.802651157	2.585844756	0.001677852	0.030113569	0.025636496	471	tags=37%, list=4%, signal=36%	MX1/RSAD2/ISG15/ISG20/OAS3/OAS2/FCN1/OAS1/APOBEC3A/IFIT1/IFITM1/CCL4/IFI16/PLSCR1/PTX3/CCL5/EIF2AK2/OASL/LTF/APOBEC3G/TRIM21/IFITM3/STAT1/IFIT5/ADAR/TRIM5/C19orf66/FCN3/TRIM14
GO:0034340	GO:0034340	response to type I interferon	79	0.803173445	2.590977562	0.001680672	0.030113569	0.025636496	827	tags=47%, list=8%, signal=44%	MX1/RSAD2/IFI6/ISG15/MX2/ISG20/OAS3/OAS2/XAF1/OAS1/IFI27/IFIT1/IFIT3/GBP2/IRF7/IFITM1/IFIT2/IRF8/OASL/SAMHD1/MYD88/PTPN6/IFITM3/STAT1/IFI35/ADAR/HLA-E/C19orf66/CNOT7/PSMB8/SP100/IRF9/HLA-F/HLA-B/HLA-A/IFNAR1/CDC37
GO:0038094	GO:0038094	Fc-gamma receptor signaling pathway	79	0.618644372	1.995700554	0.001680672	0.030113569	0.025636496	1264	tags=33%, list=12%, signal=29%	HCK/FCER1G/LYN/ARPC1B/FGR/NCKAP1L/SYK/IGKV3-20/IGLV2-14/ARPC2/VAV1/RAP1A/IGHV3-23/CD247/IGLV1-40/WIPF1/IGKC/GRB2/NCK1/ACTR3/IGKV4-1/MYO10/CYFIP1/FCGRT/IGHV1-69/IGHV3-9
GO:0002367	GO:0002367	cytokine production involved in immune response	76	0.547555786	1.756995515	0.001683502	0.030113569	0.025636496	1499	tags=30%, list=14%, signal=26%	RSAD2/FCER1G/CD36/TLR2/GATA3/HMOX1/SASH3/BTK/ANGPT1/SPON2/CD74/NOD2/MR1/GPRC5B/BCL6/SMAD7/TLR4/IL18/TLR3/SLC11A1/B2M/TBX21/HK1
GO:0002431	GO:0002431	Fc receptor mediated stimulatory signaling pathway	81	0.622378014	2.013112955	0.001683502	0.030113569	0.025636496	1264	tags=33%, list=12%, signal=30%	HCK/FCER1G/LYN/PLSCR1/ARPC1B/FGR/NCKAP1L/SYK/IGKV3-20/IGLV2-14/ARPC2/VAV1/RAP1A/IGHV3-23/CD247/IGLV1-40/WIPF1/CSK/IGKC/GRB2/NCK1/ACTR3/IGKV4-1/MYO10/CYFIP1/IGHV1-69/IGHV3-9
GO:0002433	GO:0002433	immune response-regulating cell surface receptor signaling pathway involved in phagocytosis	76	0.593738552	1.905186647	0.001683502	0.030113569	0.025636496	1264	tags=32%, list=12%, signal=28%	HCK/LYN/ARPC1B/FGR/NCKAP1L/SYK/IGKV3-20/IGLV2-14/ARPC2/VAV1/RAP1A/IGHV3-23/CD247/IGLV1-40/WIPF1/IGKC/GRB2/NCK1/ACTR3/IGKV4-1/MYO10/CYFIP1/IGHV1-69/IGHV3-9
GO:0006956	GO:0006956	complement activation	76	0.68520983	2.198699434	0.001683502	0.030113569	0.025636496	933	tags=34%, list=8%, signal=32%	C1QA/C1QB/C3AR1/FCN1/VSIG4/IGHM/CFD/A2M/IGHA1/C5AR1/CFP/CFH/IGKV3-20/IGLV2-14/CFB/TRBC1/IGHV3-23/IGLV1-40/FCN3/C3/SERPING1/IGKC/PROS1/C2/IGKV4-1/C1QBP
GO:0030593	GO:0030593	neutrophil chemotaxis	72	0.574512052	1.823669802	0.001683502	0.030113569	0.025636496	933	tags=28%, list=8%, signal=26%	ITGB2/C3AR1/FCER1G/CCL4/RAC2/CCL5/NCKAP1L/C5AR1/SYK/CKLF/CCL8/S100A8/VAV1/CCL19/CCL2/CD74/PF4/CCL21/CCL18/C1QBP
GO:0032609	GO:0032609	interferon-gamma production	81	0.610250147	1.973884761	0.001683502	0.030113569	0.025636496	1454	tags=32%, list=13%, signal=28%	ISG15/CD14/PYCARD/HLA-DPA1/IRF8/BTN3A2/HLA-DPB1/GATA3/SASH3/EBI3/CEBPG/LGALS9/TLR7/CCR2/BTN3A1/C1QBP/FAM49B/TLR4/IL18R1/FADD/IL18/CD2/TLR3/SLC11A1/CD244/IL1B
GO:0038096	GO:0038096	Fc-gamma receptor signaling pathway involved in phagocytosis	76	0.593738552	1.905186647	0.001683502	0.030113569	0.025636496	1264	tags=32%, list=12%, signal=28%	HCK/LYN/ARPC1B/FGR/NCKAP1L/SYK/IGKV3-20/IGLV2-14/ARPC2/VAV1/RAP1A/IGHV3-23/CD247/IGLV1-40/WIPF1/IGKC/GRB2/NCK1/ACTR3/IGKV4-1/MYO10/CYFIP1/IGHV1-69/IGHV3-9
GO:0045621	GO:0045621	positive regulation of lymphocyte differentiation	76	0.549299478	1.762590667	0.001683502	0.030113569	0.025636496	1251	tags=33%, list=11%, signal=29%	HLX/GATA3/ADA/NCKAP1L/LILRB2/CD86/SYK/SASH3/ITPKB/CCL19/BTK/LGALS9/CD83/PPP2R3C/CD74/CD27/INPP5D/LILRB4/BCL6/ANXA1/HLA-G/IL7R/IL18/TGFBR2/CYLD
GO:1990266	GO:1990266	neutrophil migration	81	0.51603133	1.669129265	0.001683502	0.030113569	0.025636496	933	tags=26%, list=8%, signal=24%	ITGB2/C3AR1/FCER1G/CCL4/RAC2/CCL5/PECAM1/NCKAP1L/C5AR1/SYK/CKLF/CCL8/S100A8/VAV1/CCL19/CCL2/CD74/PF4/CCL21/CCL18/C1QBP
GO:0032760	GO:0032760	positive regulation of tumor necrosis factor production	58	0.731652188	2.277501305	0.001689189	0.030113569	0.025636496	1057	tags=38%, list=10%, signal=34%	FCER1G/CD36/CD14/IFIH1/LY96/PYCARD/TLR2/CYBB/DDX58/TLR1/SASH3/HLA-E/TWIST1/CCL19/LGALS9/SPON2/CCR2/NOD2/PF4/HDAC2/TLR4/FADD
GO:0042590	GO:0042590	antigen processing and presentation of exogenous peptide antigen via MHC class I	70	0.69164007	2.192637873	0.001689189	0.030113569	0.025636496	1769	tags=50%, list=16%, signal=42%	IFI30/FCER1G/CD36/NCF2/CYBB/PSMB9/NCF4/PSME2/TAP1/HLA-E/PSMB8/PSMC2/PSMA7/HLA-F/HLA-B/PSME1/HLA-A/PSMA3/PSMD7/PSMD14/PSMA5/PSMA6/HLA-G/TAP2/PSMC6/IKBKB/B2M/HLA-C/PSMB4/PSMC4/PSMA4/PSMB2/PSME4/PSMD11/PSMB10
GO:0045069	GO:0045069	regulation of viral genome replication	70	0.776462693	2.461542616	0.001689189	0.030113569	0.025636496	413	tags=31%, list=4%, signal=30%	MX1/RSAD2/ISG15/ISG20/OAS3/OAS2/OAS1/APOBEC3A/IFIT1/IFITM1/IFI16/PLSCR1/CCL5/EIF2AK2/OASL/LTF/APOBEC3G/IFITM3/IFIT5/ADAR/C19orf66/CNOT7
GO:0050871	GO:0050871	positive regulation of B cell activation	70	0.592465886	1.8782358	0.001689189	0.030113569	0.025636496	1136	tags=36%, list=10%, signal=32%	PTPRC/IGHM/ADA/NCKAP1L/IGHA1/SYK/SASH3/CD38/PELI1/TRBC1/MEF2C/IGHV3-23/BTK/IGKC/PPP2R3C/CD74/NOD2/CD27/CD40/TNFRSF4/INPP5D/TNIP2/BCL6/TLR4/GPR183
GO:0072676	GO:0072676	lymphocyte migration	70	0.536271991	1.700089873	0.001689189	0.030113569	0.025636496	1904	tags=46%, list=17%, signal=38%	PYCARD/CCL4/CCL5/GATA3/STK10/CKLF/CCL8/S1PR1/CXCL12/CXCL10/CCL19/CCR2/CCL2/MSN/ADAM10/CCL21/CCL18/APP/ECM1/FADD/GPR183/ITGA4/CCL20/TNFSF14/TBX21/CX3CL1/ITGB7/CXCL13/CCL7/ZAP70/RHOA/KLRK1
GO:0030574	GO:0030574	collagen catabolic process	57	0.591777459	1.839598213	0.001692047	0.030113569	0.025636496	1709	tags=32%, list=16%, signal=27%	COL1A2/COL6A3/CTSS/COL3A1/COL4A1/COL4A2/COL15A1/COL5A2/CTSK/FAP/MMP2/CTSB/COL6A2/MMP1/MMP7/MMP9/ADAMTS3/COL11A1
GO:0030449	GO:0030449	regulation of complement activation	53	0.64921946	1.98718444	0.001697793	0.030113569	0.025636496	933	tags=36%, list=8%, signal=33%	C1QA/C1QB/C3AR1/A2M/C5AR1/CFP/CFH/IGKV3-20/IGLV2-14/CFB/IGHV3-23/IGLV1-40/C3/SERPING1/IGKC/PROS1/C2/IGKV4-1/C1QBP
GO:0050853	GO:0050853	B cell receptor signaling pathway	53	0.800139943	2.449134295	0.001697793	0.030113569	0.025636496	703	tags=45%, list=6%, signal=43%	PTPRC/LYN/CD300A/IGHM/MNDA/LAT2/NCKAP1L/IGHA1/PTPN6/LPXN/SYK/PRKCB/PRKCH/CD38/TRBC1/MEF2C/IGHV3-23/BTK/RFTN1/CBFB/LCK/CD79B/IGKC/PLEKHA1
GO:0032755	GO:0032755	positive regulation of interleukin-6 production	55	0.714440839	2.192488276	0.001712329	0.030113569	0.025636496	752	tags=27%, list=7%, signal=26%	FCER1G/CD36/IFIH1/PYCARD/TLR2/DDX58/TLR1/MYD88/HYAL2/LILRB2/TWIST1/LGALS9/SPON2/TLR7/NOD2
GO:0032677	GO:0032677	regulation of interleukin-8 production	52	0.66070753	2.0121738	0.001715266	0.030113569	0.025636496	1454	tags=38%, list=13%, signal=34%	FCN1/CD14/PYCARD/TLR2/DDX58/TLR1/HYAL2/CD58/LGALS9/PRKD2/ANXA4/TLR7/NOD2/TLR4/FADD/ANXA1/CD2/TLR3/CD244/IL1B
GO:0043367	GO:0043367	CD4-positive, alpha-beta T cell differentiation	54	0.611878452	1.870119798	0.001730104	0.030113569	0.025636496	1417	tags=33%, list=13%, signal=29%	RSAD2/HLX/GATA3/NCKAP1L/CD86/SASH3/CCL19/LGALS9/CD83/SATB1/BCL6/SMAD7/IL18R1/ANXA1/IL18/GPR183/BATF/TBX21
GO:0099024	GO:0099024	plasma membrane invagination	54	0.702495288	2.147077317	0.001730104	0.030113569	0.025636496	680	tags=37%, list=6%, signal=35%	ITGB2/FCER1G/CD36/CD300A/IGHM/PPARG/RAC2/ITGAM/NCKAP1L/IGHA1/TREM2/ARHGAP25/ABCA1/TRBC1/IGHV3-23/RHOG/C3/MFGE8/SCARB2/IGKC
GO:2000257	GO:2000257	regulation of protein activation cascade	54	0.648442099	1.981871405	0.001730104	0.030113569	0.025636496	933	tags=35%, list=8%, signal=32%	C1QA/C1QB/C3AR1/A2M/C5AR1/CFP/CFH/IGKV3-20/IGLV2-14/CFB/IGHV3-23/IGLV1-40/C3/SERPING1/IGKC/PROS1/C2/IGKV4-1/C1QBP
GO:0032757	GO:0032757	positive regulation of interleukin-8 production	39	0.678118446	1.936594824	0.001733102	0.030113569	0.025636496	1454	tags=46%, list=13%, signal=40%	FCN1/CD14/PYCARD/TLR2/DDX58/TLR1/HYAL2/CD58/LGALS9/PRKD2/TLR7/NOD2/TLR4/FADD/CD2/TLR3/CD244/IL1B
GO:0043300	GO:0043300	regulation of leukocyte degranulation	39	0.704309326	2.011391672	0.001733102	0.030113569	0.025636496	947	tags=36%, list=9%, signal=33%	ITGB2/FCER1G/LYN/CD300A/RAC2/ITGAM/FGR/HMOX1/IL13RA2/SYK/LGALS9/CCR2/FES/C12orf4
GO:0045058	GO:0045058	T cell selection	39	0.638507504	1.823472484	0.001733102	0.030113569	0.025636496	1859	tags=36%, list=17%, signal=30%	DOCK2/GATA3/CD3D/SYK/ITPKB/JAG2/CD74/CYLD/BATF/TBX21/BCL11B/CD1D/ZAP70/RHOA
GO:0070265	GO:0070265	necrotic cell death	39	0.683324388	1.95146214	0.001733102	0.030113569	0.025636496	1553	tags=49%, list=14%, signal=42%	CD14/LY96/CASP1/PYGL/CFLAR/BIRC3/TMEM123/FAS/CAV1/CASP8/TLR4/FADD/BAX/RBCK1/MAP3K5/CYLD/TLR3/DNM1L/TICAM1
GO:0002279	GO:0002279	mast cell activation involved in immune response	40	0.674139368	1.93416773	0.001736111	0.030113569	0.025636496	967	tags=35%, list=9%, signal=32%	FCER1G/LYN/CD300A/RAC2/FGR/LAT2/HMOX1/IL13RA2/SYK/BTK/LGALS9/FES/C12orf4/LAT
GO:0043303	GO:0043303	mast cell degranulation	40	0.674139368	1.93416773	0.001736111	0.030113569	0.025636496	967	tags=35%, list=9%, signal=32%	FCER1G/LYN/CD300A/RAC2/FGR/LAT2/HMOX1/IL13RA2/SYK/BTK/LGALS9/FES/C12orf4/LAT
GO:0098586	GO:0098586	cellular response to virus	40	0.641636765	1.840914778	0.001736111	0.030113569	0.025636496	933	tags=28%, list=8%, signal=25%	IFIH1/IRF7/DDX58/DDX60/ADAR/DHX58/CCL19/RNF125/LGALS9/BIRC3/C1QBP
GO:2000107	GO:2000107	negative regulation of leukocyte apoptotic process	40	0.652136539	1.871039592	0.001736111	0.030113569	0.025636496	1180	tags=45%, list=11%, signal=40%	FCER1G/HCLS1/IRF7/IDO1/CCL5/ADA/MERTK/ITPKB/CCR5/CXCL12/CCL19/CD74/NOD2/CD27/CCL21/BCL6/FADD/AURKB
GO:0002886	GO:0002886	regulation of myeloid leukocyte mediated immunity	41	0.697765715	2.004747668	0.001745201	0.030113569	0.025636496	1074	tags=41%, list=10%, signal=38%	ITGB2/FCER1G/LYN/CD300A/RAC2/ITGAM/FGR/HMOX1/IL13RA2/SYK/BTK/C3/LGALS9/CCR2/FES/C12orf4/DNASE1L3
GO:0032480	GO:0032480	negative regulation of type I interferon production	38	0.710133817	2.00643486	0.001754386	0.030113569	0.025636496	525	tags=24%, list=5%, signal=23%	ISG15/HERC5/IFIH1/PYCARD/NMI/DDX58/UBE2L6/DHX58/RNF125
GO:0032608	GO:0032608	interferon-beta production	38	0.683742262	1.931867314	0.001754386	0.030113569	0.025636496	1644	tags=34%, list=15%, signal=29%	IFIH1/PYCARD/TLR2/IRF7/NMI/DDX58/TLR7/TLR4/YY1/TLR3/TICAM1/HMGB2/REL
GO:0032648	GO:0032648	regulation of interferon-beta production	38	0.683742262	1.931867314	0.001754386	0.030113569	0.025636496	1644	tags=34%, list=15%, signal=29%	IFIH1/PYCARD/TLR2/IRF7/NMI/DDX58/TLR7/TLR4/YY1/TLR3/TICAM1/HMGB2/REL
GO:0061515	GO:0061515	myeloid cell development	51	0.617759483	1.865104969	0.001754386	0.030113569	0.025636496	1484	tags=31%, list=14%, signal=27%	TYROBP/EVI2B/TLR2/LTF/NCKAP1L/PTPN6/FBN1/FLI1/TSPAN2/TJP2/BCL6/APP/TMOD3/PIP4K2A/TAL1/MED1
GO:0002448	GO:0002448	mast cell mediated immunity	42	0.676553287	1.951502986	0.001760563	0.030113569	0.025636496	967	tags=36%, list=9%, signal=33%	FCER1G/LYN/CD300A/RAC2/FGR/LAT2/HMOX1/IL13RA2/SYK/BTK/LGALS9/SPON2/FES/C12orf4/LAT
GO:0050854	GO:0050854	regulation of antigen receptor-mediated signaling pathway	42	0.689630108	1.989222786	0.001760563	0.030113569	0.025636496	1251	tags=38%, list=11%, signal=34%	PTPRC/LYN/CD300A/GBP1/ADA/PTPN6/LPXN/PRKCB/PRKCH/PRKD2/CBFB/LCK/LILRB4/THY1/PVRIG/CYLD
GO:0032655	GO:0032655	regulation of interleukin-12 production	43	0.656497617	1.90178816	0.001763668	0.030113569	0.025636496	1333	tags=33%, list=12%, signal=29%	CD36/TLR2/IRF8/IDO1/LTB/CCL19/LGALS9/CD40/C1QBP/TLR4/HLA-G/ARRB2/ACP5/TLR3
GO:0050766	GO:0050766	positive regulation of phagocytosis	43	0.706419775	2.046406155	0.001763668	0.030113569	0.025636496	804	tags=30%, list=7%, signal=28%	FCER1G/CD36/PYCARD/DOCK2/PTX3/PPARG/NCKAP1L/MERTK/RAP1A/C3/MFGE8/CCL2/C2
GO:0031663	GO:0031663	lipopolysaccharide-mediated signaling pathway	47	0.660936631	1.946922752	0.001766784	0.030113569	0.025636496	1592	tags=43%, list=14%, signal=37%	HCK/CD14/LYN/LY96/TLR2/LY86/CCL5/LTF/TRIM5/SCARB2/CARD8/CCL2/LILRA2/TLR4/IL18/CD180/IL1B/NOS3/TICAM1/IRAK1
GO:0006958	GO:0006958	complement activation, classical pathway	49	0.627507969	1.874018629	0.00177305	0.030113569	0.025636496	1271	tags=37%, list=12%, signal=33%	C1QA/C1QB/IGHM/IGHA1/IGKV3-20/IGLV2-14/TRBC1/IGHV3-23/IGLV1-40/C3/SERPING1/IGKC/C2/IGKV4-1/C1QBP/IGHV1-69/IGHV3-9/TRDC
GO:0032615	GO:0032615	interleukin-12 production	45	0.642279347	1.881645601	0.00177305	0.030113569	0.025636496	1333	tags=31%, list=12%, signal=27%	CD36/TLR2/IRF8/IDO1/LTB/CCL19/LGALS9/CD40/C1QBP/TLR4/HLA-G/ARRB2/ACP5/TLR3
GO:0032729	GO:0032729	positive regulation of interferon-gamma production	49	0.641182336	1.914856387	0.00177305	0.030113569	0.025636496	1454	tags=43%, list=13%, signal=37%	CD14/PYCARD/HLA-DPA1/IRF8/HLA-DPB1/SASH3/EBI3/CEBPG/LGALS9/TLR7/CCR2/FAM49B/TLR4/IL18R1/FADD/IL18/CD2/TLR3/SLC11A1/CD244/IL1B
GO:0034121	GO:0034121	regulation of toll-like receptor signaling pathway	44	0.757532733	2.202211666	0.00177305	0.030113569	0.025636496	1140	tags=36%, list=10%, signal=33%	RSAD2/CD36/CD14/LYN/LY96/TLR2/IRF7/CD300A/TLR1/LTF/PELI1/BIRC3/LILRA2/CAV1/TLR4/ARRB2
GO:0038083	GO:0038083	peptidyl-tyrosine autophosphorylation	49	0.618536815	1.847226764	0.00177305	0.030113569	0.025636496	940	tags=27%, list=9%, signal=24%	HCK/LYN/FGR/SLA/SYK/KDR/BTK/LCK/CSK/GRB2/MATK/FES/CAV1
GO:0045071	GO:0045071	negative regulation of viral genome replication	44	0.84888427	2.467778304	0.00177305	0.030113569	0.025636496	412	tags=48%, list=4%, signal=46%	MX1/RSAD2/ISG15/ISG20/OAS3/OAS2/OAS1/APOBEC3A/IFIT1/IFITM1/IFI16/PLSCR1/CCL5/EIF2AK2/OASL/LTF/APOBEC3G/IFITM3/IFIT5/ADAR/C19orf66
GO:0045576	GO:0045576	mast cell activation	48	0.655220629	1.941251238	0.00177305	0.030113569	0.025636496	967	tags=33%, list=9%, signal=31%	FCER1G/LYN/CD300A/PLSCR1/RAC2/LCP2/FGR/LAT2/HMOX1/IL13RA2/SYK/BTK/LGALS9/FES/C12orf4/LAT
GO:0006911	GO:0006911	phagocytosis, engulfment	50	0.718748303	2.156209292	0.001785714	0.030113569	0.025636496	680	tags=40%, list=6%, signal=38%	ITGB2/FCER1G/CD36/CD300A/IGHM/PPARG/RAC2/ITGAM/NCKAP1L/IGHA1/TREM2/ARHGAP25/ABCA1/TRBC1/IGHV3-23/RHOG/C3/MFGE8/SCARB2/IGKC
GO:0006968	GO:0006968	cellular defense response	50	0.659058989	1.977144307	0.001785714	0.030113569	0.025636496	1161	tags=38%, list=11%, signal=34%	TYROBP/CX3CR1/LY96/NCF2/MNDA/LILRB2/C5AR1/CCR5/PRF1/CD300C/GNLY/LGALS3BP/CLEC5A/CCR2/ZNF148/TCIRG1/LSP1/HLA-G/CD5L
GO:0030888	GO:0030888	regulation of B cell proliferation	50	0.659111501	1.977301841	0.001785714	0.030113569	0.025636496	1136	tags=42%, list=10%, signal=38%	PTPRC/LYN/CD300A/MNDA/ADA/NCKAP1L/SASH3/CD38/PELI1/MEF2C/BTK/CD74/AHR/TNFRSF21/CD40/TNFRSF4/INPP5D/CASP3/BCL6/TLR4/GPR183
GO:0050688	GO:0050688	regulation of defense response to virus	50	0.669737991	2.009180784	0.001785714	0.030113569	0.025636496	933	tags=26%, list=8%, signal=24%	HERC5/PYCARD/IFIT1/DDX58/MICB/APOBEC3G/DDX60/STAT1/DHX58/RNF125/BIRC3/AIM2/C1QBP
GO:0032613	GO:0032613	interleukin-10 production	35	0.650277236	1.794894631	0.001792115	0.030113569	0.025636496	1021	tags=31%, list=9%, signal=29%	FCER1G/PYCARD/TLR2/IDO1/SASH3/CD34/LGALS9/CD83/NOD2/TNFRSF21/TLR4
GO:0034123	GO:0034123	positive regulation of toll-like receptor signaling pathway	14	0.810331077	1.882031776	0.001792115	0.030113569	0.025636496	387	tags=36%, list=4%, signal=34%	RSAD2/TLR2/TLR1/LTF/PELI1
GO:2000484	GO:2000484	positive regulation of interleukin-8 secretion	14	0.85553331	1.987016076	0.001792115	0.030113569	0.025636496	544	tags=57%, list=5%, signal=54%	FCN1/CD14/PYCARD/TLR2/TLR1/HYAL2/CD58/LGALS9
GO:0032653	GO:0032653	regulation of interleukin-10 production	33	0.664963539	1.804915307	0.001801802	0.030113569	0.025636496	1021	tags=33%, list=9%, signal=30%	FCER1G/PYCARD/TLR2/IDO1/SASH3/CD34/LGALS9/CD83/NOD2/TNFRSF21/TLR4
GO:0097300	GO:0097300	programmed necrotic cell death	32	0.748654194	2.013388749	0.001808318	0.030113569	0.025636496	1553	tags=56%, list=14%, signal=48%	CD14/LY96/CASP1/PYGL/CFLAR/BIRC3/FAS/CAV1/CASP8/TLR4/FADD/BAX/RBCK1/MAP3K5/CYLD/TLR3/DNM1L/TICAM1
GO:0001773	GO:0001773	myeloid dendritic cell activation	23	0.730599954	1.86695976	0.001814882	0.030113569	0.025636496	1602	tags=43%, list=15%, signal=37%	PYCARD/DOCK2/UBD/TGFBR2/CD2/BATF3/BATF/FLT3LG/RBPJ/SLAMF1
GO:0030889	GO:0030889	negative regulation of B cell proliferation	15	0.795417761	1.866355977	0.001814882	0.030113569	0.025636496	841	tags=47%, list=8%, signal=43%	LYN/CD300A/MNDA/BTK/TNFRSF21/INPP5D/CASP3
GO:0033006	GO:0033006	regulation of mast cell activation involved in immune response	26	0.73344973	1.90255589	0.001814882	0.030113569	0.025636496	947	tags=42%, list=9%, signal=39%	FCER1G/LYN/CD300A/RAC2/FGR/HMOX1/IL13RA2/SYK/LGALS9/FES/C12orf4
GO:0043304	GO:0043304	regulation of mast cell degranulation	26	0.73344973	1.90255589	0.001814882	0.030113569	0.025636496	947	tags=42%, list=9%, signal=39%	FCER1G/LYN/CD300A/RAC2/FGR/HMOX1/IL13RA2/SYK/LGALS9/FES/C12orf4
GO:0045730	GO:0045730	respiratory burst	23	0.789811642	2.01826806	0.001814882	0.030113569	0.025636496	648	tags=35%, list=6%, signal=33%	HCK/CD52/NCF2/CYBB/RAC2/IGHA1/NCF4/RPS19
GO:0046596	GO:0046596	regulation of viral entry into host cell	26	0.797063644	2.06756928	0.001814882	0.030113569	0.025636496	883	tags=42%, list=8%, signal=39%	FCN1/IFITM1/PTX3/TRIM21/IFITM3/TRIM5/TRIM38/FCN3/LGALS9/CD74/LGALS1
GO:0050855	GO:0050855	regulation of B cell receptor signaling pathway	15	0.831549847	1.951135748	0.001814882	0.030113569	0.025636496	610	tags=47%, list=6%, signal=44%	LYN/CD300A/PTPN6/LPXN/PRKCB/PRKCH/CBFB
GO:0050857	GO:0050857	positive regulation of antigen receptor-mediated signaling pathway	15	0.84504883	1.982809554	0.001814882	0.030113569	0.025636496	611	tags=47%, list=6%, signal=44%	PTPRC/LYN/ADA/PRKCB/PRKCH/PRKD2/LCK
GO:0072604	GO:0072604	interleukin-6 secretion	26	0.795552098	2.063648357	0.001814882	0.030113569	0.025636496	544	tags=27%, list=5%, signal=26%	IFIH1/PYCARD/DDX58/HYAL2/SYT11/TWIST1/LGALS9
GO:0032727	GO:0032727	positive regulation of interferon-alpha production	16	0.789141671	1.869077745	0.001818182	0.030113569	0.025636496	1333	tags=44%, list=12%, signal=38%	IFIH1/IRF7/DDX58/STAT1/TLR7/TLR4/TLR3
GO:0033628	GO:0033628	regulation of cell adhesion mediated by integrin	34	0.698266502	1.909560208	0.001818182	0.030113569	0.025636496	973	tags=35%, list=9%, signal=32%	LYN/CCL5/ADA/NCKAP1L/PTPN6/LPXN/SYK/SNAI2/SWAP70/CCL21/PLAU/TESC
GO:0071675	GO:0071675	regulation of mononuclear cell migration	34	0.653963393	1.788403808	0.001818182	0.030113569	0.025636496	688	tags=29%, list=6%, signal=28%	C3AR1/LYN/CCR1/PLA2G7/PDGFD/CCL5/C5AR1/CXCL12/CXCL10/CCR2
GO:0001782	GO:0001782	B cell homeostasis	22	0.72439137	1.828977862	0.001821494	0.030113569	0.025636496	1070	tags=45%, list=10%, signal=41%	LYN/ADA/DOCK10/NCKAP1L/MEF2C/PPP2R3C/CD74/BAK1/CASP3/BAX
GO:0002755	GO:0002755	MyD88-dependent toll-like receptor signaling pathway	25	0.83856263	2.167443382	0.001821494	0.030113569	0.025636496	672	tags=40%, list=6%, signal=38%	CD36/CD14/LY96/TLR2/IRF7/CD300A/TLR1/MYD88/BTK/TLR7
GO:0002756	GO:0002756	MyD88-independent toll-like receptor signaling pathway	28	0.740622557	1.946118318	0.001821494	0.030113569	0.025636496	2004	tags=54%, list=18%, signal=44%	CD14/LY96/IRF7/BIRC3/CASP8/TLR4/FADD/UBE2D1/TLR3/IKBKB/TICAM1/TANK/UBE2D2/TBK1/UBE2D3
GO:0006910	GO:0006910	phagocytosis, recognition	22	0.83793066	2.115647273	0.001821494	0.030113569	0.025636496	680	tags=45%, list=6%, signal=43%	FCN1/CD36/IGHM/CLEC7A/IGHA1/TRBC1/IGHV3-23/FCN3/MFGE8/IGKC
GO:0032728	GO:0032728	positive regulation of interferon-beta production	25	0.697354523	1.80246101	0.001821494	0.030113569	0.025636496	1593	tags=36%, list=15%, signal=31%	IFIH1/TLR2/IRF7/DDX58/TLR7/TLR4/TLR3/TICAM1/HMGB2
GO:0033003	GO:0033003	regulation of mast cell activation	31	0.720012168	1.93396356	0.001821494	0.030113569	0.025636496	947	tags=39%, list=9%, signal=35%	FCER1G/LYN/CD300A/PLSCR1/RAC2/FGR/HMOX1/IL13RA2/SYK/LGALS9/FES/C12orf4
GO:0034142	GO:0034142	toll-like receptor 4 signaling pathway	22	0.770404493	1.945153988	0.001821494	0.030113569	0.025636496	387	tags=32%, list=4%, signal=31%	ITGB2/CD14/LYN/LY96/ITGAM/LTF/PELI1
GO:0035666	GO:0035666	TRIF-dependent toll-like receptor signaling pathway	25	0.745923786	1.927998596	0.001821494	0.030113569	0.025636496	2004	tags=60%, list=18%, signal=49%	CD14/LY96/IRF7/BIRC3/CASP8/TLR4/FADD/UBE2D1/TLR3/IKBKB/TICAM1/TANK/UBE2D2/TBK1/UBE2D3
GO:0050691	GO:0050691	regulation of defense response to virus by host	25	0.744727704	1.924907067	0.001821494	0.030113569	0.025636496	237	tags=24%, list=2%, signal=24%	PYCARD/IFIT1/DDX58/MICB/APOBEC3G/STAT1
GO:0051482	GO:0051482	positive regulation of cytosolic calcium ion concentration involved in phospholipase C-activating G-protein coupled signaling pathway	25	0.698645725	1.805798396	0.001821494	0.030113569	0.025636496	467	tags=20%, list=4%, signal=19%	LPAR6/GPR65/AGTR1/S1PR1/GPR18
GO:0072606	GO:0072606	interleukin-8 secretion	24	0.72779119	1.866743365	0.001821494	0.030113569	0.025636496	635	tags=38%, list=6%, signal=35%	FCN1/CD14/PYCARD/TLR2/TLR1/HYAL2/CD58/LGALS9/ANXA4
GO:2000249	GO:2000249	regulation of actin cytoskeleton reorganization	31	0.671217622	1.802900671	0.001821494	0.030113569	0.025636496	321	tags=23%, list=3%, signal=22%	HCK/HCLS1/CSF1R/GMFG/PDGFRA/ARHGDIB/NRP1
GO:0046597	GO:0046597	negative regulation of viral entry into host cell	17	0.830128655	1.99044809	0.001824818	0.030113569	0.025636496	470	tags=35%, list=4%, signal=34%	FCN1/IFITM1/PTX3/IFITM3/TRIM5/FCN3
GO:0032647	GO:0032647	regulation of interferon-alpha production	20	0.787612882	1.945446896	0.001834862	0.030113569	0.025636496	1333	tags=40%, list=12%, signal=35%	IFIH1/IRF7/NMI/DDX58/STAT1/TLR7/TLR4/TLR3
GO:0035025	GO:0035025	positive regulation of Rho protein signal transduction	20	0.744755552	1.839586947	0.001834862	0.030113569	0.025636496	1069	tags=25%, list=10%, signal=23%	LPAR6/GPR65/COL3A1/GPR18/GPR4
GO:0043302	GO:0043302	positive regulation of leukocyte degranulation	20	0.732049382	1.808202014	0.001834862	0.030113569	0.025636496	278	tags=25%, list=3%, signal=24%	ITGB2/FCER1G/ITGAM/FGR/SYK
GO:2000482	GO:2000482	regulation of interleukin-8 secretion	20	0.812919487	2.007955595	0.001834862	0.030113569	0.025636496	635	tags=45%, list=6%, signal=42%	FCN1/CD14/PYCARD/TLR2/TLR1/HYAL2/CD58/LGALS9/ANXA4
GO:0002888	GO:0002888	positive regulation of myeloid leukocyte mediated immunity	21	0.735654726	1.829825787	0.001841621	0.030113569	0.025636496	496	tags=33%, list=5%, signal=32%	ITGB2/FCER1G/ITGAM/FGR/SYK/BTK/C3
GO:0032607	GO:0032607	interferon-alpha production	21	0.779377569	1.938579505	0.001841621	0.030113569	0.025636496	1333	tags=38%, list=12%, signal=34%	IFIH1/IRF7/NMI/DDX58/STAT1/TLR7/TLR4/TLR3
GO:0036336	GO:0036336	dendritic cell migration	21	0.732148821	1.8211054	0.001841621	0.030113569	0.025636496	1136	tags=48%, list=10%, signal=43%	CCR1/CXCR4/CCL5/CCR5/CCL19/LGALS9/CCR2/CCL21/C1QBP/GPR183
GO:0002407	GO:0002407	dendritic cell chemotaxis	19	0.748048257	1.823820287	0.001855288	0.030113569	0.025636496	1136	tags=53%, list=10%, signal=47%	CCR1/CXCR4/CCL5/CCR5/CCL19/LGALS9/CCR2/CCL21/C1QBP/GPR183
GO:0035455	GO:0035455	response to interferon-alpha	18	0.840055994	2.027575107	0.001855288	0.030113569	0.025636496	293	tags=44%, list=3%, signal=43%	MX2/IFIT3/IFITM1/IFIT2/EIF2AK2/GATA3/IFITM3/ADAR
GO:0035456	GO:0035456	response to interferon-beta	19	0.746097504	1.819064146	0.001855288	0.030113569	0.025636496	1459	tags=58%, list=13%, signal=50%	XAF1/IFITM1/PLSCR1/IFITM3/STAT1/DDX41/AIM2/UBE2K/TLR3/HTRA2/IFNAR2
GO:0045061	GO:0045061	thymic T cell selection	18	0.760158375	1.834732696	0.001855288	0.030113569	0.025636496	737	tags=33%, list=7%, signal=31%	DOCK2/GATA3/CD3D/ITPKB/JAG2/CD74
GO:2000778	GO:2000778	positive regulation of interleukin-6 secretion	18	0.836833044	2.019796134	0.001855288	0.030113569	0.025636496	544	tags=33%, list=5%, signal=32%	IFIH1/PYCARD/DDX58/HYAL2/TWIST1/LGALS9
GO:0050765	GO:0050765	negative regulation of phagocytosis	12	0.815711701	1.806153998	0.001862197	0.030138618	0.025657821	1701	tags=67%, list=15%, signal=56%	TLR2/CD300A/SYT11/PTEN/CSK/ATG3/FCGR2B/SNX3
GO:0051770	GO:0051770	positive regulation of nitric-oxide synthase biosynthetic process	11	0.837404623	1.819189205	0.001883239	0.030304502	0.025799042	1334	tags=64%, list=12%, signal=56%	TLR2/STAT1/KDR/CCL2/NOD2/TLR4/CCL20
GO:1905153	GO:1905153	regulation of membrane invagination	11	0.846093013	1.838063981	0.001883239	0.030304502	0.025799042	337	tags=45%, list=3%, signal=44%	CD36/CD300A/PPARG/NCKAP1L/SYT11
GO:0001821	GO:0001821	histamine secretion	10	0.840006216	1.749335407	0.001930502	0.03045421	0.025926493	449	tags=30%, list=4%, signal=29%	LYN/ADA/BTK
GO:0032490	GO:0032490	detection of molecule of bacterial origin	10	0.865324784	1.802062001	0.001930502	0.03045421	0.025926493	1021	tags=60%, list=9%, signal=54%	LY96/TLR2/TLR1/TREM2/NOD2/TLR4
GO:0060099	GO:0060099	regulation of phagocytosis, engulfment	10	0.844839108	1.759400034	0.001930502	0.03045421	0.025926493	206	tags=40%, list=2%, signal=39%	CD36/CD300A/PPARG/NCKAP1L
GO:0070391	GO:0070391	response to lipoteichoic acid	10	0.83955011	1.748385553	0.001930502	0.03045421	0.025926493	251	tags=40%, list=2%, signal=39%	CD36/CD14/TLR2/TREM2
GO:0071223	GO:0071223	cellular response to lipoteichoic acid	10	0.83955011	1.748385553	0.001930502	0.03045421	0.025926493	251	tags=40%, list=2%, signal=39%	CD36/CD14/TLR2/TREM2
GO:0097048	GO:0097048	dendritic cell apoptotic process	10	0.844531579	1.758759596	0.001930502	0.03045421	0.025926493	874	tags=50%, list=8%, signal=46%	LYN/CXCL12/CCL19/LGALS9/CCL21
GO:2000668	GO:2000668	regulation of dendritic cell apoptotic process	10	0.844531579	1.758759596	0.001930502	0.03045421	0.025926493	874	tags=50%, list=8%, signal=46%	LYN/CXCL12/CCL19/LGALS9/CCL21
GO:0006107	GO:0006107	oxaloacetate metabolic process	11	-0.790964079	-1.800001753	0.002123142	0.033399347	0.028433767	506	tags=27%, list=5%, signal=26%	GHR/PCK1
GO:0019432	GO:0019432	triglyceride biosynthetic process	20	-0.738774338	-1.952915592	0.002188184	0.034326369	0.029222966	714	tags=30%, list=7%, signal=28%	GK/LPIN1/LPL/PCK1/SIK1
GO:0046460	GO:0046460	neutral lipid biosynthetic process	22	-0.734167742	-1.991629039	0.002207506	0.034437086	0.029317222	714	tags=36%, list=7%, signal=34%	NR1H2/GK/LPIN1/PLCE1/LPL/PCK1/SIK1
GO:0046463	GO:0046463	acylglycerol biosynthetic process	22	-0.734167742	-1.991629039	0.002207506	0.034437086	0.029317222	714	tags=36%, list=7%, signal=34%	NR1H2/GK/LPIN1/PLCE1/LPL/PCK1/SIK1
GO:0009066	GO:0009066	aspartate family amino acid metabolic process	44	-0.618528003	-1.941397936	0.002283105	0.035517778	0.030237245	1857	tags=48%, list=17%, signal=40%	MTHFD2L/CTH/GCAT/ADSS/PLOD3/PLOD1/ASRGL1/MSRA/GCDH/AHCY/ENOPH1/ADI1/PIPOX/GOT1/THNSL2/ASS1/CRYM/BHMT2/MTHFD1/BHMT
GO:0090181	GO:0090181	regulation of cholesterol metabolic process	47	-0.59897279	-1.906414426	0.002293578	0.035582138	0.030292036	1991	tags=45%, list=18%, signal=37%	MVD/SCAP/SREBF2/HMGCS1/ERLIN2/LSS/ACADVL/ACADL/LMF1/MBTPS1/FDFT1/ACACA/PMVK/TM7SF2/NR1H4/ACACB/APOE/FGF1/DHCR7/EPHX2
GO:0030049	GO:0030049	muscle filament sliding	38	-0.639819475	-1.932194086	0.002314815	0.035714286	0.030404537	591	tags=16%, list=5%, signal=15%	MYL3/DMD/TNNI1/TNNT2/TNNC1
GO:0033275	GO:0033275	actin-myosin filament sliding	38	-0.639819475	-1.932194086	0.002314815	0.035714286	0.030404537	591	tags=16%, list=5%, signal=15%	MYL3/DMD/TNNI1/TNNT2/TNNC1
GO:1901607	GO:1901607	alpha-amino acid biosynthetic process	54	-0.597077475	-1.943221375	0.002358491	0.036288447	0.030893336	1880	tags=50%, list=17%, signal=42%	AASS/MTHFD2L/OTC/CTH/ALDH18A1/CBS/PARK7/PLOD3/PLOD1/AHCY/ENOPH1/ADI1/GOT1/PHGDH/THNSL2/PSAT1/GGT1/ASS1/BHMT2/MTHFD1/ASL/GLS/GATM/SHMT1/BHMT/BCAT2
GO:0006721	GO:0006721	terpenoid metabolic process	81	-0.497940363	-1.767179255	0.00245098	0.037241379	0.031704593	1931	tags=35%, list=18%, signal=29%	PNPLA4/RBP4/DGAT1/EGFR/AGRN/UGT1A8/HMGCS1/STRA6/GPC4/ALDH1A2/CYP1B1/SDC2/FDFT1/CYP2C9/GPC3/APOC3/LRP2/APOM/DHRS3/APOE/HMGCS2/RARRES2/ALDH8A1/AKR1C1/CYP26B1/SDC1/LPL
GO:0043648	GO:0043648	dicarboxylic acid metabolic process	79	-0.512322005	-1.794521398	0.002457002	0.037241379	0.031704593	1851	tags=38%, list=17%, signal=32%	L2HGDH/MTHFD2L/ME3/SDHB/ALDH18A1/HAAO/SUCLG1/ACOT8/MTHFD2/ADSS/SUCLG2/FOLR1/ALDH4A1/QPRT/PRODH/FPGS/MTHFS/GOT1/FTCD/NR1H4/GGT1/ASS1/MTHFD1/GLS/GHR/SHMT1/PRODH2/ALDH1L1/PCK1
GO:1901606	GO:1901606	alpha-amino acid catabolic process	79	-0.543312712	-1.903073219	0.002457002	0.037241379	0.031704593	1478	tags=41%, list=13%, signal=35%	HAAO/GCAT/AMT/HMGCL/IVD/DAO/ACAT1/ASRGL1/ALDH4A1/QDPR/PRODH/MCCC1/AUH/GCDH/AHCY/PIPOX/GOT1/FTCD/THNSL2/DDAH1/PAH/CRYM/GLDC/GLS/ALDH6A1/SHMT1/BCAT2/ARG2/FAH/PRODH2/HPD
GO:0006873	GO:0006873	cellular ion homeostasis	490	0.346696849	1.370886392	0.002469136	0.037241379	0.031704593	1178	tags=13%, list=11%, signal=13%	C3AR1/CD36/PTPRC/LYN/CD52/CCR1/PTGER2/CORO1A/FPR3/LPAR6/APLNR/CXCR4/HTR2B/GPR65/AGTR1/CCL5/HEPH/LTF/CLIC2/HMOX1/PTPN6/PDGFRA/C5AR1/PRKCB/ANXA6/CCL8/S1PR1/CCR5/S100A8/CD38/FPR1/CXCL12/CXCL10/CCL19/SLC31A1/GPR18/KCNJ2/GNA15/CLIC4/SLC26A2/ATP6V0A2/SLC39A8/EDNRB/LCK/CCR2/ATP6V1B2/BAK1/CD40/TCIRG1/SWAP70/CCL21/MAFG/CAV1/TMEM165/THY1/APP/NUBP1/FTH1/ATP6V0E1/GPR4/BAX/NMU/CALM3/ATP1B3/MYO5A/ITPR3
GO:0019319	GO:0019319	hexose biosynthetic process	65	-0.613071497	-2.056430843	0.002469136	0.037241379	0.031704593	968	tags=32%, list=9%, signal=30%	ALDOA/PPARGC1A/SLC25A1/LEPR/KAT2B/G6PC3/GPD1/GPI/GOT1/ALDOC/PGM1/PDK2/FBP1/SLC37A4/ALDOB/ATF3/PC/G6PC/PCK1/SIK1
GO:0046364	GO:0046364	monosaccharide biosynthetic process	71	-0.600021615	-2.042438296	0.002475248	0.037241379	0.031704593	968	tags=31%, list=9%, signal=28%	AKR1A1/ALDOA/PPARGC1A/SLC25A1/LEPR/KAT2B/G6PC3/GPD1/GPI/GOT1/ALDOC/PGM1/PDK2/FBP1/SLC37A4/ALDOB/ATF3/PC/G6PC/PCK1/SIK1
GO:0019395	GO:0019395	fatty acid oxidation	84	-0.497852044	-1.781441534	0.002487562	0.037241379	0.031704593	1860	tags=38%, list=17%, signal=32%	PRKAG2/ECHDC2/HADH/FABP3/IRS2/ACAA2/ACOT8/IVD/AMACR/ADIPOR1/SLC25A17/ACADVL/ACADL/CPT2/ACAT1/ACOX2/PEX7/PPARGC1A/ACAA1/AUH/GCDH/DECR2/NR4A3/ETFB/ECHS1/HAO2/MCAT/ACACB/SLC27A2/FABP1/PDK4
GO:0006094	GO:0006094	gluconeogenesis	63	-0.654598334	-2.174586889	0.002493766	0.037241379	0.031704593	968	tags=33%, list=9%, signal=31%	ALDOA/PPARGC1A/SLC25A1/LEPR/KAT2B/G6PC3/GPD1/GPI/GOT1/ALDOC/PGM1/PDK2/FBP1/SLC37A4/ALDOB/ATF3/PC/G6PC/PCK1/SIK1
GO:0006805	GO:0006805	xenobiotic metabolic process	86	-0.474035514	-1.707123587	0.002493766	0.037241379	0.031704593	826	tags=34%, list=8%, signal=31%	GSTM3/BPHL/CYP2B6/CYP1B1/RORC/CYB5R3/CRYZ/CYP2C9/S100A12/ACAA1/SULT1A2/AKR7A2/CES2/GSTM4/FMO1/AKR7A3/CYP3A5/NQO1/GGT1/UGT2B28/GLYAT/GHR/AKR1C1/ACY1/EPHX2/CYP26B1/DPEP1/EPHX1
GO:0009062	GO:0009062	fatty acid catabolic process	86	-0.563709381	-2.030062202	0.002493766	0.037241379	0.031704593	1860	tags=38%, list=17%, signal=32%	ECHDC2/HADH/PLA2G15/IRS2/ACAA2/ACOT8/IVD/AMACR/SLC25A17/ACADVL/ACADL/CPT2/ACAT1/ACOX2/PEX7/CYP4F2/ACAA1/AUH/GCDH/DECR2/ETFB/ECHS1/FAAH/HAO2/MCAT/ACACB/CYP4A11/LPIN1/CYP4F3/SLC27A2/FABP1/PCK1
GO:0034440	GO:0034440	lipid oxidation	86	-0.474024869	-1.707085252	0.002493766	0.037241379	0.031704593	1860	tags=38%, list=17%, signal=32%	PRKAG2/ECHDC2/HADH/FABP3/IRS2/ACAA2/ACOT8/IVD/AMACR/ADIPOR1/SLC25A17/ACADVL/ACADL/CPT2/ACAT1/ACOX2/PEX7/PPARGC1A/ACAA1/AUH/GCDH/DECR2/NR4A3/ETFB/ECHS1/HAO2/MCAT/ACACB/SLC27A2/APOD/FABP1/PDK4
GO:0042060	GO:0042060	wound healing	448	0.371560025	1.463144254	0.0025	0.037241379	0.031704593	1142	tags=18%, list=10%, signal=17%	FCER1G/COL1A2/CD36/LYN/POSTN/TFPI2/PLSCR1/HBB/FN1/PDGFD/COL3A1/RAC2/LCP2/PLEK/CD44/SH2B3/A2M/HPSE/GATA3/MERTK/HMOX1/CAPZA1/PTPN6/DYSF/ENTPD1/MCAM/PDGFRA/SYK/PRKCB/PRKCH/WFDC1/SYT11/NOTCH4/CD34/S100A8/VAV1/PRCP/EHD3/THBD/RHOG/DSP/EZH2/FAP/GNA15/NINJ2/IGFBP1/RAP2B/PTEN/TIMP1/PLAUR/LCK/SERPING1/PROCR/CFLAR/VWF/F8/ACVRL1/MICAL1/CD40/PROS1/PF4/HDAC2/CLIC1/CBX5/CASP3/PDCD10/MAFG/PLAU/C1QBP/CAV1/SERPINE…
GO:0072009	GO:0072009	nephron epithelium development	91	-0.465910948	-1.691984662	0.002518892	0.037419045	0.031855845	1239	tags=32%, list=11%, signal=29%	SIX2/WWTR1/MAGED1/MYO1E/AHI1/FOXD1/TCF21/ACAT1/SMO/CTNNB1/KLHL3/CD24/WT1/MYC/GPC3/ILK/PTPRO/SALL1/CTNNBIP1/PROM1/LAMB2/NPHS1/FGF1/VEGFA/AGT/MAGI2/CALB1/UMOD
GO:0009063	GO:0009063	cellular amino acid catabolic process	92	-0.536331813	-1.948218203	0.002525253	0.037419045	0.031855845	1880	tags=43%, list=17%, signal=36%	AASS/OTC/ARG1/CTH/PCYOX1/CBS/HAAO/GCAT/AMT/HMGCL/IVD/DAO/ACAT1/ASRGL1/ALDH4A1/QDPR/PRODH/MCCC1/AUH/ABAT/GCDH/AHCY/PIPOX/GOT1/FTCD/THNSL2/DDAH1/BCKDHA/PAH/CRYM/GLDC/GLS/ALDH6A1/SHMT1/BCAT2/ARG2/FAH/PRODH2/HPD
GO:0001823	GO:0001823	mesonephros development	87	-0.474228595	-1.703424209	0.002557545	0.037498748	0.031923698	1873	tags=34%, list=17%, signal=29%	SMAD2/PAX2/SMAD4/FOXJ1/LGR4/BMP4/SIX2/MAGED1/FOXD1/TCF21/SMO/CTNNB1/BMP7/WT1/MYC/GPC3/EPCAM/ILK/SALL1/CTNNBIP1/FGF1/VEGFA/FGFR2/ZBTB16/AGT/REN/ARG2/SDC1/CALB1
GO:0006720	GO:0006720	isoprenoid metabolic process	97	-0.470861481	-1.727233675	0.002557545	0.037498748	0.031923698	2194	tags=37%, list=20%, signal=30%	PHYH/DHDDS/IDI1/MVD/AKR1C3/PNPLA4/RBP4/DPM2/DGAT1/EGFR/AGRN/UGT1A8/HMGCS1/STRA6/GPC4/ALDH1A2/CYP1B1/SDC2/FDFT1/CYP2C9/GPC3/PMVK/DPAGT1/APOC3/LRP2/APOM/DHRS3/APOE/HMGCS2/RARRES2/ALDH8A1/AKR1C1/CYP26B1/SDC1/LPL
GO:0070252	GO:0070252	actin-mediated cell contraction	95	-0.500779971	-1.821276466	0.002564103	0.037498748	0.031923698	1490	tags=23%, list=14%, signal=20%	TNNC2/STC1/ATP1A1/CTNNA3/NEDD4L/PARVA/TPM2/PDPN/ANK2/VIL1/SNTA1/GPD1L/MYL3/DMD/JUP/EPB41L5/TNNI1/CACNB2/TNNT2/PDE4B/TNNC1
GO:0072507	GO:0072507	divalent inorganic cation homeostasis	368	0.381897711	1.483091562	0.002567394	0.037498748	0.031923698	1178	tags=14%, list=11%, signal=13%	C3AR1/CD36/PTPRC/LYN/CD52/CCR1/PTGER2/CORO1A/FPR3/LPAR6/APLNR/CXCR4/HTR2B/GPR65/AGTR1/CCL5/CLIC2/PTPN6/PDGFRA/C5AR1/PRKCB/ANXA6/CCL8/S1PR1/CCR5/S100A8/CD38/FPR1/CXCL12/CXCL10/CCL19/GPR18/GNA15/SLC39A8/EDNRB/LCK/CCR2/BAK1/CD40/SWAP70/CCL21/CAV1/TMEM165/THY1/APP/GPR4/BAX/NMU/CALM3/MYO5A/ITPR3
GO:0006090	GO:0006090	pyruvate metabolic process	118	-0.412404448	-1.577255831	0.002570694	0.037498748	0.031923698	1613	tags=27%, list=15%, signal=23%	HAGH/AGXT/PRKAG2/DLAT/ME3/AAAS/PFKM/PFKFB2/MYOG/GLO1/SEH1L/BSG/DDIT4/LDHB/PFKL/ALDOA/PPARGC1A/NR4A3/GPD1/GPI/ALDOC/PGM1/PDK2/FBP1/IGF1/ALDOB/PC/DHTKD1/OGDHL/PDK4/PCK1
GO:0072073	GO:0072073	kidney epithelium development	118	-0.447830835	-1.712745336	0.002570694	0.037498748	0.031923698	1239	tags=29%, list=11%, signal=26%	SIX2/WWTR1/MAGED1/MYO1E/AHI1/FOXD1/TCF21/ACAT1/SMO/CTNNB1/BMP7/KLHL3/CD24/WT1/MYC/GPC3/EPCAM/ILK/PTPRO/SALL1/CTNNBIP1/PROM1/LAMB2/NPHS1/FGF1/VEGFA/FGFR2/AGT/MAGI2/ARG2/SDC1/CALB1/UMOD
GO:0030048	GO:0030048	actin filament-based movement	116	-0.499540539	-1.909879187	0.002590674	0.037594891	0.032005547	1499	tags=26%, list=14%, signal=23%	FLNA/TNNC2/STC1/ACTN4/ATP1A1/MYO1E/CTNNA3/NEDD4L/MYO1C/FNBP1L/MYO1B/PARVA/TPM2/PDPN/MYRIP/ANK2/VIL1/SNTA1/MYH9/GPD1L/MYL3/DMD/JUP/EPB41L5/TNNI1/CACNB2/TNNT2/PDE4B/TNNC1
GO:0072006	GO:0072006	nephron development	116	-0.421545732	-1.611683854	0.002590674	0.037594891	0.032005547	1239	tags=31%, list=11%, signal=28%	SIX2/WWTR1/MAGED1/MYO1E/AHI1/FOXD1/TCF21/ACAT1/SMO/CTNNB1/BMP7/KLHL3/CD24/ITGA3/WT1/MYC/GPC3/ENPEP/ILK/PTPRO/SALL1/CTNNBIP1/PROM1/LAMB2/SULF1/NPHS1/FGF1/VEGFA/SEC61A1/AGT/MAGI2/PLCE1/EGR1/CALB1/UMOD
GO:1903532	GO:1903532	positive regulation of secretion by cell	299	0.391564307	1.494613413	0.002642008	0.038095238	0.032431506	935	tags=12%, list=9%, signal=12%	ITGB2/FCER1G/FCN1/CD14/IFIH1/PYCARD/TLR2/CASP1/POSTN/DDX58/TLR1/CSF1R/HTR2B/ITGAM/GATA3/FGR/HYAL2/SYK/CD34/CD38/HLA-E/TWIST1/CXCL12/CCL19/CD58/LGALS9/SOX4/CLEC5A/CARD8/VEGFC/SDCBP/NOD2/CRTAM/TNFRSF4/AIM2/CADPS2/VPS4B
GO:0042737	GO:0042737	drug catabolic process	104	-0.452151652	-1.685765769	0.002645503	0.038095238	0.032431506	1447	tags=30%, list=13%, signal=26%	GCAT/PAOX/CYP2B6/AMT/ALDH2/DAO/SNCA/ACAT1/ASRGL1/PRDX6/BDH1/QDPR/QPRT/CYP2C9/MAOB/SULT1A2/ALDH3B1/PIPOX/CYP3A5/PRDX2/MTHFS/PAH/GLDC/FAH/DPYS/GPX3/MAOA/CHI3L1/HPD/PCK1
GO:0051090	GO:0051090	regulation of DNA binding transcription factor activity	320	0.381591905	1.460107117	0.002645503	0.038095238	0.032431506	1349	tags=18%, list=12%, signal=17%	ITGB2/HCK/CD36/PYCARD/TLR2/DDX58/TRIM22/PPARG/EIF2AK2/LTF/TRIM21/MYD88/HMOX1/KRAS/SYK/PRKCB/PRKCH/CEBPG/TRIM5/TRIM38/S100A8/PELI1/ADORA3/TWIST1/BTK/EZH2/TRIM14/SP100/LGALS9/SPHK1/PRKD2/PTEN/CARD8/ANXA4/CFLAR/COPS5/NOD2/RWDD1/CD40/TNFRSF4/HDAC2/AIM2/ID3/APP/SMAD7/TRAF1/TLR4/NFKBIE/PSMA6/KDM5A/ARRB2/RBCK1/SUMO1/HDAC5/CYLD/SPOP/TLR3/PPP3CA/IKBKB
GO:0051047	GO:0051047	positive regulation of secretion	325	0.375642348	1.437881694	0.002659574	0.03810687	0.032441409	782	tags=11%, list=7%, signal=11%	ITGB2/FCER1G/FCN1/CD14/IFIH1/PYCARD/TLR2/CASP1/POSTN/DDX58/TLR1/CSF1R/HTR2B/ITGAM/GATA3/FGR/HYAL2/SYK/CD34/S100A8/CD38/HLA-E/TWIST1/CXCL12/CCL19/CD58/LGALS9/SOX4/EDNRB/CLEC5A/CARD8/VEGFC/SDCBP/NOD2/CRTAM/TNFRSF4
GO:0006766	GO:0006766	vitamin metabolic process	111	-0.447948326	-1.691123103	0.002666667	0.03810687	0.032441409	936	tags=22%, list=9%, signal=20%	FOLR1/THTPA/CYP4F2/LMBRD1/MCCC1/ACACA/FPGS/CYB5A/PLTP/LRP2/MTHFS/ACACB/PSAT1/VNN1/MTHFD1/SLC19A2/CUBN/PC/SHMT1/CYP26B1/ALDH1L1/AOX1/CYP27B1
GO:0043062	GO:0043062	extracellular structure organization	328	0.377793875	1.445942759	0.002666667	0.03810687	0.032441409	983	tags=16%, list=9%, signal=15%	ITGB2/COL1A2/CD36/COL6A3/LCP1/CTSS/TGFBI/POSTN/PLA2G7/FN1/COL3A1/ADAMTS5/AGTR1/CD44/COL4A1/COL4A2/ITGAM/A2M/ICAM2/APOC1/PECAM1/ITGA8/COL5A2/CD34/JAM2/ABCA1/CTSK/KDR/VCAN/LUM/FAP/CSGALNACT1/NID2/TIMP1/SERPINH1/FBN1/FSCN1/CFLAR/SDCBP/VWF/LAMA2/MPV17/ABCG1/ADAM10/VCAM1/SOAT1/ENG/LAMC1/LIPC/THBS2/MMP2/APP/LAMB1/ITGAL
GO:0072329	GO:0072329	monocarboxylic acid catabolic process	102	-0.581708483	-2.150414935	0.002695418	0.038419965	0.032707955	1952	tags=40%, list=18%, signal=33%	AGXT/AKT1/ECHDC2/HADH/PLA2G15/IRS2/ACAA2/ACOT8/IVD/AMACR/SLC25A17/ACADVL/ACADL/CPT2/ACAT1/ASRGL1/ACOX2/AKR1A1/PEX7/CYP4F2/ACAA1/AUH/ABAT/GCDH/DECR2/ETFB/ECHS1/CRYL1/DCXR/FAAH/HAO2/MCAT/ACACB/CYP4A11/LPIN1/CYP4F3/SLC27A2/CYP26B1/FABP1/PCK1
GO:0045333	GO:0045333	cellular respiration	135	-0.416626428	-1.618146578	0.002770083	0.039284815	0.033444225	2498	tags=37%, list=23%, signal=29%	NDUFA7/MECP2/BLOC1S1/IDH3A/SLC25A12/NDUFA4/BNIP3/SDHA/NDUFS5/UQCRQ/TRAP1/NDUFV2/NNT/NDUFS4/DLAT/ME3/SDHB/NDUFS6/SUCLG1/OXA1L/PARK7/NDUFA3/SNCA/COQ10B/ACO2/SUCLG2/NDUFB11/NDUFA13/IDH3B/NDUFS7/COQ7/TBRG4/PPARGC1A/CS/NDUFA10/SIRT3/NR4A3/NDUFB7/NDUFS8/ETFB/GPD1/UQCRFS1/MTFR1/UQCRC1/CYC1/ACO1/NDUFV1/DHTKD1/OGDHL
GO:0071466	GO:0071466	cellular response to xenobiotic stimulus	135	-0.404466266	-1.570917398	0.002770083	0.039284815	0.033444225	1846	tags=32%, list=17%, signal=27%	TFAP4/ARG1/EGFR/UGT1A8/CASQ2/CYP3A7/GSTM3/BPHL/CASP9/CYP2B6/CYP1B1/RORC/CYB5R3/CACNA1S/DDIT4/ABCC2/CRYZ/CYP2C9/S100A12/AIF1/PPARGC1A/ACAA1/SULT1A2/AKR7A2/CES2/GSTM4/FMO1/AKR7A3/CYP3A5/NQO1/GGT1/UGT2B28/GLYAT/GHR/AKR1C1/ACY1/EPHX2/CYP26B1/EGR1/DPEP1/EPHX1/PCK1
GO:0007162	GO:0007162	negative regulation of cell adhesion	201	0.403950108	1.474937569	0.002832861	0.040073926	0.034116016	1148	tags=21%, list=10%, signal=20%	PTPRC/TGFBI/POSTN/CD300A/GBP1/FXYD5/HLX/IDO1/CORO1C/PTPN6/LPXN/LILRB2/CD86/ARHGDIB/SNAI2/JAM2/PELI1/LRRC32/CXCL12/ANGPT1/CDH13/LGALS9/PTEN/ADAMDEC1/ACVRL1/CD74/TNFRSF21/SWAP70/CASP3/ADAM10/PLXNA2/CCL21/ANGPT2/LGALS1/BCL6/SERPINE2/SMAD7/PLXND1/JAG1/ANXA1/HLA-G/TNC/GTPBP4
GO:0006006	GO:0006006	glucose metabolic process	151	-0.458477264	-1.799820821	0.00286533	0.040330051	0.034334063	1661	tags=30%, list=15%, signal=26%	DLAT/MST1/IRS2/SLC25A11/C1QTNF1/PFKM/PFKFB2/ADIPOR1/RORC/MAEA/IGF2/SIRT1/SLC25A10/AKR1A1/PFKL/PHKG2/ALDOA/PPARGC1A/IGFBP4/SLC25A1/LEPR/KAT2B/NISCH/G6PC3/GPD1/GPI/DCXR/GOT1/ALDOC/PGM1/ACACB/BAD/PDK2/FBP1/IGF1/PPP1CA/SLC37A4/ALDOB/ATF3/PC/APOD/G6PC/PDK4/PCK1/SIK1
GO:0016052	GO:0016052	carbohydrate catabolic process	151	-0.394627392	-1.549168637	0.00286533	0.040330051	0.034334063	1393	tags=24%, list=13%, signal=21%	PFKFB2/MYOG/PHKA1/FUT6/SEH1L/DDIT4/MAN2C1/AKR1A1/STBD1/PFKL/PHKG2/ALDOA/GBA3/PPARGC1A/CRYL1/GPD1/GPI/AGL/DCXR/MGAM/GK/MAN2B2/ALDOC/TREH/GYG2/PGM1/BAD/KHK/FBP1/IGF1/PPP1CA/ALDOB/DHTKD1/OGDHL/G6PC
GO:0051701	GO:0051701	interaction with host	170	0.414270556	1.495443925	0.002877698	0.040402878	0.034396062	1198	tags=20%, list=11%, signal=18%	FCN1/IFIT1/IFITM1/PTX3/CXCR4/TYMS/EIF2AK2/TRIM21/IFITM3/HYAL2/CD86/TRIM5/TRIM38/CCR5/FCN3/KPNA2/LGALS9/CLEC5A/SCARB2/GRB2/CD74/TNFRSF4/LGALS1/VPS4B/CAV1/CTSB/CAV2/CASP8/NPC1/NUP153/SIVA1/VPS37B/TNFRSF14/DYNLT1
GO:0006814	GO:0006814	sodium ion transport	155	-0.385525446	-1.51194521	0.002941176	0.041088674	0.034979899	1277	tags=19%, list=12%, signal=17%	ATP1A1/SLC6A2/SLC9A6/NEDD4L/SLC13A2/SLC38A10/SLC12A3/PRSS8/SLC38A2/KLHL3/SLC4A4/SLC22A4/SLC22A5/PER1/SNTA1/FXYD1/SLC5A2/GPD1L/CNTN1/DMD/PTPN3/SLC9A3R1/SLC17A1/SCNN1A/SLC13A3/FXYD2/SLC17A3/SIK1
GO:0051048	GO:0051048	negative regulation of secretion	164	0.427775806	1.530511392	0.002941176	0.041088674	0.034979899	1153	tags=18%, list=10%, signal=17%	RSAD2/CD300A/GBP1/FN1/SRGN/ADA/UCP2/HMOX1/IL13RA2/SYT11/CD34/RHBDF2/RAP1A/LRRC32/MAP4K4/ANGPT1/LGALS9/CARD8/ANXA4/CCR2/CD74/TNFRSF21/SFRP1/VPS4B/RAB11FIP1/ANXA1/TRIM9/IRS1/NMU/ERP29
GO:0006694	GO:0006694	steroid biosynthetic process	156	-0.446584197	-1.750026751	0.00295858	0.041229242	0.035099569	2004	tags=29%, list=18%, signal=24%	IDI1/MVD/HSD3B1/CYP39A1/AKR1C3/CYB5R1/SCAP/PRKAG2/SREBF2/HMGCS1/ERLIN2/ACAA2/ACOT8/DHRS11/LSS/AMACR/TFCP2L1/ATP1A1/CYB5R3/ACAT1/HSD17B14/ACOX2/HSD17B8/SIRT1/MBTPS1/CYB5R2/FDFT1/OSBP/PPARGC1A/ACACA/PMVK/TM7SF2/NR1H4/ACACB/CYP17A1/APOE/FGF1/HMGCS2/DHCR7/HSD17B2/HSD11B2/SLC27A2/FGFR4/EGR1/CYP27B1
GO:0006888	GO:0006888	ER to Golgi vesicle-mediated transport	157	-0.403676153	-1.578331391	0.003012048	0.041767068	0.035557434	2374	tags=38%, list=22%, signal=30%	F5/TMED2/RANGRF/TRAPPC9/LMAN2/ACTR10/DYNC1LI1/LMAN1/DCTN2/DYNC1H1/SEC31B/SEC23B/ARFGAP3/YIF1A/TMED5/COPA/ANK3/USO1/TRAPPC2L/CREB3L2/TRAPPC10/ARCN1/CNIH3/STX5/PDCD6/COG4/RNF139/COG2/CD55/DCTN1/F9/KLHL12/PROZ/PREB/TMEM115/NAPA/LMF1/DCTN4/FOLR1/TRAPPC6A/PROC/TEX261/MPPE1/SEC24C/COPZ1/SPTB/ANK2/GOLGB1/COPE/RAB1B/ANKRD28/COG7/ARFGAP2/TMED3/HYOU1/SPTAN1/SERPINA1/GAS1
GO:0044242	GO:0044242	cellular lipid catabolic process	157	-0.406634306	-1.589897459	0.003012048	0.041767068	0.035557434	1563	tags=31%, list=14%, signal=27%	AKR1C3/PNPLA4/AKT1/ECHDC2/HADH/PNPLA2/FABP3/PLA2G15/IRS2/ACAA2/ACOT8/SIRT2/CYP1B1/IVD/AMACR/SLC25A17/ACADVL/ACADL/CPT2/ACAT1/ACOX2/PRDX6/PEX7/CYP4F2/GBA3/ACAA1/SMPD1/AUH/GCDH/DECR2/APOC3/ETFB/ECHS1/ANGPTL3/FAAH/GALC/HAO2/MCAT/ACACB/APOE/CYP4A11/LPIN1/CYP4F3/SLC27A2/CYP26B1/FABP1/LPL/PCK1
GO:0017157	GO:0017157	regulation of exocytosis	137	0.440789128	1.539122151	0.00310559	0.042958113	0.036571403	1093	tags=18%, list=10%, signal=17%	ITGB2/FCER1G/LYN/CD300A/RAC2/ITGAM/FGR/RAPGEF4/HMOX1/IL13RA2/SYK/SYT11/RAP1A/RALA/LGALS9/SDCBP/CCR2/MICAL1/FES/CADPS2/VPS4B/C12orf4/ANXA1/TRIM9/RAB8B
GO:1901605	GO:1901605	alpha-amino acid metabolic process	169	-0.554628773	-2.1902169	0.003194888	0.044008228	0.037465394	1910	tags=42%, list=17%, signal=35%	AGXT/AASS/DCT/MTHFD2L/OTC/ARG1/SLC6A8/CTH/ALDH18A1/CBS/HAAO/GCAT/AMT/PARK7/HMGCL/CKMT2/IVD/ADSS/DAO/PLOD3/PLOD1/ACAT1/ASRGL1/SARS/ALDH4A1/ODC1/QDPR/MSRA/PRODH/MCCC1/AUH/SLC7A7/GCDH/FPGS/AHCY/ENOPH1/ADI1/PIPOX/MTHFS/GOT1/PHGDH/FTCD/NR1H4/THNSL2/DDAH1/CKB/PSAT1/GGT1/ASS1/PAH/CRYM/MPST/BHMT2/MTHFD1/ASL/GLDC/GLS/GATM/GLYAT/ALDH6A1/NOX4/GHR/SHMT1/BHMT/BCAT2/ARG2/FAH/PRODH2/DPEP1/HPD
GO:0045807	GO:0045807	positive regulation of endocytosis	109	0.461751213	1.563291667	0.003205128	0.044008228	0.037465394	1599	tags=25%, list=15%, signal=21%	FCER1G/CD36/CD14/PYCARD/DOCK2/PTX3/PPARG/NCKAP1L/MERTK/SYK/RAP1A/CCL19/C3/ANGPT1/MFGE8/CCL2/C2/CCL21/ARRB2/PPT1/PPP3CA/SLC11A1/B2M/IL1B/FCGR2B/DNM1L/CD47
GO:0060402	GO:0060402	calcium ion transport into cytosol	119	0.447509848	1.529007259	0.003225806	0.044008228	0.037465394	1178	tags=16%, list=11%, signal=14%	PTPRC/LYN/CORO1A/APLNR/HTR2B/CLIC2/PTPN6/CCR5/CXCL10/CCL19/LCK/BAK1/CCL21/CAV1/THY1/BAX/CALM3/MYO5A/ITPR3
GO:1904950	GO:1904950	negative regulation of establishment of protein localization	121	0.437565777	1.493745968	0.003225806	0.044008228	0.037465394	1601	tags=26%, list=15%, signal=23%	RSAD2/GBP1/FN1/SRGN/UCP2/SYT11/CD34/RHBDF2/LRRC32/MAP4K4/SP100/ANGPT1/UBE2J1/SOX4/PDE2A/CARD8/ANXA4/CSK/TNFRSF21/SFRP1/RAB11FIP1/ANXA1/IRS1/ERP29/DNAJA1/PPP3CA/FKBP1B/INPP5K/IL1B/FCGR2B/HDAC1/CDK5
GO:0030260	GO:0030260	entry into host cell	114	0.458578811	1.553993455	0.003246753	0.044008228	0.037465394	1198	tags=24%, list=11%, signal=21%	FCN1/IFITM1/PTX3/CXCR4/TRIM21/IFITM3/HYAL2/CD86/TRIM5/TRIM38/CCR5/FCN3/LGALS9/CLEC5A/SCARB2/GRB2/CD74/TNFRSF4/LGALS1/CAV1/CTSB/CAV2/NPC1/NUP153/SIVA1/TNFRSF14/DYNLT1
GO:0044409	GO:0044409	entry into host	114	0.458578811	1.553993455	0.003246753	0.044008228	0.037465394	1198	tags=24%, list=11%, signal=21%	FCN1/IFITM1/PTX3/CXCR4/TRIM21/IFITM3/HYAL2/CD86/TRIM5/TRIM38/CCR5/FCN3/LGALS9/CLEC5A/SCARB2/GRB2/CD74/TNFRSF4/LGALS1/CAV1/CTSB/CAV2/NPC1/NUP153/SIVA1/TNFRSF14/DYNLT1
GO:0051806	GO:0051806	entry into cell of other organism involved in symbiotic interaction	114	0.458578811	1.553993455	0.003246753	0.044008228	0.037465394	1198	tags=24%, list=11%, signal=21%	FCN1/IFITM1/PTX3/CXCR4/TRIM21/IFITM3/HYAL2/CD86/TRIM5/TRIM38/CCR5/FCN3/LGALS9/CLEC5A/SCARB2/GRB2/CD74/TNFRSF4/LGALS1/CAV1/CTSB/CAV2/NPC1/NUP153/SIVA1/TNFRSF14/DYNLT1
GO:0051828	GO:0051828	entry into other organism involved in symbiotic interaction	114	0.458578811	1.553993455	0.003246753	0.044008228	0.037465394	1198	tags=24%, list=11%, signal=21%	FCN1/IFITM1/PTX3/CXCR4/TRIM21/IFITM3/HYAL2/CD86/TRIM5/TRIM38/CCR5/FCN3/LGALS9/CLEC5A/SCARB2/GRB2/CD74/TNFRSF4/LGALS1/CAV1/CTSB/CAV2/NPC1/NUP153/SIVA1/TNFRSF14/DYNLT1
GO:1901532	GO:1901532	regulation of hematopoietic progenitor cell differentiation	89	0.491415772	1.623400806	0.003252033	0.044008228	0.037465394	2423	tags=40%, list=22%, signal=32%	PSMB9/EIF2AK2/GATA3/PSME2/PSMB8/PSMC2/PSMA7/CBFB/PSME1/PSMA3/LMO2/PSMD7/PSMD14/PSMA5/PSMA6/PSMC6/HIST1H3G/TAL1/PSMB4/PSMC4/PSMA4/PSMB2/PSME4/PDCD2/PSMD11/PSMB10/NOTCH1/TCF3/GATA2/PSMB5/PSMD4/PSMD12/PSMD10/PSMD13/YTHDF2/PSMD1
GO:0097530	GO:0097530	granulocyte migration	98	0.483713371	1.613596482	0.003273322	0.044189853	0.037620016	1092	tags=24%, list=10%, signal=22%	ITGB2/C3AR1/FCER1G/CD300A/CCL4/RAC2/CCL5/PECAM1/NCKAP1L/C5AR1/SYK/CKLF/CCL8/S100A8/VAV1/CCL19/CCL2/CD74/PF4/CCL21/CCL18/C1QBP/ANXA1/MPP1
GO:0002718	GO:0002718	regulation of cytokine production involved in immune response	61	0.554574166	1.742073068	0.003294893	0.044374385	0.037777114	1499	tags=31%, list=14%, signal=27%	RSAD2/FCER1G/CD36/GATA3/HMOX1/SASH3/BTK/ANGPT1/SPON2/CD74/NOD2/GPRC5B/BCL6/SMAD7/TLR4/TLR3/B2M/TBX21/HK1
GO:0019318	GO:0019318	hexose metabolic process	186	-0.421930862	-1.690133457	0.003311258	0.044488102	0.037873924	1661	tags=28%, list=15%, signal=25%	DLAT/MST1/IRS2/SLC25A11/C1QTNF1/MPI/PFKM/PFKFB2/ADIPOR1/FUT6/RORC/MAEA/IGF2/SIRT1/SLC25A10/MAN2C1/AKR1A1/PFKL/PHKG2/ALDOA/PPARGC1A/IGFBP4/SLC25A1/LEPR/KAT2B/NISCH/G6PC3/GPD1/GPI/DCXR/MAN2B2/GOT1/ALDOC/PGM1/ACACB/BAD/KHK/PDK2/FBP1/IGF1/PPP1CA/SLC37A4/ALDOB/MAN2A1/PMM1/ATF3/PC/APOD/G6PC/PDK4/PCK1/SIK1
GO:1902036	GO:1902036	regulation of hematopoietic stem cell differentiation	84	0.503894552	1.643493501	0.003333333	0.044677804	0.038035423	2423	tags=40%, list=22%, signal=32%	PSMB9/EIF2AK2/GATA3/PSME2/PSMB8/PSMC2/PSMA7/CBFB/PSME1/PSMA3/LMO2/PSMD7/PSMD14/PSMA5/PSMA6/PSMC6/HIST1H3G/TAL1/PSMB4/PSMC4/PSMA4/PSMB2/PSME4/PSMD11/PSMB10/TCF3/GATA2/PSMB5/PSMD4/PSMD12/PSMD10/PSMD13/YTHDF2/PSMD1
GO:0016051	GO:0016051	carbohydrate biosynthetic process	172	-0.416134942	-1.637979157	0.003367003	0.044914705	0.038237103	1534	tags=24%, list=14%, signal=21%	SLC25A11/IMPAD1/GYS1/EXT2/B3GNT4/SNCA/MAEA/IGF2/SLC25A10/AKR1A1/PHKG2/ALDOA/PPARGC1A/SLC25A1/ST3GAL4/LEPR/KAT2B/G6PC3/GPD1/GPI/UGP2/AGL/GOT1/ALDOC/GYG2/PGM1/EGF/PDK2/FBP1/IGF1/PPP1CA/SLC37A4/ALDOB/ATF3/PTH1R/PC/B3GALT2/G6PC/PCK1/SIK1
GO:1901617	GO:1901617	organic hydroxy compound biosynthetic process	199	-0.39621388	-1.586305866	0.003367003	0.044914705	0.038237103	2228	tags=32%, list=20%, signal=26%	IMPA1/MVK/DDT/IMPA2/EBP/DHDDS/ASIP/G6PD/IDI1/MVD/CYP39A1/AKR1C3/MAS1/CYB5R1/SCAP/SPTLC1/WNT5A/PRKAG2/SREBF2/DCT/HMGCS1/ERLIN2/ACAA2/IMPAD1/ACOT8/LSS/PARK7/OCA2/AMACR/PNMT/DAO/SNCA/CYB5R3/ACAT1/ACOX2/SIRT1/TYRP1/MBTPS1/QDPR/CYB5R2/FDFT1/OSBP/ACACA/PMVK/DDC/PLTP/GOT1/TM7SF2/IP6K2/NR1H4/ACACB/PSAT1/PAH/APOE/FGF1/NR4A2/HMGCS2/DHCR7/PTH1R/SLC27A2/FGFR4/CYP27B1/PCK1
GO:0005996	GO:0005996	monosaccharide metabolic process	210	-0.422769894	-1.715549739	0.003389831	0.045112057	0.038405114	1613	tags=28%, list=15%, signal=24%	MST1/IRS2/SLC25A11/C1QTNF1/MPI/PFKM/PFKFB2/ADIPOR1/FUT6/RORC/MAEA/CYB5R3/IGF2/SIRT1/SLC25A10/MAN2C1/AKR1A1/PFKL/PHKG2/ALDOA/PPARGC1A/IGFBP4/SLC25A1/LEPR/KAT2B/NISCH/CRYL1/G6PC3/GPD1/CYB5A/GPI/DCXR/MAN2B2/GOT1/ALDOC/UGT2A3/PGM1/ACACB/BAD/FGGY/KHK/PDK2/FBP1/IGF1/PPP1CA/UGT2B28/SLC37A4/ALDOB/MAN2A1/PMM1/ATF3/PC/APOD/G6PC/PDK4/PCK1/SIK1
GO:0016054	GO:0016054	organic acid catabolic process	208	-0.496988216	-2.010926901	0.003424658	0.045360558	0.03861667	1880	tags=37%, list=17%, signal=31%	AKT1/AASS/ECHDC2/OTC/ARG1/HADH/RENBP/CTH/PCYOX1/PLA2G15/IRS2/CBS/ACAA2/HAAO/GCAT/ACOT8/AMT/HMGCL/IVD/AMACR/SLC25A17/DAO/ACADVL/ACADL/CPT2/ACAT1/ASRGL1/ACOX2/AKR1A1/ALDH4A1/PEX7/QDPR/CYP4F2/QPRT/PRODH/ACAA1/MCCC1/AUH/ABAT/GCDH/DECR2/ETFB/ECHS1/AHCY/CRYL1/PIPOX/DCXR/FAAH/MTHFS/GOT1/FTCD/HAO2/THNSL2/MCAT/DDAH1/ACACB/BCKDHA/PAH/CRYM/CYP4A11/GLDC/GLS/ALDH6A1/LPIN1/CYP4F3/SHMT1/BCAT2/SLC27A2/ARG2/CYP26…
GO:0046395	GO:0046395	carboxylic acid catabolic process	208	-0.496988216	-2.010926901	0.003424658	0.045360558	0.03861667	1880	tags=37%, list=17%, signal=31%	AKT1/AASS/ECHDC2/OTC/ARG1/HADH/RENBP/CTH/PCYOX1/PLA2G15/IRS2/CBS/ACAA2/HAAO/GCAT/ACOT8/AMT/HMGCL/IVD/AMACR/SLC25A17/DAO/ACADVL/ACADL/CPT2/ACAT1/ASRGL1/ACOX2/AKR1A1/ALDH4A1/PEX7/QDPR/CYP4F2/QPRT/PRODH/ACAA1/MCCC1/AUH/ABAT/GCDH/DECR2/ETFB/ECHS1/AHCY/CRYL1/PIPOX/DCXR/FAAH/MTHFS/GOT1/FTCD/HAO2/THNSL2/MCAT/DDAH1/ACACB/BCKDHA/PAH/CRYM/CYP4A11/GLDC/GLS/ALDH6A1/LPIN1/CYP4F3/SHMT1/BCAT2/SLC27A2/ARG2/CYP26…
GO:0002230	GO:0002230	positive regulation of defense response to virus by host	14	0.796656686	1.850272365	0.003584229	0.045667447	0.038877933	881	tags=36%, list=8%, signal=33%	PYCARD/DDX58/APOBEC3G/STAT1/AIM2
GO:0008202	GO:0008202	steroid metabolic process	259	-0.385049962	-1.611064247	0.003597122	0.045667447	0.038877933	1472	tags=23%, list=13%, signal=21%	ACAA2/ACOT8/DHRS11/CYP2B6/LSS/VLDLR/CYP1B1/AMACR/SERPINA6/TFCP2L1/ATP1A1/TIPARP/RORC/ACADVL/CYB5R3/ACADL/ACAT1/HSD17B14/ACOX2/HSD17B8/SIRT1/LMF1/MBTPS1/CYB5R2/FDFT1/CYP2C9/OSBP/PPARGC1A/ACAA1/ACACA/SULT1A2/PMVK/LEPR/ANGPTL3/CYP3A5/LRP2/TM7SF2/WWOX/NR1H4/HDLBP/ACACB/CYP17A1/APOE/FGF1/UGT2B28/CUBN/AGT/HMGCS2/DHCR7/HSD17B2/HSD11B2/AKR1C1/SLC27A2/EPHX2/CYP26B1/FGFR4/EGR1/G6PC/CYP27B1
GO:0032069	GO:0032069	regulation of nuclease activity	27	0.656391985	1.713196134	0.003616637	0.045667447	0.038877933	1593	tags=41%, list=15%, signal=35%	OAS3/OAS2/OAS1/GZMA/OASL/BAK1/BAX/ABCE1/PCNA/NPM1/HMGB2
GO:0032735	GO:0032735	positive regulation of interleukin-12 production	27	0.737668897	1.925330491	0.003616637	0.045667447	0.038877933	1333	tags=41%, list=12%, signal=36%	CD36/TLR2/IRF8/IDO1/LTB/CCL19/LGALS9/CD40/TLR4/HLA-G/TLR3
GO:0042554	GO:0042554	superoxide anion generation	27	0.618170786	1.613438044	0.003616637	0.045667447	0.038877933	278	tags=19%, list=3%, signal=18%	ITGB2/NCF2/CYBB/ITGAM/SYK
GO:2000516	GO:2000516	positive regulation of CD4-positive, alpha-beta T cell activation	27	0.619369477	1.616566653	0.003616637	0.045667447	0.038877933	1195	tags=37%, list=11%, signal=33%	HLX/NCKAP1L/CD86/SASH3/CCL19/LGALS9/CD83/ANXA1/IL18/TGFBR2
GO:0033630	GO:0033630	positive regulation of cell adhesion mediated by integrin	15	0.775307681	1.819169995	0.003629764	0.045667447	0.038877933	874	tags=33%, list=8%, signal=31%	CCL5/NCKAP1L/PTPN6/SYK/CCL21
GO:0043552	GO:0043552	positive regulation of phosphatidylinositol 3-kinase activity	26	0.639093342	1.657797053	0.003629764	0.045667447	0.038877933	1066	tags=31%, list=10%, signal=28%	LYN/FGR/PDGFRA/CCL19/NOD2/CCL21/FGFR3/IRS1
GO:0045920	GO:0045920	negative regulation of exocytosis	26	0.650496597	1.687376901	0.003629764	0.045667447	0.038877933	1061	tags=35%, list=10%, signal=31%	CD300A/HMOX1/IL13RA2/RAP1A/LGALS9/CCR2/VPS4B/ANXA1/TRIM9
GO:0055094	GO:0055094	response to lipoprotein particle	23	0.672155951	1.717613183	0.003629764	0.045667447	0.038877933	504	tags=35%, list=5%, signal=33%	ITGB2/FCER1G/CD36/PPARG/MYD88/SYK/ABCA1/CDH13
GO:0061298	GO:0061298	retina vasculature development in camera-type eye	15	0.779641409	1.829338589	0.003629764	0.045667447	0.038877933	735	tags=40%, list=7%, signal=37%	COL4A1/PDGFRA/ARHGEF15/NRP1/CLIC4/ACVRL1
GO:0090023	GO:0090023	positive regulation of neutrophil chemotaxis	26	0.643830939	1.670086298	0.003629764	0.045667447	0.038877933	933	tags=35%, list=8%, signal=32%	C3AR1/RAC2/NCKAP1L/C5AR1/CCL19/CD74/PF4/CCL21/C1QBP
GO:0030851	GO:0030851	granulocyte differentiation	24	0.664602689	1.704668421	0.003642987	0.045667447	0.038877933	1336	tags=25%, list=12%, signal=22%	HCLS1/EVI2B/CEBPA/INPP5D/TESC/TAL1
GO:0032733	GO:0032733	positive regulation of interleukin-10 production	22	0.697590429	1.761309567	0.003642987	0.045667447	0.038877933	1021	tags=41%, list=9%, signal=37%	FCER1G/PYCARD/TLR2/SASH3/CD34/LGALS9/CD83/NOD2/TLR4
GO:0033028	GO:0033028	myeloid cell apoptotic process	28	0.632504298	1.662018242	0.003642987	0.045667447	0.038877933	752	tags=32%, list=7%, signal=30%	FCER1G/IRF7/CCL5/ITPKB/CCR5/MEF2C/PTEN/CLEC5A/NOD2
GO:0033032	GO:0033032	regulation of myeloid cell apoptotic process	25	0.675085726	1.744902572	0.003642987	0.045667447	0.038877933	1059	tags=40%, list=10%, signal=36%	FCER1G/IRF7/CCL5/ITPKB/CCR5/MEF2C/PTEN/CLEC5A/NOD2/ANXA1
GO:0034122	GO:0034122	negative regulation of toll-like receptor signaling pathway	25	0.674982324	1.744635307	0.003642987	0.045667447	0.038877933	1553	tags=36%, list=14%, signal=31%	CD14/LYN/LY96/CD300A/LILRA2/TLR4/ARRB2/TLR3/TICAM1
GO:0043370	GO:0043370	regulation of CD4-positive, alpha-beta T cell differentiation	31	0.661802237	1.777610806	0.003642987	0.045667447	0.038877933	1128	tags=39%, list=10%, signal=35%	HLX/GATA3/NCKAP1L/CD86/SASH3/CCL19/LGALS9/CD83/BCL6/SMAD7/ANXA1/IL18
GO:0045070	GO:0045070	positive regulation of viral genome replication	28	0.632230819	1.661299627	0.003642987	0.045667447	0.038877933	921	tags=25%, list=8%, signal=23%	IFIT1/CCL5/ADAR/CNOT7/STOM/PKN2/TOP2A
GO:0050716	GO:0050716	positive regulation of interleukin-1 secretion	22	0.695404549	1.755790553	0.003642987	0.045667447	0.038877933	1643	tags=45%, list=15%, signal=39%	PYCARD/CASP1/CCL19/LGALS9/CARD8/NOD2/AIM2/TLR4/HK1/NLRP1
GO:0050869	GO:0050869	negative regulation of B cell activation	28	0.706294175	1.855914348	0.003642987	0.045667447	0.038877933	905	tags=36%, list=8%, signal=33%	LYN/CD300A/SAMSN1/MNDA/BTK/TNFRSF21/SFRP1/INPP5D/CASP3/BCL6
GO:0070266	GO:0070266	necroptotic process	28	0.726368504	1.908663242	0.003642987	0.045667447	0.038877933	1553	tags=54%, list=14%, signal=46%	CD14/LY96/PYGL/CFLAR/BIRC3/FAS/CAV1/CASP8/TLR4/FADD/RBCK1/CYLD/TLR3/DNM1L/TICAM1
GO:0071402	GO:0071402	cellular response to lipoprotein particle stimulus	25	0.670955881	1.734228108	0.003642987	0.045667447	0.038877933	1049	tags=44%, list=10%, signal=40%	ITGB2/FCER1G/CD36/PPARG/MYD88/SYK/ABCA1/CDH13/ABCG1/TLR4/NPC1
GO:0071624	GO:0071624	positive regulation of granulocyte chemotaxis	28	0.621361694	1.632739055	0.003642987	0.045667447	0.038877933	933	tags=32%, list=8%, signal=29%	C3AR1/RAC2/NCKAP1L/C5AR1/CCL19/CD74/PF4/CCL21/C1QBP
GO:0002507	GO:0002507	tolerance induction	21	0.724051875	1.800965516	0.003683241	0.045864929	0.039046054	1195	tags=29%, list=11%, signal=26%	LYN/IDO1/LILRB2/LGALS9/HLA-G/TGFBR2
GO:0039528	GO:0039528	cytoplasmic pattern recognition receptor signaling pathway in response to virus	21	0.714276118	1.776649852	0.003683241	0.045864929	0.039046054	933	tags=38%, list=8%, signal=35%	IFIH1/IRF7/DDX58/DDX60/DHX58/RNF125/BIRC3/C1QBP
GO:0050718	GO:0050718	positive regulation of interleukin-1 beta secretion	21	0.702102912	1.74637091	0.003683241	0.045864929	0.039046054	1643	tags=48%, list=15%, signal=41%	PYCARD/CASP1/CCL19/LGALS9/CARD8/NOD2/AIM2/TLR4/HK1/NLRP1
GO:0030335	GO:0030335	positive regulation of cell migration	367	0.362327009	1.407616904	0.003841229	0.047621067	0.040541101	1901	tags=25%, list=17%, signal=21%	C3AR1/PTPRC/LYN/PYCARD/CCR1/POSTN/CCL4/CSF1R/CORO1A/PLA2G7/FN1/PDGFD/RAC2/CCL5/GATA3/FGR/NCKAP1L/HMOX1/MCAM/PDGFRA/C5AR1/PLK2/CCL8/NRP1/SNAI2/S1PR1/SOD2/CXCL12/KDR/CXCL10/CCL19/HDAC9/ANGPT1/CDH13/LGALS9/SPHK1/PRKD2/VEGFC/SEMA4C/SDCBP/CCR2/CD74/DOCK4/CD40/SWAP70/PF4/ADAM10/PDCD10/CCL21/PLAU/C1QBP/THY1/APP/LAMB1/FADD/ANXA1/SEMA3F/PTGS2/FLT4/TGFBR2/TNFAIP6/PGF/ITGA4/CCL20/TNFSF14/SPARC/FPR2/PPM1F/IL…
GO:0060627	GO:0060627	regulation of vesicle-mediated transport	367	0.37771154	1.467384806	0.003841229	0.047621067	0.040541101	947	tags=14%, list=9%, signal=13%	ITGB2/HCK/FCER1G/CD36/CD14/LYN/PYCARD/DOCK2/TLR2/CD300A/CORO1A/PTX3/PPARG/RAC2/ITGAM/FGR/APOC1/NCKAP1L/MERTK/RAPGEF4/HMOX1/IL13RA2/SYK/NRP1/SYT11/RAP1A/TBC1D8/CCL19/ARAP3/RALA/C3/ANGPT1/CDH13/MFGE8/LGALS9/PTEN/CSK/SDCBP/CCR2/CCL2/MICAL1/MAP2K1/STX18/C2/MSN/ATG3/FES/CCL21/CADPS2/VPS4B/CAV1/C12orf4
GO:0006520	GO:0006520	cellular amino acid metabolic process	291	-0.433578682	-1.829708126	0.00390625	0.048320485	0.041136535	1785	tags=32%, list=16%, signal=27%	MTHFD2L/OTC/ARG1/LRRC47/FARSA/NARS2/SLC6A8/CTH/PCYOX1/FOLH1B/ALDH18A1/BPHL/CBS/HAAO/EEF1E1/GCAT/AMT/PARK7/HMGCL/CKMT2/IVD/DARS/DARS2/ADSS/PSMC3/DAO/PLOD3/PLOD1/ACAT1/ASRGL1/SCLY/SARS/ALDH4A1/ODC1/PEPD/QDPR/MSRA/PRODH/MCCC1/AUH/SLC7A7/ABAT/GCDH/IARS/DDC/SARS2/FPGS/AHCY/ENOPH1/ADI1/CARS2/PIPOX/MTHFS/GOT1/PHGDH/FTCD/UPB1/NR1H4/THNSL2/DDAH1/CKB/NQO1/PSAT1/BCKDHA/GGT1/ASS1/PAH/SLC7A8/CRYM/MPST/SLC3A1/…
GO:0006790	GO:0006790	sulfur compound metabolic process	278	-0.366343078	-1.542460005	0.003921569	0.048403361	0.04120709	2283	tags=40%, list=21%, signal=32%	GSTA4/B3GNT3/NUBP2/CHST12/GNMT/KERA/GSTZ1/B4GALT3/MICAL2/CHPF/MMS19/SULT1B1/GALNS/SULT1C2/SCD5/MTRR/B4GALT4/CPS1/GGTLC1/PAX8/CHST4/MVK/MLYCD/PEMT/ACSBG2/NFS1/NUBPL/MCCC2/B4GALT2/G6PD/MVD/HAGH/GSTP1/CHAC1/AGXT/AASS/DGAT1/MAT2A/ST3GAL6/MTHFD2L/CHST5/HMGCS1/DLAT/CTH/PCYOX1/GSTM3/SUOX/GLCE/CBS/SUCLG1/EEF1E1/IMPAD1/ACOT8/HSPA9/NARFL/PARK7/HMGCL/B3GNT4/SPOCK2/GLO1/SNCA/ST3GAL1/ISCA1/SUCLG2/ACAT1/HSD17B…
GO:0006631	GO:0006631	fatty acid metabolic process	281	-0.414229117	-1.738062347	0.003968254	0.048765239	0.041515166	1931	tags=31%, list=18%, signal=26%	GSTP1/ALOX12B/SCAP/AKT1/LPGAT1/PRKAG2/ECHDC2/ALOXE3/HADH/UGT1A8/DLAT/FABP3/MAPK3/PLA2G15/IRS2/NDUFS6/ERLIN2/GNPAT/ACAA2/ACOT8/CYP2B6/PTGES2/CYP1B1/IVD/AMACR/ADIPOR1/SLC25A17/SNCA/ACADVL/ACADL/CPT2/ACAT1/ACOX2/HSD17B8/SIRT1/TYRP1/ACSF2/ACOT11/GPX4/PEX7/CYP4F2/CYP2C9/PPARGC1A/ACAA1/CBR4/NR1H2/AUH/ACACA/GCDH/ACSM3/DECR2/NR4A3/CES2/APOC3/ETFB/ECHS1/CRYL1/ANGPTL3/ACOT7/FAAH/HAO2/AACS/THNSL2/MCAT/ACACB…
GO:0048193	GO:0048193	Golgi vesicle transport	277	-0.360655804	-1.515239936	0.003968254	0.048765239	0.041515166	2604	tags=35%, list=24%, signal=28%	KLC2/LMAN2L/TMED1/COPZ2/KIF3C/VPS13A/GOLPH3L/CTAGE1/RAB6B/F5/EXOC2/AP1G1/TMED2/RANGRF/TRAPPC9/KIF5A/CUX1/LMAN2/ACTR10/RAB26/DYNC1LI1/LMAN1/DCTN2/DYNC1H1/SEC31B/SEC23B/ARFGAP3/YIF1A/TMED5/COPA/SGSM2/BBS1/ANK3/VPS13C/USO1/GCC2/GOLGA3/TRAPPC2L/ATP9B/MACF1/CREB3L2/AP4M1/TRAPPC10/ARCN1/CNIH3/STX5/PDCD6/COG4/RNF139/COG2/CD55/DCTN1/F9/KLHL12/PROZ/ARL3/PREB/TMEM115/NAPA/DOPEY1/LLGL1/LMF1/DCTN4/FOLR1/TRAP…
GO:0030198	GO:0030198	extracellular matrix organization	278	0.380569143	1.442205458	0.004016064	0.049137727	0.041832276	983	tags=16%, list=9%, signal=15%	ITGB2/COL1A2/COL6A3/LCP1/CTSS/TGFBI/POSTN/FN1/COL3A1/ADAMTS5/CD44/COL4A1/COL4A2/ITGAM/A2M/ICAM2/PECAM1/ITGA8/COL5A2/JAM2/CTSK/KDR/VCAN/LUM/FAP/CSGALNACT1/NID2/TIMP1/SERPINH1/FBN1/FSCN1/CFLAR/VWF/LAMA2/MPV17/ADAM10/VCAM1/ENG/LAMC1/THBS2/MMP2/APP/LAMB1/ITGAL
GO:0044282	GO:0044282	small molecule catabolic process	331	-0.400220627	-1.715229323	0.004016064	0.049137727	0.041832276	1600	tags=28%, list=15%, signal=25%	NT5M/PCYOX1/PLA2G15/IRS2/ENPP4/CBS/ACAA2/HAAO/GCAT/ACOT8/PFKM/AMT/PFKFB2/HMGCL/IVD/AMACR/ENTPD6/SLC25A17/APOBEC3C/ALDH2/DAO/FUT6/ACADVL/ACADL/CPT2/ACAT1/ASRGL1/ACOX2/AKR1A1/ALDH4A1/PFKL/BDH1/PEX7/QDPR/CYP4F2/ALDOA/QPRT/PRODH/ACAA1/MCCC1/AUH/SULT1A2/ABAT/GCDH/DECR2/ALDH3B1/ETFB/ECHS1/AHCY/CRYL1/GPI/PIPOX/DCXR/FAAH/GK/MTHFS/GOT1/FTCD/HAO2/UPB1/ALDOC/THNSL2/PGM1/MCAT/DDAH1/ACACB/BAD/BCKDHA/PAH/CRYM/…
GO:0006732	GO:0006732	coenzyme metabolic process	297	-0.356412139	-1.503540806	0.004081633	0.049831411	0.042422827	1457	tags=24%, list=13%, signal=21%	SUCLG1/ACOT8/PFKM/PFKFB2/DCAKD/HMGCL/MTHFD2/MYOG/SNCA/COQ10B/SEH1L/CYB5R3/SUCLG2/ACAT1/DDIT4/LDHB/HSD17B8/AKR1A1/ACSF2/ACOT11/FOLR1/THTPA/COQ7/COASY/PFKL/QDPR/CYP4F2/ALDOA/QPRT/PPARGC1A/CBR4/MCCC1/ACACA/SLC25A1/GCDH/ACSM3/PMVK/FPGS/FMO1/AHCY/GPD1/CYB5A/GPI/ACOT7/PIPOX/DCXR/MTHFS/FTCD/ALDOC/PANK4/PGM1/ACACB/COQ4/VNN1/GPD1L/PDK2/FBP1/IGF1/BHMT2/MTHFD1/GLYAT/ALDOB/BST1/HMGCS2/PC/DHTKD1/OGDHL/SHMT1/A…
GO:0046394	GO:0046394	carboxylic acid biosynthetic process	332	-0.367668996	-1.573526527	0.004098361	0.049927101	0.042504291	1541	tags=25%, list=14%, signal=22%	AAAS/FOLH1B/ALDH18A1/CBS/ERLIN2/HAAO/ACOT8/PFKM/PFKFB2/PARK7/PTGES2/MYOG/AMACR/ADIPOR1/ACADVL/SEH1L/ACADL/PLOD3/PLOD1/ACOX2/DDIT4/HSD17B8/SIRT1/AKR1A1/PFKL/ALDOA/OSBP/PPARGC1A/CBR4/NR1H2/ACACA/ABAT/ACSM3/DECR2/APOC3/FPGS/AHCY/ENOPH1/GPD1/ADI1/GPI/ACOT7/UGP2/MTHFS/GOT1/DCN/PHGDH/UPB1/ALDOC/NR1H4/THNSL2/PGM1/MCAT/ACACB/PRKAB1/PSAT1/EGF/GGT1/ASS1/PAH/FBP1/IGF1/BHMT2/MIF/MTHFD1/OLAH/ASL/GLS/GATM/ALDO…
